# Supplementary material for: The Elongator Subunit Elp3 Regulates Development, Stress Tolerance, Cell Cycle, and Virulence in the Entomopathogenic Fungus Beauveria bassiana
Source: MDPI journal article supplement (doi:10.3390/jof8080834), 2022-08-10
Supplement: s1 [file s1]

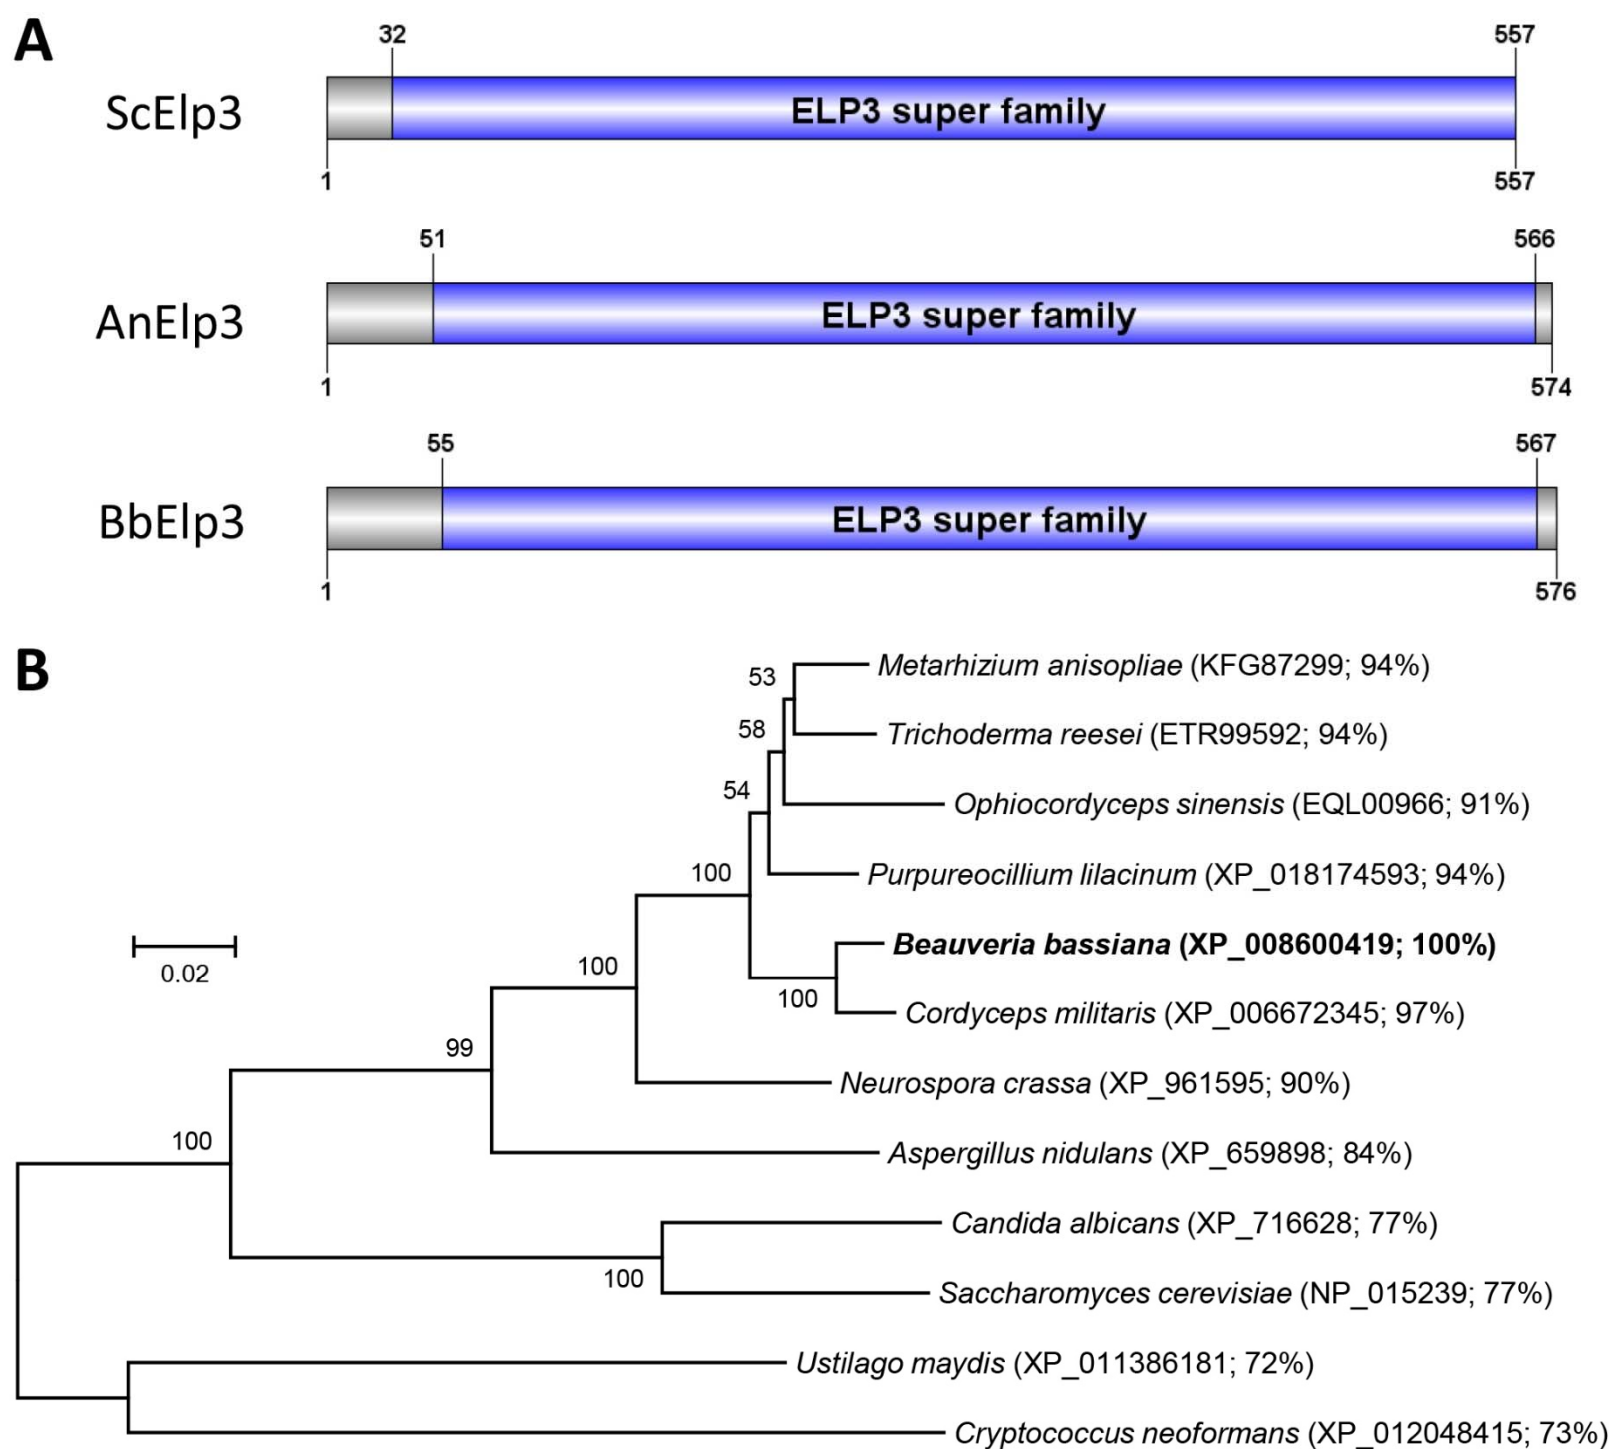

**Figure S1.** Bioinformatic analysis of fungal Elp3 homologues. **(A)** Sequence features of Elp3 homologs found in *Beauveria bassiana* (Bb), *Saccharomyces cerevisiae* (Sc), and *Aspergillus nidulans* (An). The domain of each protein was predicted at <https://blast.ncbi.nlm.nih.gov/Blast.cgi>. **(B)** Phylogenetic relationship of *B. bassiana* Elp3 with the homologs found in other representative fungi. A neighbor-joining method in MEGA7 at <http://www.megasoftware.net> was used in the phylogenetic analysis. Each fungal name is followed by the NCBI accession code of each protein and its sequence identity (%) to *B. bassiana* Elp3 in parentheses. Poisson model was used with 1000 bootstrap replications in uniform rates. Scale bar: branch length proportional to genetic distance assessed with the neighbor-joining method.

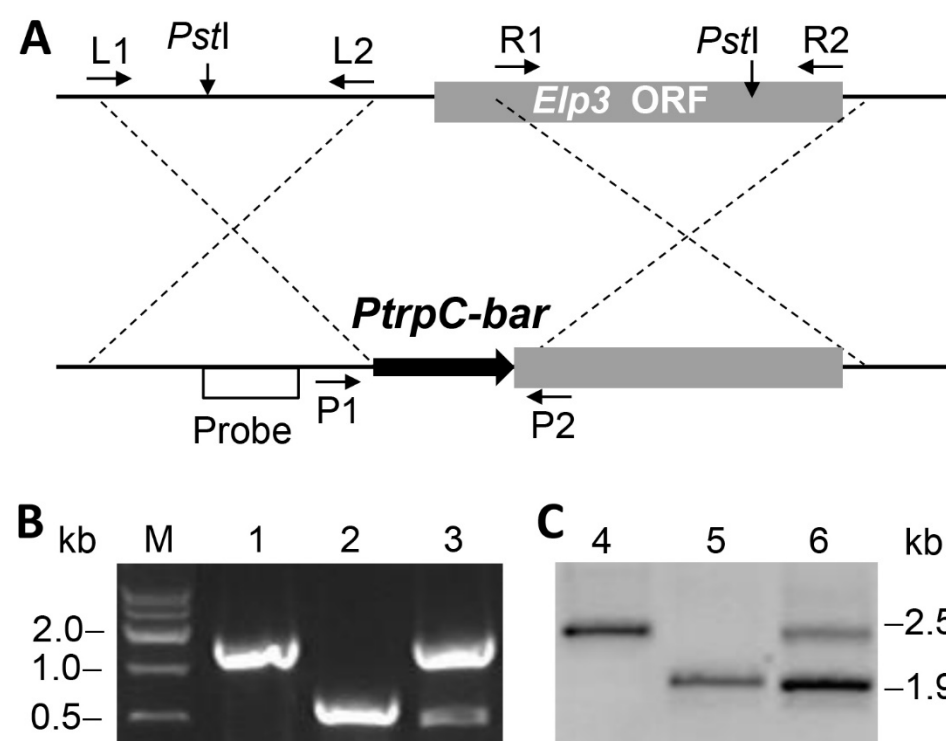

**Figure S2** Construction and identification of *B. bassiana* *Elp3* mutants. **(A)** Schematic diagram for the strategy of *Elp3* deletion. **(B)** The *Elp3* mutants identified via PCR (lanes 1–3) and Southern blotting (lanes 4–6) analyses with paired primers and amplified probe (Table S1). Lanes 1 and 4:  $\Delta Elp3$  mutant. Lanes 2 and 5: wild-type. Lanes 3 and 6:  $\Delta Elp3::Elp3$  mutant. Genomic DNAs were digested with *Pst*I at the marked sites for the Southern blotting hybridization of *Elp3*.

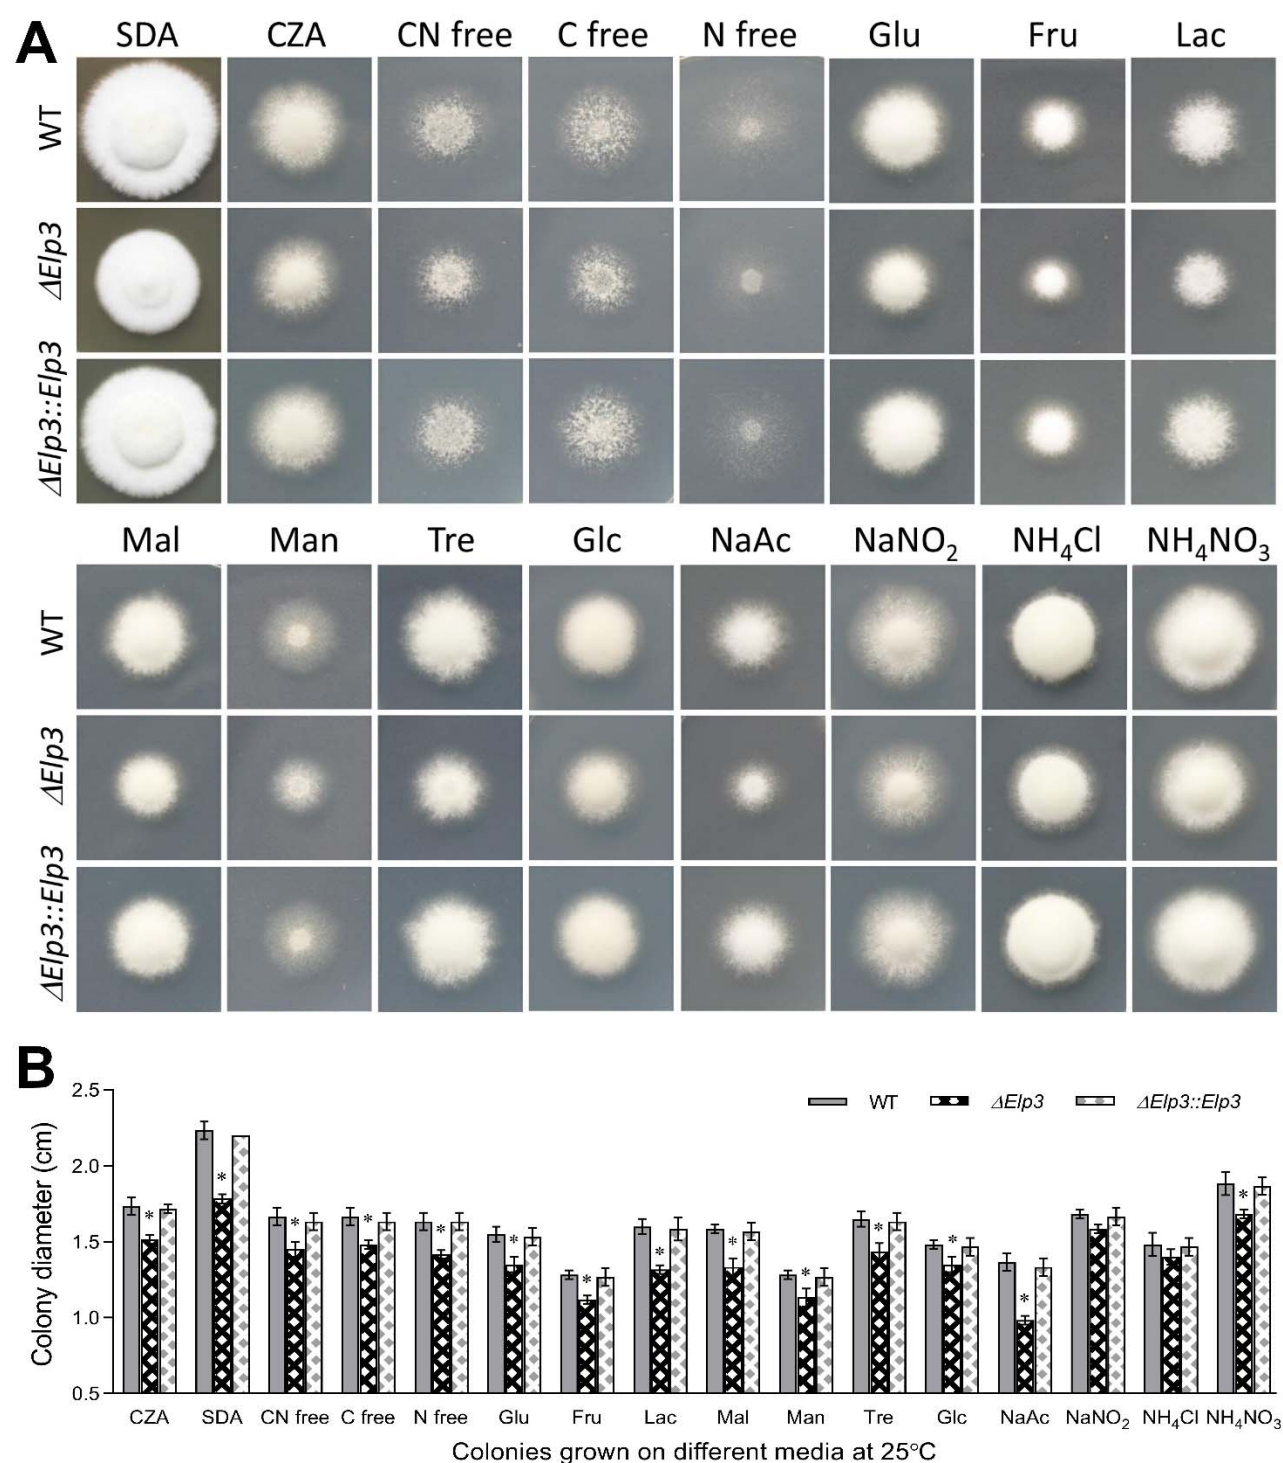

**Figure S3** Impact of *BbElp3* deletion on carbon/nitrogen metabolism. **(A,B)** Representative images and colony diameters after 8 d inoculation at 25°C on tested media. Carbon sources tested: Glu; glucose, Fru; fructose, Lac; lactose, Mal; maltose, Man; mannitol, Tre; trehalose, Glc; glycerol, NaAc. Nitrogen sources tested: NaNO<sub>2</sub>, NH<sub>4</sub>Cl or NH<sub>4</sub>NO<sub>3</sub>. Additional media: carbon-deleted (C free), nitrogen-deleted (N free) or both deleted (CN free). All colonies were initiated by spotting 1  $\mu$ l of  $1 \times 10^6$  conidia/ml suspension on the plates. All experiments were performed three times. Error bars =  $\pm$  SD. Asterisks indicate significantly different from unmarked (Tukey's HSD, \* indicates  $p < 0.05$ ).

**Table S1.** Primers used for genetic manipulation of *Elp3* in *B. bassiana*.

| Primers    | Paired sequences (5'-3')*                                                                                    | Purpose                                   |
|------------|--------------------------------------------------------------------------------------------------------------|-------------------------------------------|
| cElp3-F/R  | CCCGGGACTAGTGATATCATGGCTACCGCTACAGTCA / CTTGCTCACCATGAATTCTTCTTCAGCCGGCCCT                                   | Cloning <i>Elp3</i> cDNA(1728 bp)         |
| Elp3up-F/R | AAAAAACCCTGGGCTGCTCTCTCCAGCCTCATTC / AAAAAAAGCTTTCTTCTGCAATGACCGTCTGT                                        | Cloning <i>Elp3</i> 5'-end (1618 bp)      |
| Elp3dn-F/R | AAAAAAGATCTGCGACATCAACCTCAACAGC / AAAAACTAGTGCCAACCCCGATTCTATTTT                                             | Cloning <i>Elp3</i> 3'-end (1676 bp)      |
| Elp3fl-F/R | <u>ggggACCACTTTGTACAAGAAAGCTTGCGTCCGGTATGTGGTGA /</u><br><u>ggggACAAGTTTGTACAAAAAAGCAACCGAGCCGTGGTAAATGG</u> | Cloning full-length <i>Elp3</i> (4416 bp) |
| pElp3-F/R  | CTGCCCCACCTTGACACATC / TGTAGTGTTGCGGGGATAGCG                                                                 | PCR detecting <i>Elp3</i>                 |
| sbElp3-F/R | <u>CTTGCTTGATGTGACCTCGTA/</u> GCTGGTAATTGCCCGTAT                                                             | Southern blotting <i>Elp3</i> (420 bp)    |

\* Underlined regions denote the restriction enzyme sites used for cloning *Elp3* cDNA (*SpeI/EcoRI*) or deleting *Elp3* (*XmaI/HindIII* and *BglII/SpeI*) and the fragments of gateway exchange for *Elp3* complementation.
