# Supplementary material for: The Elongator Subunit Elp3 Regulates Development, Stress Tolerance, Cell Cycle, and Virulence in the Entomopathogenic Fungus Beauveria bassiana
Source: J Fungi (Basel). 2022 Aug 10;8(8):834. doi: 10.3390/jof8080834 (PMC9410351; doi:10.3390/jof8080834)
Supplement: Supplementary file 1 [file jof-08-00834-s001.zip › jof-1854723-supplementary-Tables S2-S10.xlsx]

## Sheet: Table S2
Table S2. Lists of 775 differentially expressed genes in ΔBbElp3 versus WT.
Gene ID	Gene loci	Protein description	Log2(ΔElp3/WT)	Fold Change	P value	Q value	Regulation
BBA_03053	EJP68157	abc transporter	-5.09054	0.029349	0.00550896	0.0507664	Down
BBA_02988	EJP68092	ATPase protein	-4.49983	0.0441995	0.000730967	0.0120007	Down
BBA_05184	EJP65773	Trypsin-related protease	-4.47082	0.0450971	0.00171577	0.0224072	Down
BBA_06710	EJP64328	UV-endonuclease UvdE	-4.3025	0.0506778	0.00107242	0.0157202	Down
BBA_03634	EJP67060	hypothetical protein BBA_03634	-4.24052	0.0529025	9.22056e-05	0.0023361	Down
BBA_00733	EJP69864	SAM-dependent methyltransferase	-3.8693	0.0684263	0.00870135	0.0693738	Down
BBA_00628	EJP70998	salicylate hydroxylase	-3.63364	0.0805686	6.61075e-12	1.05989e-09	Down
BBA_03659	EJP67085	hypothetical protein BBA_03659	-3.57849	0.0837081	0.00872693	0.0693738	Down
BBA_08897	EJP62100	longiborneol synthase	-3.41331	0.0938624	7.32463e-10	8.16935e-08	Down
BBA_05224	EJP65813	protein phosphatase 2C	-3.35927	0.0974447	0.00110858	0.0161579	Down
BBA_03899	EJP67325	CHY zinc finger domain-containing protein	-3.35748	0.0975661	0.000141866	0.00330087	Down
BBA_09690	EJP61345	hypothetical protein BBA_09690	-3.34822	0.0981944	0.0440037	0.200676	Down
BBA_02326	EJP68324	sodium symporter family protein	-3.26731	0.103858	2.03069e-06	0.000102645	Down
BBA_05652	EJP65321	hypothetical protein BBA_05652	-3.24477	0.105494	0.00490412	0.0465936	Down
BBA_04912	EJP65941	hypothetical protein BBA_04912	-3.21954	0.107355	0.0206585	0.123028	Down
BBA_04963	EJP65992	hypothetical protein BBA_04963	-3.20147	0.108708	2.17262e-13	4.54965e-11	Down
BBA_00441	EJP70811	hypothetical protein BBA_00441	-3.15505	0.112262	0.00166327	0.0218806	Down
BBA_03471	EJP67691	FAD dependent oxidoreductase domain containing protein	-3.10641	0.116112	0.0245842	0.138451	Down
BBA_05973	EJP65203	hypothetical protein BBA_05973	-3.08063	0.118206	0.0194601	0.118915	Down
BBA_06603	EJP64609	hypothetical protein BBA_06603	-3.06703	0.119326	0.0108701	0.0800705	Down
BBA_04552	EJP66612	LysM domain protein	-3.03246	0.122219	0.0150922	0.100821	Down
BBA_08501	EJP62590	putative SAM-dependent methyltransferase	-3.01452	0.123748	0.000653538	0.0109574	Down
BBA_04932	EJP65961	hypothetical protein BBA_04932	-2.94946	0.129457	0.00893424	0.0704103	Down
BBA_10258	EJP60790	pol-like protein	-2.9374	0.130543	0.00409696	0.0411743	Down
BBA_01131	EJP70262	hypothetical protein BBA_01131	-2.92938	0.131271	0.00287532	0.0323151	Down
BBA_08390	EJP62675	hypothetical protein BBA_08390	-2.91343	0.132731	4.16988e-08	3.07821e-06	Down
BBA_04794	EJP66301	hypothetical protein BBA_04794	-2.8983	0.13413	0.00291285	0.0325572	Down
BBA_06568	EJP64574	hypothetical protein BBA_06568	-2.8734	0.136464	0.00632264	0.0561216	Down
BBA_06565	EJP64571	hypothetical protein BBA_06565	-2.86252	0.137498	0.0163618	0.106057	Down
BBA_03458	EJP67678	TfdA family Taurine catabolism dioxygenase TauD	-2.83996	0.139665	4.46304e-09	4.01713e-07	Down
BBA_06566	EJP64572	ankyrin repeat protein	-2.82336	0.141281	0.0338406	0.169799	Down
BBA_03425	EJP67645	hypothetical protein BBA_03425	-2.81065	0.142532	0.00404989	0.0408584	Down
BBA_04835	EJP66342	hypothetical protein BBA_04835	-2.79923	0.143664	0.00618644	0.0551992	Down
BBA_04635	EJP66695	CAMK kinase	-2.78562	0.145025	0.00820919	0.066431	Down
BBA_07407	EJP63763	hypothetical protein BBA_07407	-2.7809	0.145501	0.0226503	0.131456	Down
BBA_08626	EJP62405	hypothetical protein BBA_08626	-2.74009	0.149675	2.27857e-05	0.000761576	Down
BBA_00968	EJP70099	hypothetical protein BBA_00968	-2.73839	0.149852	0.000113838	0.00275493	Down
BBA_08500	EJP62589	hypothetical protein BBA_08500	-2.73787	0.149906	1.90648e-06	9.86981e-05	Down
BBA_06588	EJP64594	hypothetical protein BBA_06588	-2.71857	0.151925	0.0300375	0.157655	Down
BBA_08411	EJP62696	RNA polymerase M/15 kDa subunit	-2.65977	0.158245	0.00740475	0.0624837	Down
BBA_04933	EJP65962	hypothetical protein BBA_04933	-2.64232	0.160171	0.00855718	0.0687052	Down
BBA_08580	EJP62496	subtilisin-like serine protease	-2.63265	0.161248	0.017775	0.11169	Down
BBA_06699	EJP64317	hypothetical protein BBA_06699	-2.59877	0.165079	0.00152708	0.0204028	Down
BBA_05163	EJP65752	GATA transcription factor AreB	-2.57244	0.168119	0.00697298	0.0600891	Down
BBA_03426	EJP67646	BCS1 protein precursor	-2.55352	0.170339	0.000294743	0.006073	Down
BBA_07328	EJP63684	hypothetical protein BBA_07328	-2.54866	0.170913	0.00483461	0.0460185	Down
BBA_00589	EJP70959	pyruvate dehydrogenase	-2.52051	0.174281	0.00227703	0.0272951	Down
BBA_08114	EJP62909	eukaryotic translation initiation factor 6	-2.51358	0.17512	0.0039245	0.0401089	Down
BBA_08581	EJP62497	hypothetical protein BBA_08581	-2.50789	0.175812	0.00789484	0.064859	Down
BBA_10301	EJP60750	UbiA prenyltransferase	-2.49717	0.177124	0.00911116	0.0713661	Down
BBA_03048	EJP68152	SNO glutamine amidotransferase	-2.48711	0.178364	0.0234845	0.134623	Down
BBA_09176	EJP61839	alkaline serine protease AorO	-2.48589	0.178515	3.45507e-05	0.00106163	Down
BBA_07782	EJP63182	hypothetical protein BBA_07782	-2.4826	0.178921	0.0124259	0.0875649	Down
BBA_09236	EJP61816	hypothetical protein BBA_09236	-2.47609	0.179731	4.32798e-06	0.000194778	Down
BBA_09555	EJP61476	hypothetical protein BBA_09555	-2.46056	0.181676	2.15625e-06	0.000106885	Down
BBA_09569	EJP61490	hypothetical protein BBA_09569	-2.45033	0.182969	1.65697e-05	0.00058628	Down
BBA_03457	EJP67677	phthalate transporter	-2.37816	0.192355	1.97513e-16	5.79052e-14	Down
BBA_04723	EJP66230	hypothetical protein BBA_04723	-2.37516	0.192755	0.0158423	0.10427	Down
BBA_03110	EJP68214	OPT oligopeptide transporter	-2.37066	0.193358	0.00955564	0.0735011	Down
BBA_03290	EJP67510	hypothetical protein BBA_03290	-2.32822	0.19913	0.0269869	0.147687	Down
BBA_06602	EJP64608	abc transporter	-2.292	0.204193	1.90812e-05	0.000663703	Down
BBA_02186	EJP69151	protein kinase domain-containing protein	-2.26403	0.20819	0.0140885	0.0959857	Down
BBA_01925	EJP68890	putative C2H2 zinc finger protein	-2.25736	0.209154	6.7831e-06	0.000291219	Down
BBA_04305	EJP67012	NF-X1 type zinc finger protein	-2.24901	0.210369	6.76291e-12	1.0676e-09	Down
BBA_07294	EJP63650	protease S8 tripeptidyl peptidase I (cln2)	-2.23904	0.211827	0.00357388	0.0374492	Down
BBA_08502	EJP62591	hypothetical protein BBA_08502	-2.22511	0.213883	1.3203e-24	7.52645e-22	Down
BBA_01117	EJP70248	C6 zinc finger domain-containing protein	-2.22217	0.214319	0.0317399	0.16282	Down
BBA_00056	EJP70426	hypothetical protein BBA_00056	-2.22098	0.214495	0.0111643	0.0812003	Down
BBA_02944	EJP68048	tat pathway signal sequence	-2.21947	0.21472	0.014856	0.0995671	Down
BBA_06601	EJP64607	hypothetical protein BBA_06601	-2.18633	0.219709	0.000597919	0.0102693	Down
BBA_10326	EJP60727	hypothetical protein BBA_10326	-2.17497	0.221447	1.57582e-12	2.93991e-10	Down
BBA_09565	EJP61486	hypothetical protein BBA_09565	-2.16251	0.223368	6.076e-13	1.17634e-10	Down
BBA_03795	EJP67221	hypothetical protein BBA_03795	-2.15869	0.22396	0.0415789	0.192876	Down
BBA_05165	EJP65754	RBP protein	-2.15245	0.224931	0.00650547	0.0570536	Down
BBA_07053	EJP64048	sugar porter family MFS transporter	-2.1476	0.225688	0.0283361	0.15255	Down
BBA_04721	EJP66228	serine protein kinase	-2.1392	0.227006	0.00262556	0.0305799	Down
BBA_03856	EJP67282	GATA zinc finger protein	-2.13492	0.22768	4.85975e-05	0.00140073	Down
BBA_06743	EJP64361	hypothetical protein BBA_06743	-2.1275	0.228854	3.485e-14	8.12718e-12	Down
BBA_09480	EJP61570	hypothetical protein BBA_09480	-2.11361	0.231068	0.0421807	0.194524	Down
BBA_09138	EJP61886	hypothetical protein BBA_09138	-2.08898	0.235046	0.000366305	0.00710521	Down
BBA_03046	EJP68150	hypothetical protein BBA_03046	-2.07293	0.237677	0.00390147	0.0399846	Down
BBA_01079	EJP70210	hypothetical protein BBA_01079	-2.0698	0.238193	0.000607702	0.0103754	Down
BBA_04031	EJP66738	hypothetical protein BBA_04031	-2.05709	0.2403	0.00214124	0.0262299	Down
BBA_06604	EJP64610	casein kinase 1 epsilon	-2.04548	0.242241	0.00428776	0.0425952	Down
BBA_08642	EJP62421	ATPase protein	-2.04286	0.242682	0.0102919	0.0774802	Down
BBA_03472	EJP67692	Ankyrin repeat protein	-2.032	0.244515	5.07858e-06	0.000222698	Down
BBA_09802	EJP61266	tRNA (uracil-5-)-methyltransferase	-2.01507	0.247402	0.00269821	0.0311082	Down
BBA_04743	EJP66250	fusicoccadiene synthase	-2.0123	0.247877	0.000293705	0.006073	Down
BBA_09498	EJP61530	FkbM family methyltransferase	-2.00443	0.249234	0.00435127	0.0428899	Down
BBA_09488	EJP61578	hypothetical protein BBA_09488	-1.99474	0.250913	0.0120354	0.0854636	Down
BBA_06333	EJP64764	phospholipase A2	-1.99102	0.251562	0.00433174	0.0427796	Down
BBA_04174	EJP66881	hypothetical protein BBA_04174	-1.97708	0.254003	3.32371e-12	5.8801e-10	Down
BBA_05472	EJP65603	hypothetical protein BBA_05472	-1.97372	0.254595	0.000621342	0.0105208	Down
BBA_03477	EJP67697	Cytochrome P450 CYP682H1	-1.97266	0.254783	0.0239028	0.135882	Down
BBA_02667	EJP68665	cyclin-like protein	-1.94959	0.258889	0.000146867	0.00338653	Down
BBA_02056	EJP69021	YT521-B-like splicing factor	-1.93002	0.262425	0.000923025	0.014073	Down
BBA_04415	EJP66475	hypothetical protein BBA_04415	-1.92842	0.262717	0.0201774	0.121218	Down
BBA_02616	EJP68614	receptor-interacting serine/threonine-protein kinase	-1.92403	0.263517	0.0169297	0.108292	Down
BBA_02577	EJP68575	hypothetical protein BBA_02577	-1.92389	0.263543	0.0174085	0.110061	Down
BBA_03047	EJP68151	pyridoxine biosynthesis protein	-1.90999	0.266094	0.00573044	0.0520816	Down
BBA_06302	EJP64733	hypothetical protein BBA_06302	-1.90849	0.266371	0.0418849	0.19377	Down
BBA_00518	EJP70888	hypothetical protein BBA_00518	-1.89715	0.268473	1.3615e-05	0.00050073	Down
BBA_05793	EJP65462	hypothetical protein BBA_05793	-1.89416	0.269031	0.0322606	0.163874	Down
BBA_04559	EJP66619	hypothetical protein BBA_04559	-1.89245	0.269348	6.89167e-05	0.00187574	Down
BBA_01170	EJP70301	ribosome biogenesis regulatory protein	-1.89242	0.269355	0.00159454	0.0211117	Down
BBA_06574	EJP64580	hypothetical protein BBA_06574	-1.89003	0.269802	2.29246e-09	2.15807e-07	Down
BBA_01441	EJP69476	zinc finger protein SFP1	-1.88715	0.27034	0.000614184	0.0104513	Down
BBA_05879	EJP65109	aorsin-like protein	-1.88291	0.271135	0.0163541	0.106057	Down
BBA_04328	EJP67035	aminotriazole resistance protein	-1.88007	0.27167	2.10415e-08	1.71354e-06	Down
BBA_03123	EJP68227	uracil permease	-1.87096	0.273392	0.00688618	0.0596355	Down
BBA_05835	EJP65065	putative peptide transporter	-1.86644	0.27425	0.000135809	0.00321832	Down
BBA_03965	EJP67391	aorsin-like protein	-1.85545	0.276346	0.000379043	0.00728106	Down
BBA_06421	EJP64427	carboxypeptidase S1	-1.83762	0.279783	6.67529e-05	0.00182654	Down
BBA_06573	EJP64579	poly polymerase 2 ADP-ribosyltransferase 2	-1.82826	0.281605	9.0972e-10	9.93046e-08	Down
BBA_07291	EJP63647	peptidase A4 family protein	-1.816	0.284007	0.0035045	0.0368439	Down
BBA_08359	EJP62644	shwachman-Bodian-Diamond syndrome protein	-1.79915	0.287344	0.00476819	0.0456403	Down
BBA_01678	EJP69713	ZIP Zinc transporter family protein	-1.79356	0.288459	1.10112e-09	1.16481e-07	Down
BBA_05497	EJP65628	protein phosphatase inhibitor	-1.78218	0.290744	0.00139881	0.0191121	Down
BBA_00916	EJP70047	hypothetical protein BBA_00916	-1.77469	0.292258	0.0356109	0.175085	Down
BBA_03808	EJP67234	NADPH-dependent 1-acyl dihydroxyacetone phosphate reductase, putative	-1.76467	0.294293	0.0270428	0.147849	Down
BBA_08476	EJP62565	serine carboxypeptidase S28	-1.76305	0.294625	4.12948e-15	1.05932e-12	Down
BBA_02892	EJP67996	hypothetical protein BBA_02892	-1.75616	0.296034	0.0111547	0.0812003	Down
BBA_01381	EJP69416	hypothetical protein BBA_01381	-1.75116	0.297063	0.00235191	0.0279964	Down
BBA_04256	EJP66963	fungal specific transcription factor	-1.72888	0.301685	0.00102648	0.0151988	Down
BBA_05728	EJP65397	hypothetical protein BBA_05728	-1.72768	0.301937	0.0396505	0.187307	Down
BBA_06830	EJP64126	endonuclease/Exonuclease/phosphatase protein	-1.72754	0.301966	0.00719805	0.0613915	Down
BBA_03469	EJP67689	hypothetical protein BBA_03469	-1.72485	0.302531	0.0215379	0.126648	Down
BBA_04827	EJP66334	peptide synthetase	-1.72294	0.302931	1.32743e-15	3.78354e-13	Down
BBA_01527	EJP69562	hypothetical protein BBA_01527	-1.70636	0.306431	7.65288e-05	0.00202195	Down
BBA_09116	EJP61960	selenium-binding protein	-1.70441	0.306846	0.0326463	0.165506	Down
BBA_03356	EJP67576	NUDIX domain protein	-1.70389	0.306957	0.0071686	0.0611955	Down
BBA_01983	EJP68948	hypothetical protein BBA_01983	-1.70036	0.30771	2.68147e-15	7.33505e-13	Down
BBA_08180	EJP62793	MFS multidrug resistance transporter, putative	-1.68127	0.311808	2.71642e-15	7.33505e-13	Down
BBA_07886	EJP63081	hsp20-like protein	-1.67303	0.313593	0.0402259	0.188247	Down
BBA_10168	EJP60884	geranylgeranyl pyrophosphate synthetase	-1.65995	0.316451	7.54309e-06	0.000315917	Down
BBA_07783	EJP63183	CFEM domain-containing protein	-1.64545	0.319647	0.0197232	0.119822	Down
BBA_07776	EJP63176	hypothetical protein BBA_07776	-1.64538	0.319662	0.00332572	0.0356214	Down
BBA_00655	EJP71025	amidohydrolase-like protein	-1.64336	0.32011	0.0165983	0.106915	Down
BBA_07327	EJP63683	putative MEI5 protein	-1.63939	0.320993	0.000476287	0.00861937	Down
BBA_08027	EJP63016	hypothetical protein BBA_08027	-1.63781	0.321344	0.0356062	0.175085	Down
BBA_09281	EJP61790	hypothetical protein BBA_09281	-1.63319	0.322375	0.0100866	0.0764389	Down
BBA_02719	EJP68717	hypothetical protein BBA_02719	-1.63264	0.322497	0.0297942	0.15702	Down
BBA_01214	EJP70345	HMG box protein	-1.63188	0.322668	0.00891606	0.0703211	Down
BBA_03966	EJP67392	hypothetical protein BBA_03966	-1.63177	0.322693	0.0140229	0.0956708	Down
BBA_03494	EJP67714	hypothetical protein BBA_03494	-1.62645	0.323884	0.0435771	0.199174	Down
BBA_05884	EJP65114	magnesium-translocating P-type ATPase family protein	-1.62	0.325335	0.000398372	0.0075698	Down
BBA_03660	EJP67086	Glycoside hydrolase, family 29	-1.61787	0.325815	0.000709304	0.0117201	Down
BBA_01037	EJP70168	hypothetical protein BBA_01037	-1.61765	0.325865	0.00958612	0.0735151	Down
BBA_06711	EJP64329	hypothetical protein BBA_06711	-1.61407	0.326674	3.46784e-07	2.10554e-05	Down
BBA_10036	EJP61022	26S proteasome regulatory subunit-like protein	-1.61079	0.32742	0.000294278	0.006073	Down
BBA_00196	EJP70566	tat pathway signal sequence	-1.60225	0.329362	0.0029159	0.0325572	Down
BBA_01093	EJP70224	hypothetical protein BBA_01093	-1.60167	0.329496	0.0193248	0.118538	Down
BBA_00122	EJP70492	rRNA-processing protein UTP23	-1.59326	0.331421	0.0186761	0.115862	Down
BBA_01122	EJP70253	trk family potassium uptake protein	-1.5861	0.33307	0.0209813	0.124406	Down
BBA_03620	EJP67840	NADH:ubiquinone oxidoreductase, 17.2kDa subunit	-1.57925	0.334656	0.00833508	0.0673435	Down
BBA_02034	EJP68999	FAD binding domain protein	-1.56107	0.338899	0.0409833	0.19063	Down
BBA_04029	EJP66736	amino acid permease	-1.5592	0.33934	0.00431912	0.042696	Down
BBA_00878	EJP70009	proline dehydrogenase	-1.55641	0.339995	4.86154e-06	0.000214095	Down
BBA_01130	EJP70261	hypothetical protein BBA_01130	-1.53593	0.344857	0.00368728	0.0381788	Down
BBA_07772	EJP63378	reverse transcriptase	-1.53389	0.345344	7.87593e-05	0.0020611	Down
BBA_02191	EJP69156	protein histidine kinase	-1.53149	0.34592	0.016761	0.107608	Down
BBA_04585	EJP66645	elongation factor-2 kinase EFK-1B isoform	-1.53	0.346278	0.000963719	0.0144996	Down
BBA_09663	EJP61367	ATP synthase F1	-1.52477	0.347535	0.000655058	0.010965	Down
BBA_05085	EJP66114	hypothetical protein BBA_05085	-1.52351	0.347838	1.62093e-05	0.000575515	Down
BBA_00462	EJP70832	APSES transcription factor Xbp1	-1.52283	0.348004	1.04731e-05	0.000408618	Down
BBA_08759	EJP62332	perilipin MPL1-like protein	-1.5186	0.349025	5.77811e-08	4.11731e-06	Down
BBA_03862	EJP67288	major facilitator superfamily transporter	-1.5162	0.349605	0.0131897	0.091446	Down
BBA_07940	EJP63135	maleylacetate reductase	-1.50645	0.351977	0.00758984	0.0636269	Down
BBA_07168	EJP63844	zinc finger protein RTS2	-1.50184	0.353103	6.99282e-05	0.00189244	Down
BBA_07933	EJP63128	hypothetical protein BBA_07933	-1.50049	0.353432	0.013853	0.0947641	Down
BBA_04501	EJP66561	C2H2 finger domain protein	-1.49991	0.353576	0.00495713	0.0469235	Down
BBA_01901	EJP68866	RBP protein	-1.4977	0.354117	0.00503146	0.047452	Down
BBA_06024	EJP64849	hypothetical protein BBA_06024	-1.49383	0.355069	0.000860176	0.0134752	Down
BBA_00893	EJP70024	Amino acid/polyamine transporter I	-1.48857	0.356365	1.43165e-10	1.81361e-08	Down
BBA_01667	EJP69702	forkhead domain-containing protein	-1.48693	0.356772	0.00804835	0.0656472	Down
BBA_05964	EJP65194	hypothetical protein BBA_05964	-1.48686	0.356789	0.00261761	0.0305566	Down
BBA_04940	EJP65969	RNase H domain containing protein	-1.48427	0.35743	0.00516701	0.0485075	Down
BBA_00528	EJP70898	short chain dehydrogenase	-1.47098	0.360736	0.00346319	0.0365218	Down
BBA_06693	EJP64311	hypothetical protein BBA_06693	-1.46497	0.362243	0.0103204	0.0776379	Down
BBA_07949	EJP63144	hypothetical protein BBA_07949	-1.46471	0.362309	0.004826	0.0460152	Down
BBA_03213	EJP67433	putative aspartic protease	-1.4631	0.362714	0.0216799	0.127119	Down
BBA_08061	EJP63050	UPF0075 domain protein	-1.46269	0.362816	0.000852368	0.0133733	Down
BBA_09708	EJP61363	hypothetical protein BBA_09708	-1.45768	0.364079	9.55734e-08	6.62621e-06	Down
BBA_08812	EJP62270	secreted lipase 1 precursor	-1.44904	0.366266	0.00871395	0.0693738	Down
BBA_02743	EJP68741	F-box domain-containing protein	-1.43433	0.370019	0.0123932	0.0874595	Down
BBA_06742	EJP64360	HET domain-containing protein	-1.43247	0.370496	1.80923e-11	2.73007e-09	Down
BBA_07634	EJP63458	MFS multidrug transporter	-1.42494	0.372436	1.05981e-06	5.87822e-05	Down
BBA_06115	EJP64940	RNA recognition domain-containing protein	-1.42032	0.373631	0.000123531	0.0029685	Down
BBA_08060	EJP63049	MFS monosaccharide transporter, putative	-1.41871	0.374048	0.00765203	0.0638873	Down
BBA_05120	EJP66149	vault protein inter-alpha-trypsin	-1.41526	0.374942	2.647e-11	3.87426e-09	Down
BBA_08703	EJP62377	hypothetical protein BBA_08703	-1.4127	0.375609	0.0353648	0.174536	Down
BBA_00212	EJP70582	proline dehydrogenase	-1.40582	0.377404	2.45738e-10	3.07502e-08	Down
BBA_03984	EJP67410	hypothetical protein BBA_03984	-1.40544	0.377504	0.00469274	0.045171	Down
BBA_04441	EJP66501	nuclear GTP-binding protein NUG1	-1.40081	0.378718	0.00235177	0.0279964	Down
BBA_09489	EJP61579	hypothetical protein BBA_09489	-1.40005	0.378917	0.0289644	0.154472	Down
BBA_01452	EJP69487	NMD3 family protein	-1.39911	0.379164	0.000465426	0.00848265	Down
BBA_04724	EJP66231	hypothetical protein BBA_04724	-1.39373	0.38058	0.0149393	0.10006	Down
BBA_02032	EJP68997	dipeptidyl peptidase III	-1.39285	0.380813	0.000542774	0.00958589	Down
BBA_09735	EJP61340	U3 small nucleolar RNA-associated protein	-1.39203	0.38103	6.99574e-05	0.00189244	Down
BBA_02924	EJP68028	NAF1 domain-containing protein	-1.3918	0.381089	0.00262202	0.0305733	Down
BBA_05995	EJP65225	ribosomal protein L10	-1.39116	0.381258	0.00213712	0.0262299	Down
BBA_04908	EJP65937	penicillin-binding protein	-1.38342	0.38331	0.0320575	0.163382	Down
BBA_06709	EJP64327	carboxylesterase-like protein	-1.3831	0.383395	2.13133e-08	1.72201e-06	Down
BBA_06740	EJP64358	hypothetical protein BBA_06740	-1.37772	0.384827	3.38573e-06	0.000155789	Down
BBA_00522	EJP70892	Urease, alpha subunit	-1.36485	0.388275	2.3042e-07	1.48701e-05	Down
BBA_07771	EJP63377	feebly protein	-1.3631	0.388746	0.0159405	0.104728	Down
BBA_03977	EJP67403	MAK16 protein, putative	-1.36209	0.389018	0.00193569	0.0244006	Down
BBA_02396	EJP68394	NADPH-dependent FMN reductase	-1.35722	0.390333	8.42019e-10	9.29028e-08	Down
BBA_03822	EJP67248	C6 transcription factor	-1.3546	0.391043	1.43753e-08	1.18004e-06	Down
BBA_04824	EJP66331	ABC transporter with duplicated ATPase domains	-1.34306	0.394185	2.18022e-09	2.10164e-07	Down
BBA_08901	EJP62104	Peptidase S8/S53, subtilisin/kexin/sedolisin	-1.33817	0.395521	0.00500546	0.0472502	Down
BBA_07130	EJP63806	kinesin light chain 1 and	-1.33812	0.395537	3.8939e-09	3.56338e-07	Down
BBA_06136	EJP64961	C-x8-C-x5-C-x3-H type zinc finger protein	-1.3362	0.396062	3.505e-05	0.00107038	Down
BBA_03093	EJP68197	U3 small nucleolar RNA associated protein	-1.33426	0.396595	0.00254941	0.029965	Down
BBA_04783	EJP66290	UDP-N-acetylmuramate--L-alanine ligase	-1.32294	0.399719	0.0365066	0.178078	Down
BBA_06706	EJP64324	Chitin-binding, domain 3	-1.32073	0.400332	0.0203143	0.121811	Down
BBA_00100	EJP70470	hypothetical protein BBA_00100	-1.31863	0.400916	0.00755734	0.0635075	Down
BBA_05866	EJP65096	SRP40 domain-containing protein	-1.31028	0.403243	0.00063862	0.0107601	Down
BBA_06795	EJP64413	hypothetical protein BBA_06795	-1.30574	0.404515	0.0242304	0.137061	Down
BBA_06556	EJP64562	DEAD/DEAH box helicase	-1.30367	0.405094	0.00415106	0.0416363	Down
BBA_01976	EJP68941	down-regulated in metastasis	-1.30287	0.405319	0.0214185	0.126209	Down
BBA_03071	EJP68175	hydrophobin-like protein	-1.30086	0.405884	0.0306685	0.159316	Down
BBA_06732	EJP64350	MYB DNA-binding domain-containing protein	-1.2992	0.406353	0.00134395	0.0185616	Down
BBA_06999	EJP63994	hypothetical protein BBA_06999	-1.29889	0.406438	0.000306546	0.00624101	Down
BBA_04450	EJP66510	aspartic-type endopeptidase	-1.29521	0.407477	2.88363e-05	0.000916066	Down
BBA_08493	EJP62582	Acyl-CoA N-acyltransferase	-1.29174	0.408457	3.7385e-08	2.81139e-06	Down
BBA_02325	EJP68323	sugar 1,4-lactone oxidase	-1.29085	0.40871	0.0115835	0.083234	Down
BBA_00626	EJP70996	amidohydrolase family protein	-1.28195	0.411238	1.08312e-09	1.1577e-07	Down
BBA_02421	EJP68419	ankyrin repeat and zinc finger domain-containing protein	-1.27547	0.41309	7.58089e-05	0.00201001	Down
BBA_03821	EJP67247	N,N-dimethylglycine oxidase	-1.27481	0.413279	0.0368598	0.179087	Down
BBA_06508	EJP64514	hypothetical protein BBA_06508	-1.27466	0.413322	0.00481753	0.0460152	Down
BBA_09303	EJP61741	hypothetical protein BBA_09303	-1.26723	0.415457	0.0232998	0.133938	Down
BBA_05949	EJP65179	dihydrouridine synthase	-1.26417	0.416338	0.00272415	0.031197	Down
BBA_07911	EJP63106	18S rRNA biogenesis protein RCL1	-1.25866	0.417933	3.8304e-06	0.000173911	Down
BBA_03057	EJP68161	hypothetical protein BBA_03057	-1.25397	0.419292	0.00460374	0.0445651	Down
BBA_04502	EJP66562	patatin-like phospholipase	-1.24614	0.421576	0.00289128	0.0324234	Down
BBA_07462	EJP63536	phosphoribosyl transferase domain protein	-1.23956	0.423501	4.74631e-05	0.00137576	Down
BBA_03683	EJP67109	2OG-Fe(II) oxygenase family oxidoreductase	-1.23807	0.42394	0.0094309	0.0730447	Down
BBA_06250	EJP64681	transcription factor TamA	-1.23736	0.424149	3.92419e-09	3.56338e-07	Down
BBA_07162	EJP63838	rRNA processing protein	-1.2364	0.42443	0.00174931	0.0226352	Down
BBA_00319	EJP70689	Peptidase S8	-1.22367	0.428192	0.000671981	0.0112117	Down
BBA_06942	EJP64238	MFS multidrug transporter, putative	-1.22265	0.428496	0.000833495	0.0131827	Down
BBA_09052	EJP62004	restless-like transposase	-1.22239	0.428573	2.4957e-07	1.59058e-05	Down
BBA_04539	EJP66599	ribosome biogenesis protein Brx1	-1.22209	0.428661	0.00339523	0.0360273	Down
BBA_02804	EJP67908	TRAUB domain-containing protein	-1.22153	0.428828	8.74621e-06	0.000357549	Down
BBA_07176	EJP63852	hypothetical protein BBA_07176	-1.22087	0.429025	0.0300986	0.157733	Down
BBA_08584	EJP62500	diphthamide biosynthesis protein	-1.22043	0.429155	0.0146311	0.098401	Down
BBA_01528	EJP69563	frequency clock protein	-1.22	0.429281	9.44334e-05	0.00237495	Down
BBA_02812	EJP67916	NADH-ubiquinone oxidoreductase 30.4 kDa subunit	-1.21784	0.429925	2.58003e-07	1.63418e-05	Down
BBA_09428	EJP61656	peptidase family M3	-1.21649	0.430329	2.38858e-06	0.000115287	Down
BBA_09806	EJP61229	C2H2 transcription factor	-1.21572	0.430557	0.0205017	0.122583	Down
BBA_02002	EJP68967	F-box domain containing protein	-1.21556	0.430606	0.000139382	0.00327194	Down
BBA_07281	EJP63637	urea active transporter	-1.20846	0.432729	7.87629e-05	0.0020611	Down
BBA_04175	EJP66882	kynurenine 3-monooxygenase	-1.20518	0.433715	0.0118994	0.0849354	Down
BBA_00752	EJP69883	linker histone H1 and H5 family protein	-1.20425	0.433995	0.0452073	0.204259	Down
BBA_00384	EJP70754	hypothetical protein BBA_00384	-1.19969	0.435368	5.70925e-09	4.96463e-07	Down
BBA_01229	EJP70360	C2H2 transcription factor (TFIIIA), putative	-1.1984	0.435758	0.000327454	0.00658652	Down
BBA_03368	EJP67588	amino acid permease	-1.19251	0.437541	0.000301265	0.00618222	Down
BBA_07302	EJP63658	GMP synthase	-1.19047	0.438161	4.48252e-07	2.6434e-05	Down
BBA_04565	EJP66625	LMW6DL protein	-1.18725	0.439139	0.00314786	0.0343967	Down
BBA_03570	EJP67790	hypothetical protein BBA_03570	-1.18662	0.439329	0.00639563	0.0564278	Down
BBA_02522	EJP68520	60S ribosomal subunit assembly/export protein LOC1	-1.1748	0.442945	0.00201501	0.0250316	Down
BBA_04568	EJP66628	arrestin domain-containing protein	-1.172	0.443806	2.67404e-08	2.11064e-06	Down
BBA_03241	EJP67461	p60 domain-containing protein	-1.16811	0.445005	0.00812929	0.0660449	Down
BBA_03085	EJP68189	calcipressin -like protein	-1.16516	0.445914	0.00491807	0.046683	Down
BBA_08630	EJP62409	kinesin family protein	-1.15474	0.449146	2.66903e-05	0.000861223	Down
BBA_03853	EJP67279	hypothetical protein BBA_03853	-1.1536	0.449503	0.000414643	0.00776396	Down
BBA_04826	EJP66333	aspartate-tRNA ligase	-1.15018	0.450569	3.18382e-08	2.45633e-06	Down
BBA_02491	EJP68489	rho-related gtp-binding protein rhoe	-1.14679	0.451628	0.0280207	0.151119	Down
BBA_05049	EJP66078	hypothetical protein BBA_05049	-1.14527	0.452104	4.24649e-08	3.11238e-06	Down
BBA_05885	EJP65115	FAD binding domain-containing protein	-1.14359	0.452631	4.34957e-08	3.16532e-06	Down
BBA_00513	EJP70883	hypothetical protein BBA_00513	-1.14179	0.453197	0.00226655	0.027265	Down
BBA_01687	EJP69722	3-isopropylmalate dehydratase	-1.14173	0.453215	0.0399126	0.187864	Down
BBA_07460	EJP63534	hypothetical protein BBA_07460	-1.14094	0.453463	2.39315e-06	0.000115287	Down
BBA_07218	EJP63894	Ebp2p-like protein	-1.12994	0.456934	0.000245248	0.00526462	Down
BBA_02405	EJP68403	RNA recognition domain-containing protein	-1.12964	0.457031	0.00101539	0.0150562	Down
BBA_06921	EJP64217	tripeptidyl peptidase A	-1.12724	0.457789	0.00482315	0.0460152	Down
BBA_04101	EJP66808	3&apos;5&apos;-cyclic nucleotide phosphodiesterase	-1.12586	0.458227	1.32427e-05	0.000492333	Down
BBA_05132	EJP65721	hypothetical protein BBA_05132	-1.1223	0.45936	6.63469e-07	3.76695e-05	Down
BBA_05141	EJP65730	putative NDT80 protein	-1.12162	0.459577	0.0351757	0.173779	Down
BBA_03301	EJP67521	homocitrate synthase	-1.12075	0.459854	0.0124337	0.0875649	Down
BBA_07524	EJP63598	SDA1 protein, required for normal organization of the actin cytoskeleton	-1.12031	0.459996	0.00398416	0.0404767	Down
BBA_05739	EJP65408	dibenzothiophene desulfurization enzyme A	-1.11815	0.460684	0.00720373	0.0613915	Down
BBA_07936	EJP63131	hypothetical protein BBA_07936	-1.11628	0.461281	0.04336	0.198447	Down
BBA_09519	EJP61551	phosphotransferase enzyme family protein	-1.10645	0.464436	0.00701006	0.0603193	Down
BBA_07022	EJP64017	A49-like RNA polymerase I associated factor	-1.10264	0.465665	5.43674e-05	0.00154533	Down
BBA_00164	EJP70534	WLM domain-containing protein	-1.10075	0.466275	7.85937e-05	0.0020611	Down
BBA_07724	EJP63330	pre-mRNA-splicing factor cwc24	-1.10041	0.466385	0.0106651	0.0790713	Down
BBA_07392	EJP63748	ribosome biogenesis protein SSF1	-1.09542	0.467999	0.000758886	0.0122582	Down
BBA_08984	EJP62060	ankyrin repeat-containing protein	-1.09436	0.468345	0.000837375	0.0131827	Down
BBA_08936	EJP62139	pre-rRNA-processing protein ESF1	-1.09169	0.469211	1.42256e-05	0.000515791	Down
BBA_03921	EJP67347	20S-pre-rRNA D-site endonuclease NOB1	-1.09131	0.469334	0.0228276	0.132037	Down
BBA_07542	EJP63616	hypothetical protein BBA_07542	-1.08937	0.469968	1.93112e-05	0.000666126	Down
BBA_04144	EJP66851	nuclear protein involved in pre-rRNA processing, putative	-1.07952	0.473185	0.00218499	0.0265642	Down
BBA_03118	EJP68222	von Willebrand factor type A domain-containing protein	-1.07812	0.473646	0.000444537	0.00817455	Down
BBA_03831	EJP67257	arsenic resistance protein ArsH, putative	-1.07775	0.473768	0.0159424	0.104728	Down
BBA_00049	EJP70419	transporter-like protein	-1.07644	0.474199	0.0173603	0.109892	Down
BBA_01883	EJP68848	hypothetical protein BBA_01883	-1.07555	0.47449	0.00773806	0.0641877	Down
BBA_02027	EJP68992	base excision DNA repair protein	-1.07046	0.476167	0.00347404	0.0365987	Down
BBA_06221	EJP64652	putative HFM1/MER3 protein	-1.07039	0.47619	4.56414e-07	2.67615e-05	Down
BBA_10067	EJP61002	DSBA-like thioredoxin domain protein	-1.06963	0.476443	1.82257e-05	0.000636103	Down
BBA_02987	EJP68091	suppressor of Mek1	-1.06788	0.477021	0.0022885	0.0274005	Down
BBA_02858	EJP67962	mucin-like protein	-1.06662	0.477437	0.01194	0.0849864	Down
BBA_07786	EJP63186	calcium-translocating P-type ATPase	-1.06287	0.47868	0.0104262	0.0780053	Down
BBA_04354	EJP66414	Isy1-like splicing family protein	-1.06019	0.479571	0.000312972	0.00633414	Down
BBA_00405	EJP70775	BTB/POZ domain containing protein	-1.05979	0.479704	0.0237204	0.135295	Down
BBA_05433	EJP65564	pantothenate transporter liz1	-1.05943	0.479822	0.0349814	0.173172	Down
BBA_04064	EJP66771	allantoate permease	-1.05863	0.480088	1.75872e-06	9.20728e-05	Down
BBA_00420	EJP70790	hypothetical protein BBA_00420	-1.05517	0.481241	6.34583e-05	0.00175511	Down
BBA_05279	EJP65868	PX domain-containing protein	-1.05436	0.481511	0.0031809	0.0346033	Down
BBA_00108	EJP70478	hypothetical protein BBA_00108	-1.05386	0.481677	0.00188013	0.0239058	Down
BBA_05233	EJP65822	hypothetical protein BBA_05233	-1.05227	0.482208	0.0349767	0.173172	Down
BBA_03054	EJP68158	pheromone-regulated membrane protein	-1.05117	0.482575	0.00861169	0.0689809	Down
BBA_08526	EJP62615	metalloprotease-like protein	-1.05023	0.482892	0.0202741	0.121656	Down
BBA_02196	EJP69161	nuc-1 negative regulatory protein preg	-1.04496	0.484658	0.000435577	0.00803952	Down
BBA_09289	EJP61727	Pectin lyase fold/virulence factor	-1.0395	0.486497	1.17897e-05	0.00044972	Down
BBA_07118	EJP63794	bacterial-type extracellular deoxyribonuclease	-1.03815	0.48695	1.21444e-05	0.000461532	Down
BBA_04348	EJP66408	wd-repeat protein	-1.03654	0.487494	0.0336849	0.169349	Down
BBA_08997	EJP62073	high-affinity methionine permease	-1.03524	0.487934	0.0445395	0.202123	Down
BBA_04997	EJP66026	hypothetical protein BBA_04997	-1.03167	0.489142	7.68349e-06	0.000319058	Down
BBA_10105	EJP60951	nonribosomal peptide synthase	-1.03112	0.489331	0.000182949	0.00411675	Down
BBA_09267	EJP61776	hypothetical protein BBA_09267	-1.02822	0.490315	0.0205919	0.122774	Down
BBA_06273	EJP64704	OPT oligopeptide transporter	-1.0238	0.49182	0.00636978	0.0563922	Down
BBA_03036	EJP68140	methyltransferase domain-containing protein	-1.02159	0.492573	0.00319183	0.0346373	Down
BBA_04241	EJP66948	phosphoesterase-like protein	-1.02143	0.492629	0.0291475	0.155045	Down
BBA_02932	EJP68036	General substrate transporter	-1.01839	0.493666	0.0341143	0.170588	Down
BBA_03454	EJP67674	DNA repair protein RAD14	-1.01757	0.493949	0.000874136	0.0135882	Down
BBA_04003	EJP66710	DEAD/DEAH box helicase	-1.01415	0.495119	3.05092e-05	0.000957354	Down
BBA_07393	EJP63749	DEAD/DEAH box helicase	-1.01377	0.495251	0.014387	0.09725	Down
BBA_02003	EJP68968	RNase H domain containing protein	-1.01298	0.495523	0.0177072	0.1114	Down
BBA_05837	EJP65067	WD domain-containing protein	-1.01147	0.496041	0.000193702	0.00430626	Down
BBA_06708	EJP64326	hypothetical protein BBA_06708	-1.00714	0.497531	4.23067e-05	0.00125829	Down
BBA_03357	EJP67577	hypothetical protein BBA_03357	-1.00537	0.498143	0.000449895	0.00825826	Down
BBA_09119	EJP61963	phosphoesterase-like protein	-1.00452	0.498437	7.89409e-05	0.0020611	Down
BBA_07117	EJP63793	glycosyl hydrolase family 16	-1.00282	0.499023	0.0268377	0.147027	Down
BBA_09523	EJP61555	FAD binding domain-containing protein	-Inf	0	0.0418147	0.193532	Down
BBA_01103	EJP70234	ABC transporter	1.00152	2.00211	0.000154178	0.00353919	Up
BBA_01536	EJP69571	hypothetical protein BBA_01536	1.00368	2.0051	0.00928476	0.0724494	Up
BBA_03501	EJP67721	cyclopropane-fatty-acyl-phospholipid synthase	1.00659	2.00916	0.000115599	0.00279096	Up
BBA_03331	EJP67551	lipase/serine esterase	1.00713	2.0099	0.000943433	0.0142781	Up
BBA_04184	EJP66891	hypothetical protein BBA_04184	1.0078	2.01084	0.000435627	0.00803952	Up
BBA_05683	EJP65352	hypothetical protein BBA_05683	1.00805	2.01119	2.87202e-05	0.00091521	Up
BBA_00095	EJP70465	oxidoreductase molybdopterin binding domain-containing protein	1.01029	2.01432	4.30249e-05	0.00127227	Up
BBA_05366	EJP65497	hypothetical protein BBA_05366	1.01256	2.01749	0.00482978	0.0460152	Up
BBA_00565	EJP70935	annexin-like protein	1.01486	2.0207	1.08231e-05	0.000419078	Up
BBA_00859	EJP69990	Putative Zn(II)2Cys6 transcription factor	1.01548	2.02157	3.67683e-06	0.00016768	Up
BBA_02432	EJP68430	triacylglycerol lipase	1.01921	2.02681	2.47941e-05	0.000818047	Up
BBA_07175	EJP63851	FAD dependent oxidoreductase domain containing protein	1.02083	2.02909	0.00181483	0.0232484	Up
BBA_05887	EJP65117	gamma-glutamyltranspeptidase	1.02089	2.02916	5.69942e-05	0.00160664	Up
BBA_01903	EJP68868	adenosylhomocysteinase	1.02104	2.02939	8.19626e-05	0.00212378	Up
BBA_06446	EJP64452	hypothetical protein BBA_06446	1.02192	2.03062	0.00290119	0.032499	Up
BBA_01281	EJP69316	hypothetical protein BBA_01281	1.02702	2.03781	1.08174e-05	0.000419078	Up
BBA_07326	EJP63682	phosphoglycerate kinase	1.02988	2.04185	0.00400007	0.040558	Up
BBA_06116	EJP64941	CAP22 protein	1.03633	2.05101	6.22824e-05	0.00173192	Up
BBA_00792	EJP69923	beta-1, 3 exoglucanase precursor	1.04326	2.06088	0.00145143	0.019622	Up
BBA_02762	EJP67866	sugar transporter	1.04504	2.06343	0.0379679	0.182055	Up
BBA_00448	EJP70818	hypothetical protein BBA_00448	1.04537	2.06389	0.00200464	0.0249329	Up
BBA_01406	EJP69441	amidase-like protein	1.04599	2.06478	2.34005e-06	0.000114339	Up
BBA_06082	EJP64907	ATP synthase F0	1.04796	2.06761	3.44216e-07	2.10238e-05	Up
BBA_03435	EJP67655	NAPE-hydrolyzing phospholipase D	1.05004	2.07059	7.03461e-05	0.00189454	Up
BBA_05626	EJP65295	phospholipid methyltransferase	1.05069	2.07152	0.0130556	0.0906382	Up
BBA_05010	EJP66039	polysaccharide lyase family 8 protein	1.05455	2.07707	0.00112467	0.0162689	Up
BBA_03852	EJP67278	penicillin-binding protein	1.05462	2.07717	0.0156361	0.103319	Up
BBA_05371	EJP65502	2-nitropropane dioxygenase	1.05502	2.07775	1.89884e-06	9.86981e-05	Up
BBA_09882	EJP61180	integral membrane protein	1.05726	2.08097	1.77617e-07	1.16084e-05	Up
BBA_03291	EJP67511	MFS monocarboxylate transporter	1.06576	2.09327	5.60303e-07	3.24817e-05	Up
BBA_05856	EJP65086	integral membrane protein	1.06906	2.09806	1.08275e-06	5.97315e-05	Up
BBA_08376	EJP62661	MAC1 interacting protein	1.06984	2.09919	1.20088e-06	6.45144e-05	Up
BBA_05387	EJP65518	FAD binding domain-containing protein	1.07001	2.09945	0.00657055	0.0575259	Up
BBA_05265	EJP65854	hypothetical protein BBA_05265	1.07436	2.10579	9.63154e-05	0.00241636	Up
BBA_05386	EJP65517	major facilitator superfamily transporter	1.07786	2.1109	0.000132253	0.0031486	Up
BBA_06132	EJP64957	tat pathway signal sequence	1.07892	2.11246	4.89473e-07	2.85368e-05	Up
BBA_01739	EJP69774	hypothetical protein BBA_01739	1.07993	2.11393	2.57105e-05	0.000840178	Up
BBA_07611	EJP63435	non-ribosomal peptide synthetase	1.08091	2.11537	0.0200804	0.12099	Up
BBA_02459	EJP68457	hypothetical protein BBA_02459	1.08618	2.12312	1.68634e-05	0.000594625	Up
BBA_00551	EJP70921	major facilitator superfamily transporter	1.08701	2.12434	1.93456e-05	0.000666126	Up
BBA_03772	EJP67198	NADPH oxidase regulator NoxR	1.09471	2.1357	0.000493767	0.00885759	Up
BBA_00952	EJP70083	peroxisomal enzyme	1.09531	2.13659	2.83487e-07	1.75233e-05	Up
BBA_09950	EJP61113	hypothetical protein BBA_09950	1.09858	2.14144	0.0449641	0.203519	Up
BBA_03137	EJP68241	putative metacaspase	1.0991	2.14221	2.03109e-05	0.000692391	Up
BBA_00047	EJP70417	Cel5b-like protein	1.0994	2.14266	0.00958246	0.0735151	Up
BBA_09491	EJP61581	hypothetical protein BBA_09491	1.10101	2.14505	7.71138e-06	0.000319058	Up
BBA_05891	EJP65121	hypothetical protein BBA_05891	1.10114	2.14524	1.37598e-05	0.000502454	Up
BBA_05508	EJP65639	hypothetical protein BBA_05508	1.10383	2.14925	0.0255118	0.142038	Up
BBA_00318	EJP70688	AMP-binding enzyme, putative	1.10592	2.15237	9.15908e-06	0.000372942	Up
BBA_03832	EJP67258	PAN domain containing protein	1.10623	2.15282	0.0169914	0.108292	Up
BBA_05777	EJP65446	putative HRQ family protein 2	1.10669	2.15351	5.76891e-06	0.000250825	Up
BBA_01679	EJP69714	hypothetical protein BBA_01679	1.10783	2.15521	0.0365128	0.178078	Up
BBA_08183	EJP62796	laccase 2	1.10945	2.15764	0.0126045	0.0882231	Up
BBA_02995	EJP68099	branched-chain amino acid aminotransferase	1.11634	2.16796	2.73136e-07	1.70893e-05	Up
BBA_04320	EJP67027	hypothetical protein BBA_04320	1.11775	2.17008	0.00986851	0.0751193	Up
BBA_04473	EJP66533	hypothetical protein BBA_04473	1.11817	2.17072	0.00851407	0.0684662	Up
BBA_06776	EJP64394	hypothetical protein BBA_06776	1.1206	2.17437	1.96549e-06	0.00010084	Up
BBA_08178	EJP62791	hydantoinase B/oxoprolinase	1.12231	2.17695	1.04621e-07	7.13146e-06	Up
BBA_08466	EJP62555	hypothetical protein BBA_08466	1.12294	2.17791	0.001806	0.0231932	Up
BBA_00771	EJP69902	Ankyrin repeat protein	1.1231	2.17815	0.00769354	0.0640337	Up
BBA_04759	EJP66266	zinc-binding dehydrogenase	1.12444	2.18017	2.70827e-07	1.70488e-05	Up
BBA_02684	EJP68682	acetoacetate-CoA ligase	1.12688	2.18387	1.04946e-07	7.13146e-06	Up
BBA_02516	EJP68514	Malate synthase, glyoxysomal	1.12777	2.18521	0.000760988	0.0122582	Up
BBA_05823	EJP65053	NAD-dependent epimerase/dehydratase	1.12986	2.18838	0.0210998	0.124859	Up
BBA_09131	EJP61975	hypothetical protein BBA_09131	1.13292	2.19301	0.0427093	0.196344	Up
BBA_02833	EJP67937	phosphoenolpyruvate carboxykinase	1.13419	2.19495	1.16043e-06	6.33362e-05	Up
BBA_08176	EJP62789	mitochondrial CorA family metal ion transporter	1.1344	2.19527	0.0479605	0.212002	Up
BBA_04062	EJP66769	FAD binding domain-containing protein	1.13991	2.20367	0.00267583	0.0309197	Up
BBA_07593	EJP63417	stress responsive A/B Barrel domain-containing protein	1.14142	2.20598	7.32528e-08	5.14827e-06	Up
BBA_02602	EJP68600	cell wall protein	1.14316	2.20865	0.0177901	0.111716	Up
BBA_07147	EJP63823	hypothetical protein BBA_07147	1.14483	2.21119	0.0368557	0.179087	Up
BBA_05089	EJP66118	putative signal peptide-containing protein	1.14908	2.21772	0.00764057	0.0638485	Up
BBA_01069	EJP70200	fatty-acid amide hydrolase	1.15376	2.22492	5.51777e-08	3.95929e-06	Up
BBA_02896	EJP68000	ATP/GTP-binding protein	1.15383	2.22504	3.13512e-06	0.000146225	Up
BBA_04988	EJP66017	aminotransferase class I and II	1.15412	2.22548	1.17241e-07	7.86281e-06	Up
BBA_09299	EJP61737	sarcosine oxidase	1.15856	2.23234	1.15831e-05	0.000443485	Up
BBA_06081	EJP64906	allantoate permease	1.16485	2.2421	0.000279907	0.00586147	Up
BBA_02503	EJP68501	3-hydroxybutyryl-CoA dehydrogenase	1.16631	2.24438	1.31495e-07	8.70499e-06	Up
BBA_01713	EJP69748	pyridine nucleotide-disulfide oxidoreductase, putative	1.16949	2.24932	3.02902e-05	0.000953399	Up
BBA_02857	EJP67961	phenazine biosynthesis protein phzF	1.17212	2.25342	0.000379629	0.00728106	Up
BBA_06941	EJP64237	short-chain type dehydrogenase, putative	1.17631	2.25997	4.57417e-05	0.0013334	Up
BBA_08650	EJP62429	hypothetical protein BBA_08650	1.17845	2.26334	4.05041e-07	2.40239e-05	Up
BBA_01814	EJP68779	oxidoreductase, 2OG-Fe(II) oxygenase family	1.18418	2.27233	0.00646524	0.0567492	Up
BBA_08224	EJP62837	hypothetical protein BBA_08224	1.18585	2.27497	1.18499e-06	6.39958e-05	Up
BBA_02195	EJP69160	glucoamylase I precursor	1.19167	2.28417	0.00357667	0.0374492	Up
BBA_07588	EJP63412	beta-eliminating lyase	1.19409	2.28801	0.00101469	0.0150562	Up
BBA_05376	EJP65507	alpha-amylase A type-3	1.19807	2.29433	2.80854e-07	1.74657e-05	Up
BBA_02815	EJP67919	ABC transporter	1.19928	2.29625	7.13109e-06	0.000303619	Up
BBA_08403	EJP62688	hypothetical protein BBA_08403	1.20086	2.29877	0.00567461	0.0518496	Up
BBA_01748	EJP69783	NADPH dehydrogenase	1.20407	2.30389	0.00171796	0.0224072	Up
BBA_08764	EJP62337	hypothetical protein BBA_08764	1.20508	2.3055	0.00335075	0.0357774	Up
BBA_05183	EJP65772	Cel3e-like protein	1.20542	2.30604	2.36227e-08	1.87901e-06	Up
BBA_03664	EJP67090	amine oxidase	1.21003	2.31343	0.0214976	0.126483	Up
BBA_02429	EJP68427	alpha glucoside transporter	1.21004	2.31344	8.42225e-09	7.08366e-07	Up
BBA_05833	EJP65063	major facilitator superfamily transporter	1.21263	2.3176	0.0319385	0.163209	Up
BBA_07869	EJP63269	nudix domain containing protein	1.22623	2.33955	0.0276926	0.150017	Up
BBA_04027	EJP66734	Arylsulfotransferase-like protein	1.228	2.34243	2.53384e-06	0.00012127	Up
BBA_01740	EJP69775	hypothetical protein BBA_01740	1.22963	2.34507	1.14825e-06	6.30066e-05	Up
BBA_06352	EJP64783	glycoside hydrolase family 76	1.23455	2.35308	0.0162349	0.105702	Up
BBA_09647	EJP61404	C-14 sterol reductase, putative	1.23655	2.35634	2.80179e-08	2.1946e-06	Up
BBA_09778	EJP61273	hypothetical protein BBA_09778	1.23735	2.35764	0.0479314	0.211993	Up
BBA_02141	EJP69106	mannitol-1-phosphate dehydrogenase	1.23736	2.35766	0.00227383	0.0272886	Up
BBA_05167	EJP65756	peptidase family M48	1.23779	2.35836	0.00033017	0.0065912	Up
BBA_07988	EJP62977	hypothetical protein BBA_07988	1.24077	2.36324	0.0109589	0.0804361	Up
BBA_08503	EJP62592	hypothetical protein BBA_08503	1.24683	2.3732	9.26554e-06	0.000374137	Up
BBA_09468	EJP61558	WSC domain-containing protein	1.24718	2.37377	1.08252e-09	1.1577e-07	Up
BBA_01656	EJP69691	amine oxidase	1.24991	2.37826	0.00183653	0.0233804	Up
BBA_00572	EJP70942	glyoxalase/bleomycin resistance protein/dioxygenase	1.25076	2.37968	0.0164772	0.106536	Up
BBA_03338	EJP67558	Bys1 family protein	1.25229	2.3822	0.00668777	0.0584525	Up
BBA_08392	EJP62677	salicylate hydroxylase	1.25622	2.38868	3.97446e-08	2.95521e-06	Up
BBA_03618	EJP67838	hypothetical protein BBA_03618	1.25717	2.39026	0.0263537	0.145384	Up
BBA_02764	EJP67868	phenazine biosynthesis-like protein	1.26549	2.40409	3.7895e-07	2.27392e-05	Up
BBA_04700	EJP66207	hypothetical protein BBA_04700	1.26735	2.40719	6.09524e-06	0.000262787	Up
BBA_01494	EJP69529	lipase 1 precursor	1.26797	2.40822	0.0165581	0.106848	Up
BBA_01863	EJP68828	hypothetical protein BBA_01863	1.26915	2.41019	0.00701305	0.0603193	Up
BBA_03216	EJP67436	helix-turn-helix domain-containing protein	1.27062	2.41265	0.0452586	0.204401	Up
BBA_05882	EJP65112	hypothetical protein BBA_05882	1.27637	2.42229	0.000780144	0.0125275	Up
BBA_09881	EJP61179	sterigmatocystin 8-O-methyltransferase	1.27726	2.42378	6.81691e-10	7.77204e-08	Up
BBA_00017	EJP70387	ABC transporter	1.27833	2.42557	0.00552081	0.0508063	Up
BBA_00935	EJP70066	putative histidine acid phosphatase	1.2785	2.42587	0.00222759	0.0269481	Up
BBA_07811	EJP63211	Cytochrome P450 CYP5099A1	1.28757	2.44116	3.75961e-05	0.00113463	Up
BBA_04583	EJP66643	putative aldehyde dehydrogenase	1.29218	2.44897	1.07352e-07	7.24694e-06	Up
BBA_05855	EJP65085	C6 zinc finger domain protein	1.29233	2.44924	2.21169e-09	2.10164e-07	Up
BBA_00238	EJP70608	chaperone protein hchA	1.29274	2.44993	4.00612e-07	2.38993e-05	Up
BBA_06336	EJP64767	hexose transporter-like protein	1.29315	2.45063	0.00225577	0.0271884	Up
BBA_02891	EJP67995	isoleucyl-tRNA synthetase ,cytoplasmic	1.29606	2.45558	1.16085e-09	1.19678e-07	Up
BBA_07675	EJP63281	hypothetical protein BBA_07675	1.30115	2.46425	2.21204e-09	2.10164e-07	Up
BBA_03160	EJP68264	dimeric dihydrodiol dehydrogenase	1.30432	2.46967	2.29966e-06	0.000112903	Up
BBA_08249	EJP62862	2OG-Fe(II) oxygenase superfamily protein	1.30574	2.47211	1.37551e-05	0.000502454	Up
BBA_08127	EJP62922	hypothetical protein BBA_08127	1.30654	2.47348	0.000177581	0.00401358	Up
BBA_00533	EJP70903	4-coumarate:coenzyme A ligase	1.30808	2.47612	0.00872834	0.0693738	Up
BBA_09602	EJP61466	hypothetical protein BBA_09602	1.31197	2.4828	0.039945	0.187908	Up
BBA_04394	EJP66454	major facilitator superfamily transporter	1.31242	2.48358	1.17486e-06	6.37841e-05	Up
BBA_07319	EJP63675	hypothetical protein BBA_07319	1.31511	2.48821	4.96367e-09	4.42889e-07	Up
BBA_02759	EJP67863	hypothetical protein BBA_02759	1.3272	2.50915	3.64401e-10	4.39897e-08	Up
BBA_04971	EJP66000	hypothetical protein BBA_04971	1.33136	2.5164	1.81308e-05	0.000634949	Up
BBA_00544	EJP70914	Major Facilitator Superfamily protein	1.33576	2.52408	0.000324724	0.00654616	Up
BBA_01149	EJP70280	alpha-1,3-mannosyltransferase CMT1	1.33899	2.52974	0.00082581	0.0130968	Up
BBA_09990	EJP61059	dipeptidyl aminopeptidase/acylaminoacyl peptidase	1.34491	2.54014	1.65133e-06	8.73416e-05	Up
BBA_07806	EJP63206	glutamate carboxypeptidase	1.34991	2.54896	2.10833e-06	0.00010553	Up
BBA_08745	EJP62318	cystathionine gamma-synthase	1.35046	2.54993	0.00135236	0.0186513	Up
BBA_06439	EJP64445	CipC protein	1.35137	2.55154	0.0126683	0.0885087	Up
BBA_08685	EJP62359	FkbM family methyltransferase	1.35292	2.55429	0.000234266	0.00508205	Up
BBA_04384	EJP66444	hypothetical protein BBA_04384	1.35309	2.55459	0.0355397	0.174987	Up
BBA_08039	EJP63028	shwachman-Bodian-Diamond syndrome protein	1.35363	2.55554	0.0350992	0.173521	Up
BBA_10010	EJP61051	Cytochrome P450 CYP542B2	1.3545	2.55708	3.0465e-08	2.36819e-06	Up
BBA_09959	EJP61092	hypothetical protein BBA_09959	1.3617	2.56988	0.00141809	0.0193241	Up
BBA_04690	EJP66197	Na,H/K antiporter P-type ATPase	1.36225	2.57086	2.26877e-11	3.3739e-09	Up
BBA_07402	EJP63758	kelch repeat protein	1.3769	2.59709	6.54699e-08	4.63301e-06	Up
BBA_06532	EJP64538	DUF500 domain protein	1.37907	2.60101	0.000994044	0.014847	Up
BBA_00445	EJP70815	hypothetical protein BBA_00445	1.38167	2.6057	0.00913902	0.0715297	Up
BBA_08628	EJP62407	Hsp70 family chaperone	1.38433	2.61051	0.0110842	0.0809247	Up
BBA_00800	EJP69931	hypothetical protein BBA_00800	1.38758	2.6164	6.70951e-09	5.7854e-07	Up
BBA_00672	EJP71042	putative glutathione S-transferase	1.38901	2.61898	9.55844e-11	1.25742e-08	Up
BBA_08402	EJP62687	monooxygenase-like protein	1.38981	2.62045	0.00408464	0.0410907	Up
BBA_02275	EJP69240	Cytochrome P450 CYP5202A1	1.40151	2.64179	0.0285741	0.153187	Up
BBA_05264	EJP65853	chitinase-like protein	1.40265	2.64387	0.0358527	0.175701	Up
BBA_07839	EJP63239	short chain dehydrogenase, putative	1.40756	2.65288	6.23034e-10	7.26472e-08	Up
BBA_08818	EJP62276	alkaline D-peptidase	1.41014	2.65762	0.00781458	0.0645616	Up
BBA_03813	EJP67239	late sexual development protein	1.41326	2.66338	0.00478768	0.0457841	Up
BBA_04288	EJP66995	hypothetical protein BBA_04288	1.41853	2.67312	8.22728e-06	0.000337681	Up
BBA_01783	EJP68748	secretory lipase	1.41871	2.67347	0.0461926	0.206958	Up
BBA_09474	EJP61564.1	Cytochrome P450 CYP53A11	1.42157	2.67877	3.68828e-07	2.2262e-05	Up
BBA_02823	EJP67927	Cytochrome P450 CYP504E1	1.43081	2.69598	0.001727	0.0224882	Up
BBA_04576	EJP66636	multicopper oxidase	1.43171	2.69766	0.010408	0.0779758	Up
BBA_08621	EJP62400	Axe2-like protein	1.43404	2.70202	4.20019e-12	7.19044e-10	Up
BBA_04613	EJP66673	pyridoxamine phosphate oxidase	1.44052	2.71419	1.07452e-10	1.39565e-08	Up
BBA_01949	EJP68914	hypothetical protein BBA_01949	1.44079	2.7147	1.04733e-05	0.000408618	Up
BBA_08175	EJP62788	evolved D-lactonohydrolase	1.44166	2.71632	0.0220592	0.128731	Up
BBA_08218	EJP62831	Acyl-CoA N-acyltransferase	1.4455	2.72357	3.71487e-10	4.43236e-08	Up
BBA_02408	EJP68406	Ankyrin repeat protein	1.44877	2.72975	4.38832e-10	5.17569e-08	Up
BBA_09856	EJP61198	hybrid PKS-NRPS protein	1.45144	2.73482	0.00106756	0.0156713	Up
BBA_07850	EJP63250	hypothetical protein BBA_07850	1.45471	2.74102	3.76901e-11	5.29778e-09	Up
BBA_02824	EJP67928	short chain dehydrogenase	1.45759	2.7465	0.000873779	0.0135882	Up
BBA_01322	EJP69357	carrier protein YMC1, mitochondrial	1.45877	2.74874	4.9116e-05	0.00141171	Up
BBA_05182	EJP65771	ATPase protein	1.46326	2.75732	5.12453e-11	7.01104e-09	Up
BBA_04048	EJP66755	putative succinate-fumarate transporter	1.46915	2.76858	5.69787e-09	4.96463e-07	Up
BBA_09929	EJP61124	hypothetical protein BBA_09929	1.46953	2.76931	0.0156474	0.103319	Up
BBA_00965	EJP70096	Cytochrome P450 CYP52T1	1.47487	2.77959	0.000269204	0.00568376	Up
BBA_05225	EJP65814	3-beta-hydroxysteroid-Delta(8), Delta(7)-isomerase	1.47986	2.78921	4.48322e-05	0.00131061	Up
BBA_06679	EJP64297	hypothetical protein BBA_06679	1.48102	2.79146	2.54098e-06	0.00012127	Up
BBA_08686	EJP62360	UDP-glucosyltransferase	1.48256	2.79443	9.74731e-06	0.000386723	Up
BBA_02276	EJP69241	tetratricopeptide repeat domain-containing protein	1.4857	2.80053	0.000380723	0.00728843	Up
BBA_09256	EJP61765	prephenate dehydratase	1.48802	2.80504	0.00708571	0.0606392	Up
BBA_09434	EJP61591	hypothetical protein BBA_09434	1.49012	2.80912	0.000809888	0.0129041	Up
BBA_07534	EJP63608	hypothetical protein BBA_07534	1.50138	2.83113	3.0411e-13	6.11858e-11	Up
BBA_04838	EJP66345	1-aminocyclopropane-1-carboxylate synthase	1.50386	2.836	0.00179126	0.0230616	Up
BBA_00093	EJP70463	methyltransferase domain-containing protein	1.50493	2.83811	0.023719	0.135295	Up
BBA_08777	EJP62235	glucoamylase-like protein	1.51167	2.8514	4.48445e-06	0.000199199	Up
BBA_03644	EJP67070	glycosyl hydrolase	1.51902	2.86596	1.47603e-09	1.48486e-07	Up
BBA_02114	EJP69079	mitochondrial phosphate carrier protein	1.5264	2.88066	2.8997e-07	1.78166e-05	Up
BBA_05096	EJP66125	hypothetical protein BBA_05096	1.53246	2.89278	0.0216543	0.127119	Up
BBA_06353	EJP64784	Cytochrome P450 CYP660A2	1.53425	2.89639	2.51614e-05	0.000824858	Up
BBA_05551	EJP65682	Beta-lactamase-type transpeptidase	1.5403	2.90855	5.89834e-12	9.60681e-10	Up
BBA_02382	EJP68380	Cytochrome P450 CYP52T1	1.54444	2.9169	0.00164075	0.0216398	Up
BBA_00614	EJP70984	fasciclin domain-containing protein	1.55161	2.93145	2.1943e-12	3.95013e-10	Up
BBA_02231	EJP69196	hypothetical protein BBA_02231	1.56084	2.95025	0.042412	0.195327	Up
BBA_02339	EJP68337	taurine catabolism dioxygenase TauD	1.56416	2.95706	0.00145572	0.0196541	Up
BBA_00967	EJP70098	polyketide synthase	1.57135	2.97182	3.53123e-05	0.00107519	Up
BBA_09744	EJP61307	O-methyltransferase-like protein	1.572	2.97317	2.04609e-06	0.000102916	Up
BBA_09487	EJP61577	hypothetical protein BBA_09487	1.57234	2.97386	8.29508e-14	1.85034e-11	Up
BBA_06360	EJP64791	Succinyl-CoA synthetase, beta subunit	1.57304	2.97532	9.53091e-06	0.000380532	Up
BBA_06744	EJP64362	hypothetical protein BBA_06744	1.57497	2.9793	1.11994e-09	1.17262e-07	Up
BBA_07745	EJP63351	Glycoside hydrolase, catalytic core	1.59708	3.02531	0.0216434	0.127119	Up
BBA_05625	EJP65294	metal ion transporter metal ion transporter	1.60175	3.03511	8.84814e-07	4.96124e-05	Up
BBA_02096	EJP69061	hypothetical protein BBA_02096	1.6082	3.0487	0.000306545	0.00624101	Up
BBA_00923	EJP70054	monocarboxylate transporter	1.61054	3.05367	1.10211e-12	2.09421e-10	Up
BBA_01397	EJP69432	ABC multidrug transporter, putative	1.61339	3.0597	0.0143691	0.0971927	Up
BBA_09128	EJP61972	Concanavalin A-like lectin/glucanase	1.61407	3.06115	0.0118139	0.0845348	Up
BBA_08601	EJP62517	hypothetical protein BBA_08601	1.61809	3.06968	0.000527513	0.00939724	Up
BBA_09431	EJP61588	hypothetical protein BBA_09431	1.62944	3.09392	0.000373929	0.00722577	Up
BBA_07810	EJP63210	ABC transporter	1.6321	3.09964	1.94162e-09	1.89742e-07	Up
BBA_00362	EJP70732	hypothetical protein BBA_00362	1.63935	3.11525	1.70417e-09	1.69772e-07	Up
BBA_04263	EJP66970	Bys1 family protein	1.64231	3.12165	0.000495665	0.00887612	Up
BBA_09455	EJP61612	hypothetical protein BBA_09455	1.65061	3.13967	0.000837648	0.0131827	Up
BBA_07838	EJP63238	hypothetical protein BBA_07838	1.65186	3.14239	8.95187e-08	6.24865e-06	Up
BBA_04917	EJP65946	mannosylphosphorylation protein MNN4	1.65477	3.14872	3.75363e-08	2.81139e-06	Up
BBA_10058	EJP60993	hypothetical protein BBA_10058	1.65482	3.14885	6.64474e-07	3.76695e-05	Up
BBA_03649	EJP67075	glucose-repressible protein	1.65566	3.15068	7.6653e-05	0.00202195	Up
BBA_07848	EJP63248	cyanovirin-N protein	1.65841	3.15668	0.00162496	0.0214591	Up
BBA_09603	EJP61467	transposase-like protein	1.66989	3.1819	0.0121858	0.0862931	Up
BBA_04268	EJP66975	hypothetical protein BBA_04268	1.67146	3.18536	0.00933757	0.0725855	Up
BBA_07814	EJP63214	phosphatidylserine decarboxylase family protein	1.67267	3.18805	5.81757e-07	3.33487e-05	Up
BBA_02558	EJP68556	ferulic acid esterase (FaeA)	1.67498	3.19315	2.20023e-08	1.76379e-06	Up
BBA_07842	EJP63242	cyanide hydratase	1.72822	3.3132	0.017184	0.109135	Up
BBA_08523	EJP62612	fungal specific transcription factor domain protein	1.73786	3.33541	7.0693e-05	0.0018989	Up
BBA_09777	EJP61272	hypothetical protein BBA_09777	1.74027	3.34098	0.04743	0.21041	Up
BBA_05778	EJP65447	hypothetical protein BBA_05778	1.74151	3.34385	0.00123068	0.0173939	Up
BBA_09905	EJP61159	hypothetical protein BBA_09905	1.75448	3.37404	2.05897e-05	0.000699572	Up
BBA_00603	EJP70973	AMP-binding enzyme	1.77313	3.41796	9.94623e-17	3.00171e-14	Up
BBA_03082	EJP68186	beta (1-3) glucanosyltransferase	1.77777	3.42895	0.0255405	0.142044	Up
BBA_05858	EJP65088	glycosyl hydrolase family 47 protein	1.79009	3.45837	5.76892e-07	3.32556e-05	Up
BBA_00284	EJP70654	hypothetical protein BBA_00284	1.79415	3.46811	0.0318631	0.163134	Up
BBA_06745	EJP64363	putative peroxisomal membrane protein	1.79778	3.47684	3.61787e-18	1.2801e-15	Up
BBA_05815	EJP65045	O-methyltransferase-like protein	1.80361	3.49094	0.0284163	0.152739	Up
BBA_06989	EJP63984	hypothetical protein BBA_06989	1.81501	3.51862	0.00405599	0.0408584	Up
BBA_02428	EJP68426	Cytochrome P450 CYP52G8	1.81627	3.5217	1.01225e-17	3.46224e-15	Up
BBA_07636	EJP63460	C6 transcription factor	1.84441	3.59106	0.0235402	0.134799	Up
BBA_07250	EJP63926	MAPEG family protein	1.85564	3.61914	0.00195313	0.0245301	Up
BBA_09286	EJP61795	oxygenase-like protein	1.85725	3.62315	9.79903e-06	0.000386723	Up
BBA_09838	EJP61220	hypothetical protein BBA_09838	1.87973	3.68007	0.035654	0.175129	Up
BBA_05436	EJP65567	hypothetical protein BBA_05436	1.88531	3.69432	9.31495e-05	0.00235421	Up
BBA_02933	EJP68037	carboxylesterase-like protein	1.88819	3.70169	0.0480319	0.212002	Up
BBA_06481	EJP64487	hypothetical protein BBA_06481	1.89372	3.71592	0.00439542	0.0430768	Up
BBA_09955	EJP61088	dsp1-1-like protein	1.8968	3.72386	0.0111041	0.0809247	Up
BBA_03476	EJP67696	NmrA-like family protein	1.91649	3.77504	0.0286114	0.153306	Up
BBA_06453	EJP64459	hypothetical protein BBA_06453	1.91782	3.77852	0.0405812	0.189533	Up
BBA_02873	EJP67977	sarcosine oxidase	1.92178	3.78889	0.0237842	0.135508	Up
BBA_04323	EJP67030	DUF1445 domain-containing protein	1.92969	3.80973	5.84006e-12	9.60681e-10	Up
BBA_08435	EJP62720	FAD binding domain-containing protein	1.93767	3.83085	3.24695e-08	2.48634e-06	Up
BBA_07807	EJP63207	taurine catabolism dioxygenase TauD	1.94342	3.84616	1.41995e-09	1.44259e-07	Up
BBA_02281	EJP69246	Zn-dependent alcohol dehydrogenases (ISS)	1.9581	3.88551	0.0398209	0.187565	Up
BBA_01257	EJP69292	mosquitocidal toxin protein	1.96258	3.89757	2.98072e-05	0.000941081	Up
BBA_08661	EJP62440	FMN-dependent dehydrogenase	1.96259	3.89761	0.0116916	0.0839524	Up
BBA_00934	EJP70065	sterigmatocystin 8-O-methyltransferase	1.96473	3.9034	9.00799e-19	3.30111e-16	Up
BBA_04974	EJP66003	aminotransferase family protein (LolT)	1.98686	3.96373	5.13791e-05	0.00147263	Up
BBA_03078	EJP68182	Cytochrome P450 CYP68N1	1.99322	3.98124	0.000984495	0.0147258	Up
BBA_03505	EJP67725	Beta-lactamase-type transpeptidase	2.00223	4.0062	2.86928e-15	7.54916e-13	Up
BBA_04139	EJP66846	glutamate 5-kinase	2.0023	4.00638	2.7611e-21	1.2878e-18	Up
BBA_07030	EJP64025	Zn(II)2Cys6 transcription factor	2.00292	4.00811	3.82663e-19	1.51019e-16	Up
BBA_02457	EJP68455	agglutinin isolectin VI precursor	2.00385	4.01069	7.21234e-06	0.000305809	Up
BBA_08787	EJP62245	ATP-binding cassette sub-family G member 5	2.0183	4.05105	0.000109815	0.00268929	Up
BBA_02118	EJP69083	phosphatidylcholine-hydrolyzing phospholipase C	2.0284	4.07951	2.04687e-07	1.3293e-05	Up
BBA_10012	EJP61053	FluG domain-containing protein	2.05061	4.14281	0.0306742	0.159316	Up
BBA_08758	EJP62331	FAD dependent oxidoreductase	2.08199	4.23392	0.000593871	0.0102693	Up
BBA_05176	EJP65765	hybrid NRPS/PKS enzyme, putative	2.08986	4.25708	4.12143e-11	5.71486e-09	Up
BBA_09441	EJP61598	NsdD protein	2.11502	4.33196	0.0365147	0.178078	Up
BBA_09208	EJP61871	dimethylaniline monooxygenase	2.12372	4.35817	5.52871e-09	4.89052e-07	Up
BBA_09216	EJP61879	hypothetical protein BBA_09216	2.13153	4.38183	0.000107642	0.00264871	Up
BBA_09627	EJP61437	hypothetical protein BBA_09627	2.14031	4.40855	3.41144e-05	0.00105755	Up
BBA_04409	EJP66469	hypothetical protein BBA_04409	2.15319	4.4481	0.0197544	0.11987	Up
BBA_07815	EJP63215	Cytochrome P450 CYP504B10	2.16062	4.47106	4.40955e-15	1.10357e-12	Up
BBA_03973	EJP67399	hypothetical protein BBA_03973	2.18006	4.53172	0.00274135	0.031359	Up
BBA_06445	EJP64451	hypothetical protein BBA_06445	2.20347	4.60585	0.00032894	0.00658652	Up
BBA_06684	EJP64302	WSC domain-containing protein	2.22269	4.66762	0.00393276	0.0401533	Up
BBA_07364	EJP63720	tat pathway signal sequence	2.22922	4.68881	0.000132194	0.0031486	Up
BBA_06443	EJP64449	hypothetical protein BBA_06443	2.24869	4.7525	0.00057171	0.0100108	Up
BBA_00687	EJP69818	hypothetical protein BBA_00687	2.26036	4.79111	0.0295535	0.156394	Up
BBA_06267	EJP64698	flavin-binding monooxygenase, putative	2.2677	4.81556	0.0454995	0.204857	Up
BBA_07340	EJP63696	monocarboxylate permease-like protein	2.26858	4.8185	0.00396866	0.0403592	Up
BBA_06725	EJP64343	ABC transporter	2.28049	4.85843	1.28497e-07	8.56172e-06	Up
BBA_09211	EJP61874	exo-beta-1,3-glucanase, putative	2.30052	4.92634	6.60274e-05	0.00181637	Up
BBA_10072	EJP60973	basic proline-rich protein	2.30494	4.94148	0.0328691	0.166307	Up
BBA_09837	EJP61219	TPR repeat protein	2.32007	4.99357	0.010763	0.0795669	Up
BBA_07813	EJP63213	hypothetical protein BBA_07813	2.33964	5.06175	2.68076e-11	3.87426e-09	Up
BBA_02945	EJP68049	LysM domain-containing protein	2.3494	5.09613	0.00741417	0.0625117	Up
BBA_08744	EJP62317	aspartokinase-like protein	2.34965	5.09702	1.73255e-09	1.7094e-07	Up
BBA_09435	EJP61592	C6 zinc finger domain-containing protein	2.35459	5.1145	0.000370405	0.00717118	Up
BBA_09891	EJP61145	hypothetical protein BBA_09891	2.37798	5.19807	0.0195731	0.119233	Up
BBA_04339	EJP67046	hypothetical protein BBA_04339	2.39014	5.24208	5.79985e-05	0.00162602	Up
BBA_04934	EJP65963	hypothetical protein BBA_04934	2.39464	5.25845	0.0376409	0.181245	Up
BBA_00727	EJP69858	hypothetical protein BBA_00727	2.41336	5.32715	1.33715e-05	0.000495323	Up
BBA_04627	EJP66687	ACC deaminase	2.42572	5.37296	0.000156279	0.0035635	Up
BBA_09826	EJP61208	hypothetical protein BBA_09826	2.43756	5.41726	0.0222426	0.12953	Up
BBA_08528	EJP62444	hypothetical protein BBA_08528	2.45273	5.47453	0.0296948	0.156818	Up
BBA_02126	EJP69091	fumarylacetoacetate hydrolase	2.49124	5.62259	5.77915e-05	0.00162465	Up
BBA_05181	EJP65770	alpha/beta fold family hydrolase	2.50691	5.68403	2.21823e-30	1.75087e-27	Up
BBA_05854	EJP65084	putative phospholipase	2.50939	5.69378	1.39172e-13	2.97508e-11	Up
BBA_05179	EJP65768	nonribosomal siderophore peptide synthase SidC	2.528	5.76771	6.58834e-31	5.63358e-28	Up
BBA_09362	EJP61721	RTA-like protein	2.53114	5.78027	0.00248179	0.0293045	Up
BBA_03398	EJP67618	pyridoxal-dependent decarboxylase domain protein	2.54834	5.84962	1.21098e-10	1.55323e-08	Up
BBA_09935	EJP61130	hypothetical protein BBA_09935	2.57956	5.97756	0.00281434	0.0318166	Up
BBA_09454	EJP61611	hypothetical protein BBA_09454	2.61049	6.10712	0.0319497	0.163209	Up
BBA_09999	EJP61040	hypothetical protein BBA_09999	2.61075	6.1082	4.72718e-05	0.0013741	Up
BBA_10221	EJP60836	hypothetical protein BBA_10221	2.61276	6.11671	0.0247067	0.138836	Up
BBA_09436	EJP61593	zinc finger-like protein	2.61807	6.13927	1.38847e-06	7.38193e-05	Up
BBA_08801	EJP62259	beta-1,6-glucanase precursor	2.62332	6.16165	1.25598e-08	1.03933e-06	Up
BBA_08757	EJP62330	FAD binding domain-containing protein	2.62406	6.16481	0.00190094	0.0241405	Up
BBA_09332	EJP61691	hypothetical protein BBA_09332	2.62686	6.17681	0.0321434	0.163522	Up
BBA_09430	EJP61587	C2H2 finger domain protein, putative	2.62698	6.17731	0.0314348	0.162033	Up
BBA_10069	EJP60970	histone-lysine N-methyltransferase	2.63374	6.20633	0.00112571	0.0162689	Up
BBA_00908	EJP70039	RTA1 like protein	2.6365	6.21823	1.10572e-14	2.63856e-12	Up
BBA_09829	EJP61211	hypothetical protein BBA_09829	2.65418	6.2949	0.030362	0.158696	Up
BBA_07612	EJP63436	FAD binding domain-containing protein	2.65819	6.31239	2.2077e-24	1.19227e-21	Up
BBA_05404	EJP65535	hypothetical protein BBA_05404	2.6722	6.374	0.0489179	0.214415	Up
BBA_09213	EJP61876	hypothetical protein BBA_09213	2.69127	6.45882	3.15324e-06	0.000146405	Up
BBA_08246	EJP62859	peptide synthetase	2.70241	6.50889	1.16634e-09	1.19678e-07	Up
BBA_00728	EJP69859	zinc-binding dehydrogenase	2.71699	6.57499	2.66879e-10	3.29933e-08	Up
BBA_04647	EJP66154	H(+)-myo-inositol cotransporter	2.73135	6.64077	2.45862e-07	1.57674e-05	Up
BBA_02414	EJP68412	short chain dehydrogenase	2.73756	6.66943	4.41924e-17	1.41706e-14	Up
BBA_07335	EJP63691	Cytochrome P450 CYP655C1	2.74723	6.71427	0.0343082	0.170975	Up
BBA_04512	EJP66572	hypothetical protein BBA_04512	2.80557	6.99135	8.21907e-09	6.96991e-07	Up
BBA_09606	EJP61470	hypothetical protein BBA_09606	2.82678	7.09487	0.00176347	0.0227896	Up
BBA_09207	EJP61870	TPR repeat protein	2.82868	7.10423	0.00158726	0.0210969	Up
BBA_09683	EJP61387	hypothetical protein BBA_09683	2.82929	7.10725	0.0376406	0.181245	Up
BBA_09554	EJP61475	hypothetical protein BBA_09554	2.83477	7.13428	2.58907e-13	5.31329e-11	Up
BBA_02407	EJP68405	hypothetical protein BBA_02407	2.85912	7.25575	0.00148882	0.0199696	Up
BBA_00449	EJP70819	low affinity iron transporter	2.866	7.29039	0.000282308	0.00589344	Up
BBA_02942	EJP68046	LysM domain containing protein	2.90251	7.47725	0.0118058	0.0845348	Up
BBA_10115	EJP60928	endo alpha-1,4 polygalactosaminidase precursor	2.90883	7.51009	4.36556e-05	0.00128721	Up
BBA_09843	EJP61225	hypothetical protein BBA_09843	2.91122	7.52253	0.000231095	0.00503469	Up
BBA_05779	EJP65448	short chain dehydrogenase	2.91354	7.53467	2.00567e-06	0.000101882	Up
BBA_07809	EJP63209	protease S8 tripeptidyl peptidase I (cln2)	2.92033	7.57017	0.00173854	0.0225526	Up
BBA_08753	EJP62326	ErfK/YbiS/YcfS/YnhG family protein	2.95942	7.77809	7.48006e-21	3.33708e-18	Up
BBA_09833	EJP61215	hypothetical protein BBA_09833	2.97177	7.84496	3.98447e-05	0.00119197	Up
BBA_05353	EJP65484	class III chitinase ChiA2	2.98063	7.89333	0.0197451	0.11987	Up
BBA_08746	EJP62319	glutathione-S-transferase theta, GST	2.99159	7.9535	1.0077e-06	5.61958e-05	Up
BBA_08743	EJP62316	sarcosine oxidase	2.9998	7.9989	1.14601e-05	0.000440419	Up
BBA_10253	EJP60795	sexual development transcription factor NsdD	3.00014	8.00077	3.33055e-06	0.000153941	Up
BBA_03729	EJP67155	sterol desaturase/short chain dehydrogenase	3.02529	8.14145	0.00366376	0.0380505	Up
BBA_09936	EJP61131	hypothetical protein BBA_09936	3.03512	8.19712	9.62286e-09	8.02765e-07	Up
BBA_09933	EJP61128	hypothetical protein BBA_09933	3.16451	8.96627	4.20452e-12	7.19044e-10	Up
BBA_09790	EJP61254	Flavin-binding monooxygenase-like family protein	3.17283	9.01813	9.9071e-06	0.00038949	Up
BBA_07577	EJP63401	group II pyridoxal-5-phosphate decarboxylase	3.21678	9.29706	6.39788e-11	8.5258e-09	Up
BBA_08184	EJP62797	glutathione-s-transferase	3.22496	9.34999	0.00672217	0.0587031	Up
BBA_09687	EJP61342	hypothetical protein BBA_09687	3.25192	9.52632	0.00472637	0.0454094	Up
BBA_09295	EJP61733	glutathione-dependent formaldehyde-activating enzyme	3.25985	9.57884	2.92652e-49	4.28986e-46	Up
BBA_10076	EJP60977	CAMK family protein kinase	3.27921	9.70823	9.20363e-06	0.000373274	Up
BBA_09508	EJP61540	CAP domain-containing protein	3.29881	9.841	5.25739e-11	7.09817e-09	Up
BBA_09845	EJP61227	hypothetical protein BBA_09845	3.36101	10.2746	1.99255e-05	0.000683797	Up
BBA_00254	EJP70624	hypothetical protein BBA_00254	3.36137	10.2772	0.0194811	0.118915	Up
BBA_10078	EJP60979	hypothetical protein BBA_10078	3.36979	10.3373	0.0284967	0.153011	Up
BBA_09296	EJP61734	hypothetical protein BBA_09296	3.42242	10.7214	2.26038e-47	2.89922e-44	Up
BBA_06170	EJP64995	Cry3Aa protein	3.42334	10.7282	0.000265785	0.00563476	Up
BBA_09626	EJP61436	hypothetical protein BBA_09626	3.44102	10.8605	0.00211106	0.0259732	Up
BBA_06442	EJP64448	hypothetical protein BBA_06442	3.45645	10.9773	0.000619191	0.0105191	Up
BBA_09327	EJP61686	hypothetical protein BBA_09327	3.49474	11.2725	0.0347496	0.172504	Up
BBA_00691	EJP69822	hypothetical protein BBA_00691	3.52956	11.548	4.05215e-05	0.0012087	Up
BBA_10284	EJP60764	mitochondrial chaperone bcs1	3.55663	11.7666	1.61876e-12	2.96608e-10	Up
BBA_07337	EJP63693	Alcohol dehydrogenase	3.55688	11.7687	0.0135194	0.0929237	Up
BBA_08662	EJP62441	Cytochrome P450 CYP561D2P	3.56019	11.7957	0.0354368	0.174732	Up
BBA_06727	EJP64345	nonribosomal peptide synthase	3.64859	12.5411	0.000942859	0.0142781	Up
BBA_03635	EJP67061	IDI-2 precursor	3.65652	12.6102	5.5815e-12	9.38882e-10	Up
BBA_07031	EJP64026	MFS multidrug transporter	3.66793	12.7103	1.13486e-13	2.47762e-11	Up
BBA_05175	EJP65764	LCCL domain-containing protein	3.70475	13.0389	6.59042e-62	1.35249e-58	Up
BBA_09780	EJP61275	hypothetical protein BBA_09780	3.70876	13.0751	0.00130155	0.0180476	Up
BBA_10255	EJP60797	Methyltransferase type 11	3.70896	13.077	2.96097e-09	2.73716e-07	Up
BBA_03816	EJP67242	lectin-like protein	3.71392	13.1221	0.027252	0.148741	Up
BBA_05177	EJP65766	enoyl reductase	3.7431	13.3902	1.09311e-11	1.69946e-09	Up
BBA_07101	EJP64096	hypothetical protein BBA_07101	3.74888	13.4439	1.64756e-37	1.8784e-34	Up
BBA_08666	EJP62340	bacteriodes thetaiotaomicron symbiotic chitinase	3.76712	13.615	0.0135206	0.0929237	Up
BBA_09958	EJP61091	hypothetical protein BBA_09958	3.77498	13.6894	5.72008e-06	0.000249761	Up
BBA_02427	EJP68425	conidiation-specific protein (con-13)	3.78642	13.7983	1.09237e-17	3.61576e-15	Up
BBA_06826	EJP64122	glucose oxidase precursor	3.79268	13.8583	0.0112905	0.0816136	Up
BBA_09199	EJP61862	aminotransferase class-III	3.82959	14.2175	0.000197292	0.00436314	Up
BBA_09047	EJP61999	hypothetical protein BBA_09047	3.83149	14.2362	0.00138568	0.018958	Up
BBA_09297	EJP61735	hypothetical protein BBA_09297	3.84351	14.3553	7.11833e-34	6.6401e-31	Up
BBA_06346	EJP64777	oxaloacetate acetylhydrolase	3.84387	14.3589	4.28745e-25	2.7496e-22	Up
BBA_05173	EJP65762	Cytochrome P450 CYP52G6	3.87037	14.625	7.22301e-23	3.70576e-20	Up
BBA_07336	EJP63692	Cytochrome P450 CYP623C1	3.93568	15.3023	0.0169919	0.108292	Up
BBA_09609	EJP61419	hypothetical protein BBA_09609	3.9858	15.8433	0.00807328	0.0656938	Up
BBA_10254	EJP60796	hypothetical protein BBA_10254	4.00234	16.026	0.00018142	0.00409132	Up
BBA_03949	EJP67375	hydroxyacylglutathione hydrolase	4.01523	16.1698	1.45901e-05	0.00052346	Up
BBA_09844	EJP61226	vacuolar calcium ion transporter /H(+) exchanger	4.026	16.2909	1.70457e-06	8.96956e-05	Up
BBA_05174	EJP65763	hypothetical protein BBA_05174	4.05515	16.6235	1.10529e-71	2.83535e-68	Up
BBA_09416	EJP61644	methyltransferase domain protein	4.06137	16.6953	0.000745925	0.0121684	Up
BBA_04753	EJP66260	Concanavalin A-like lectin/glucanase	4.07437	16.8464	2.31206e-20	9.885e-18	Up
BBA_08989	EJP62065	short-chain dehydrogenase	4.07902	16.9008	1.33447e-06	7.13177e-05	Up
BBA_06299	EJP64730	peptidase M23B	4.10724	17.2347	6.72327e-07	3.79052e-05	Up
BBA_09835	EJP61217	hypothetical protein BBA_09835	4.12525	17.4511	0.000554374	0.00975717	Up
BBA_09604	EJP61468	synaptobrevin-like protein	4.13141	17.5258	1.43587e-05	0.000518785	Up
BBA_01324	EJP69359	hypothetical protein BBA_01324	4.14897	17.7404	0.0476774	0.211325	Up
BBA_09605	EJP61469	chitinase-like protein	4.19386	18.3011	7.8917e-06	0.000325208	Up
BBA_09628	EJP61438	C6 zinc finger domain-containing protein	4.22898	18.7521	1.20333e-11	1.84289e-09	Up
BBA_09437	EJP61594	C2H2 finger domain protein, putative	4.2441	18.9497	5.51035e-13	1.08734e-10	Up
BBA_09904	EJP61158	hypothetical protein BBA_09904	4.29354	19.6103	9.6958e-08	6.67709e-06	Up
BBA_02224	EJP69189	hypothetical protein BBA_02224	4.30186	19.7238	5.46333e-55	9.3432e-52	Up
BBA_10100	EJP60946	hypothetical protein BBA_10100	4.31188	19.8611	0.047203	0.209584	Up
BBA_10003	EJP61044	mitochondrial chaperone BCS1	4.39604	21.0542	5.93955e-14	1.35435e-11	Up
BBA_07074	EJP64069	methyltransferase domain-containing protein	4.46789	22.1294	1.80768e-29	1.3249e-26	Up
BBA_08260	EJP62873	hypothetical protein BBA_08260	4.52467	23.0177	7.2404e-10	8.16415e-08	Up
BBA_07851	EJP63251	hypothetical protein BBA_07851	4.53313	23.1531	0.00587569	0.0530259	Up
BBA_08974	EJP62050	antifungal protein	4.60479	24.3321	0.017649	0.111102	Up
BBA_05180	EJP65769	hypothetical protein BBA_05180	4.60682	24.3664	5.10502e-85	1.74609e-81	Up
BBA_09834	EJP61216	hypothetical protein BBA_09834	4.64432	25.008	9.32091e-06	0.000374137	Up
BBA_02701	EJP68699	Asp-hemolysin	4.68689	25.757	1.58948e-07	1.04549e-05	Up
BBA_04935	EJP65964	hypothetical protein BBA_04935	4.69148	25.839	0.0473995	0.210366	Up
BBA_09831	EJP61213	hypothetical protein BBA_09831	4.76132	27.1207	0.00582724	0.0527278	Up
BBA_07386	EJP63742	hypothetical protein BBA_07386	4.97606	31.4734	0.0445573	0.202123	Up
BBA_07787	EJP63187	cobalamin synthesis protein	5.00747	32.1662	1.91413e-06	9.86981e-05	Up
BBA_05157	EJP65746	hypothetical protein BBA_05157	5.02373	32.5306	0.00760058	0.063665	Up
BBA_08792	EJP62250	DUF300 domain protein, putative	5.13286	35.0869	7.31765e-97	3.75432e-93	Up
BBA_03419	EJP67639	hypothetical protein BBA_03419	5.23367	37.6263	0.0332533	0.167837	Up
BBA_03138	EJP68242	LysM domain-containing protein	5.24394	37.8951	0.0344526	0.171361	Up
BBA_08851	EJP62177	hypothetical protein BBA_08851	5.31313	39.7569	3.15698e-10	3.8564e-08	Up
BBA_09363	EJP61722	hypothetical protein BBA_09363	5.33832	40.4571	6.37324e-10	7.34784e-08	Up
BBA_07289	EJP63645	alpha/beta hydrolase, putative	5.38187	41.6968	1.66417e-25	1.1384e-22	Up
BBA_02700	EJP68698	hypothetical protein BBA_02700	5.39934	42.2048	3.35304e-08	2.54856e-06	Up
BBA_09645	EJP61402	hypothetical protein BBA_09645	5.53183	46.2643	0.00136713	0.0187541	Up
BBA_09857	EJP61199	alpha/beta hydrolase	5.66532	50.7495	2.33697e-09	2.17997e-07	Up
BBA_03917	EJP67343	hypothetical protein BBA_03917	5.84616	57.5265	8.01292e-15	1.95763e-12	Up
BBA_03191	EJP68295	argininosuccinate lyase	5.94942	61.7952	7.24682e-09	6.19663e-07	Up
BBA_04705	EJP66212	Cytochrome P450 CYP5293A1	6.06257	66.8366	0.0380043	0.182055	Up
BBA_07614	EJP63438	hypothetical protein BBA_07614	6.23675	75.4137	2.76884e-35	2.84111e-32	Up
BBA_07613	EJP63437	Cytochrome P450 CYP684A2	6.36563	82.4606	9.13323e-22	4.46267e-19	Up
BBA_07290	EJP63646	hypothetical protein BBA_07290	6.5831	95.8758	3.93594e-121	4.03867e-117	Up
BBA_09932	EJP61127	SCF E3 ubiquitin ligase complex F-box protein grrA	6.64751	100.253	9.56875e-25	5.77558e-22	Up
BBA_06726	EJP64344	Cytochrome P450 CYP625A1	6.78785	110.496	3.19503e-11	4.55336e-09	Up
BBA_08602	EJP62518	LysM domain-containing protein	6.81909	112.915	0.00438871	0.0430552	Up
BBA_07148	EJP63824	hypothetical protein BBA_07148	6.88936	118.551	0.0486735	0.213659	Up
BBA_03436	EJP67656	hypothetical protein BBA_03436	7.36316	164.639	0.0146554	0.098401	Up
BBA_09438	EJP61595	Methyltransferase type 11	7.73263	212.693	6.19074e-20	2.54093e-17	Up
BBA_09930	EJP61125	hypothetical protein BBA_09930	Inf	Inf	8.73654e-19	3.30111e-16	Up
BBA_04648	EJP66155	Cytochrome P450 CYP5280A1P	Inf	Inf	4.89611e-17	1.52239e-14	Up
BBA_02752	EJP67856	putative Heat-labile enterotoxin IIB, A chain	Inf	Inf	4.38121e-08	3.16588e-06	Up
BBA_06695	EJP64313	acid proteinase A	Inf	Inf	4.37579e-06	0.000195217	Up
BBA_01398	EJP69433	hypothetical protein BBA_01398	Inf	Inf	0.00354088	0.0371503	Up
BBA_08524	EJP62613	hypothetical protein BBA_08524	Inf	Inf	0.0372525	0.180181	Up

## Sheet: Table S3
Table S3. The RPKMs of the 775 DEGs in the heatmap of ΔBbElp3 versus WT.
Gene ID	ΔELP3_3	ΔELP3_1	ΔELP3_2	WT_1	WT_2	WT_3
	RPKMs	RPKMs	RPKMs	RPKMs	RPKMs	RPKMs
BBA_03085	-2.58373	-1.46852	-0.951493	-0.43611	0.422706	1.17645
BBA_02056	-2.51599	-0.63237	-1.76281	-0.0751839	0.378289	0.952097
BBA_09489	-2.46315	-0.469698	-0.895529	-0.588315	0.731702	1.16542
BBA_01130	-2.46	-0.910933	-1.3101	-0.0793013	-0.100274	0.629451
BBA_03660	-2.45056	-2.33822	-1.42232	-0.706121	-0.021297	0.646001
BBA_03458	-2.31695	-1.2169	-0.57824	0.792793	0.666762	0.265823
BBA_08493	-2.3118	-0.815183	-1.97828	0.658145	0.186828	0.328257
BBA_08897	-2.30857	-0.824365	-1.31683	0.715328	0.234488	0.482718
BBA_04963	-2.29491	-0.685789	-1.50994	0.210047	0.205467	0.458692
BBA_00196	-2.28144	-1.39485	-1.6539	1.85105	0.225791	0.184774
BBA_10067	-2.25177	-0.911492	-0.987929	0.643827	0.898805	1.43473
BBA_04256	-2.24406	-0.544388	-1.54174	0.938726	0.0555667	0.236515
BBA_05885	-2.2192	-1.37777	-2.18872	0.536271	0.699848	1.21032
BBA_03110	-2.20122	-2.10585	-0.949721	-1.13057	0.293101	0.373724
BBA_05835	-2.18086	-1.95069	-1.13414	-0.566914	0.427005	0.287493
BBA_00893	-2.15239	-1.68234	-1.47657	0.345362	0.712267	1.17323
BBA_01037	-2.14998	-0.0824726	-1.1862	0.793904	0.180949	0.12055
BBA_07542	-2.13917	-0.888874	-1.67113	0.353787	0.438976	0.550172
BBA_04502	-2.1209	-0.897391	-1.07505	-0.323827	0.672106	1.11305
BBA_06711	-2.09796	-1.80449	-1.52407	-0.0997814	0.744978	0.908853
BBA_03853	-2.08268	-1.43618	-0.959232	-0.0201772	0.630321	1.21967
BBA_03831	-2.07942	-1.41894	-0.873256	-0.594698	-0.0242354	0.891938
BBA_06573	-2.07927	-0.598874	-1.79483	0.871362	0.598504	0.391303
BBA_07462	-2.06338	-0.332388	-1.8533	1.9387	1.05449	1.18204
BBA_07949	-2.0345	-0.917995	-1.37205	-0.702166	0.00360231	0.158913
BBA_06574	-2.0335	-0.819443	-1.45182	0.59029	0.113284	0.322449
BBA_09708	-2.03192	-1.66651	-1.63904	0.923227	1.24648	0.441236
BBA_07302	-2.02744	-1.59231	-1.43376	0.644127	0.964878	1.0277
BBA_10326	-2.0097	-0.843613	-1.69117	1.00748	0.46403	0.862022
BBA_00655	-1.99953	-0.745988	-0.333085	0.0630985	1.37056	2.49838
BBA_08901	-1.99769	-1.36758	-1.39733	-0.867554	0.419039	-0.0807507
BBA_08626	-1.99001	-1.03307	-1.56896	0.00933859	0.137094	0.651973
BBA_01122	-1.9731	-0.744026	-1.15622	-0.549975	0.327935	0.981349
BBA_04450	-1.97119	-0.619914	-1.17697	0.115518	0.770495	1.00108
BBA_07022	-1.96243	-0.886095	-1.13821	-0.124497	0.367469	0.723892
BBA_03046	-1.95147	-1.52577	-0.875948	-0.441088	0.101788	0.725641
BBA_04441	-1.94959	-1.01662	-1.19502	-0.335909	0.3896	0.951865
BBA_03426	-1.93909	-0.544753	-1.17707	-0.0441438	0.263248	0.603486
BBA_09138	-1.93125	-0.530662	-1.25086	-0.16595	0.217919	0.488686
BBA_02804	-1.9239	-0.944584	-1.36203	0.0308355	0.42275	0.896037
BBA_01441	-1.92248	-0.861133	-1.17844	-0.0654646	0.406973	0.93739
BBA_05472	-1.91957	-0.980675	-1.44873	-0.177461	0.440618	0.930627
BBA_09498	-1.9135	-1.27581	-0.733363	0.651878	1.18046	1.66185
BBA_03899	-1.90881	-1.04436	-1.51001	-0.0755686	0.157559	0.623493
BBA_08936	-1.90711	-0.920501	-1.35728	-0.00640871	0.142925	0.712167
BBA_00122	-1.90128	-0.782581	-1.12056	-0.452883	0.522864	1.25068
BBA_03425	-1.89292	-1.02179	-1.68128	-0.457769	0.100565	0.596547
BBA_00628	-1.8884	-0.674115	-1.0458	0.526176	0.633718	0.904665
BBA_07886	-1.8829	-0.597236	-0.853777	1.09654	-0.329528	0.201864
BBA_07162	-1.88034	-0.773965	-1.09145	-0.247006	0.442308	0.89984
BBA_00164	-1.87462	-0.914211	-1.6567	-0.12969	0.124417	0.717688
BBA_07168	-1.87161	-0.751124	-1.32835	-0.0259915	0.53866	0.890392
BBA_05224	-1.86748	-1.66172	-1.539	-1.10142	0.242581	0.141559
BBA_03357	-1.86706	-1.21029	-1.41857	-0.396434	0.426403	0.458119
BBA_02616	-1.84932	-1.59934	-1.30544	-1.22083	0.886746	1.04948
BBA_07392	-1.84091	-0.85685	-1.26612	-0.244194	0.448283	0.906887
BBA_06602	-1.83722	-0.757182	-1.39823	-0.0476463	0.0997173	0.497677
BBA_07786	-1.83671	-1.84762	-1.05198	1.09787	-0.170955	-0.404642
BBA_09806	-1.83596	-0.37745	-1.14238	-0.517425	0.480539	0.725722
BBA_02988	-1.8358	-1.31583	-1.53074	-0.21785	0.54487	0.905532
BBA_00441	-1.8313	-0.71157	-1.44941	-0.228435	0.356383	0.689326
BBA_03241	-1.82826	-0.858589	-1.12668	-0.492951	0.549914	1.04047
BBA_03856	-1.8272	-1.1909	-1.59937	0.0277958	0.568374	1.06208
BBA_06743	-1.82635	-2.11361	-1.92923	0.202459	-0.102704	-0.106843
BBA_02667	-1.82226	-0.840227	-1.42525	-0.0467823	0.127952	0.671694
BBA_04908	-1.82116	-1.19475	-0.547341	-0.833139	0.359486	0.215058
BBA_05085	-1.82046	-0.487931	-1.09175	0.142739	0.456937	0.760816
BBA_02196	-1.81955	-1.38057	-1.34001	0.00367529	1.00675	1.74281
BBA_09735	-1.81772	-1.03657	-1.35182	-0.190208	0.437521	0.799215
BBA_03053	-1.81459	-1.50884	-1.4042	-0.974634	0.227221	0.537862
BBA_04743	-1.81341	-0.961434	-1.98038	-0.133864	1.13353	1.21329
BBA_04539	-1.79798	-0.796123	-1.14679	-0.373514	0.347199	0.807222
BBA_01079	-1.7956	-1.12064	-1.37875	-0.283669	0.398849	0.816652
BBA_01093	-1.79155	-1.16346	-1.24703	-0.781087	0.0410798	0.635188
BBA_00049	-1.78945	0.216014	0.352129	1.06715	0.823116	0.517965
BBA_05995	-1.78268	-0.950151	-1.28344	-0.380821	0.406428	0.861928
BBA_05132	-1.78065	-1.97676	-1.60429	0.0447069	0.166759	0.0689597
BBA_03356	-1.78039	-1.11255	-1.19035	-0.781176	0.481064	0.137844
BBA_08703	-1.77839	-0.260678	-0.964987	1.38527	0.237556	-0.0518375
BBA_01170	-1.77765	-1.08693	-1.53927	-0.386312	0.396998	0.851734
BBA_03093	-1.7762	-0.895599	-1.30985	-0.348085	0.376375	0.907143
BBA_00518	-1.76957	-0.746162	-0.940114	0.289296	0.605663	1.05956
BBA_06942	-1.76768	-0.303766	-0.781329	0.249942	0.256285	0.776475
BBA_06699	-1.76697	-1.52219	-1.78097	-0.559999	0.644499	1.08299
BBA_04348	-1.76009	-0.882158	-1.18265	-0.905873	-0.0804933	0.447929
BBA_01229	-1.75562	-0.854077	-1.1568	-0.20733	0.409789	0.788792
BBA_07218	-1.75396	-0.821553	-1.20429	-0.240248	0.253387	0.628041
BBA_06742	-1.74942	-1.77854	-1.33975	-0.252185	-0.0607741	-0.113675
BBA_00589	-1.72782	-1.24426	-1.39811	-0.722497	0.549863	0.437804
BBA_03057	-1.72643	-0.888184	-0.973164	-0.000341221	0.742043	1.62877
BBA_02421	-1.72014	-0.373071	-1.07464	0.245983	0.0627554	0.493241
BBA_09488	-1.71252	-1.32499	-1.32657	-0.708098	0.472811	0.994625
BBA_04721	-1.71017	-0.966127	-1.3866	-0.580463	0.00688097	0.347575
BBA_04568	-1.708	-1.01893	-1.0995	1.11345	0.640669	1.38505
BBA_06508	-1.70612	-0.61118	-1.07861	-0.238968	0.682167	1.13655
BBA_09802	-1.7012	-1.08731	-1.20698	-0.388807	0.433432	0.862824
BBA_02924	-1.69904	-0.717425	-1.27417	-0.25162	0.544812	1.02269
BBA_05120	-1.69652	-1.08137	-1.58073	0.537052	0.223796	0.72551
BBA_04031	-1.68134	-0.896371	-1.14648	-0.259254	0.213107	0.693935
BBA_04305	-1.67856	-0.860975	-1.38937	0.311274	0.114679	0.508641
BBA_03977	-1.6756	-0.843246	-1.01538	-0.222993	0.359261	0.872886
BBA_07130	-1.6677	-1.51707	-1.38241	0.104498	0.186788	0.0357146
BBA_08759	-1.66685	-0.917224	-1.35941	0.462183	0.698445	1.21379
BBA_09236	-1.66114	-1.16323	-1.38759	-0.379305	0.00454103	0.204309
BBA_03036	-1.65939	-0.819927	-1.32425	-0.50133	0.320957	0.665533
BBA_05497	-1.6574	-1.36518	-1.54796	-0.100255	0.380954	1.21193
BBA_06603	-1.65515	-1.20756	-1.48919	-1.2015	0.239096	0.255971
BBA_04174	-1.6529	-1.74865	-1.97248	0.707479	0.611148	1.27545
BBA_08580	-1.64954	-1.6642	-1.19864	0.258839	-0.635972	-0.0631965
BBA_04144	-1.64561	-0.713604	-1.26806	-0.171763	0.497853	1.10183
BBA_09480	-1.63967	-0.816063	-1.1298	-1.00527	0.774242	0.296224
BBA_05279	-1.63689	-1.17708	-1.52058	-0.561621	0.464028	0.969761
BBA_02743	-1.63284	-0.939079	-0.982034	-0.587445	0.149269	0.629125
BBA_05165	-1.63153	-1.111	-0.906161	-0.678055	0.166423	0.0748443
BBA_08997	-1.63147	-0.0986516	0.239005	0.786836	0.524022	0.153817
BBA_01925	-1.62922	-1.65032	-1.52668	-0.0325203	0.486711	1.02378
BBA_08114	-1.62756	-1.29251	-1.49367	-0.418755	0.282	0.822816
BBA_02812	-1.62229	-1.36049	-1.11559	0.206387	0.613132	1.02457
BBA_06115	-1.61819	-1.00917	-1.40943	0.0677173	0.529458	1.16577
BBA_01452	-1.6136	-1.09205	-1.26032	-0.247977	0.322598	0.814514
BBA_02191	-1.613	-1.2529	-1.42686	-0.439226	0.671543	1.71064
BBA_08584	-1.61268	-0.852366	-1.19068	-0.615327	0.4088	0.910877
BBA_08501	-1.61033	-1.30269	-1.54807	-0.315306	0.333379	0.710835
BBA_01131	-1.60811	-0.796229	-1.13229	-0.364324	0.34456	0.602977
BBA_05163	-1.60757	-1.18535	-1.14616	-0.221904	0.817783	1.43561
BBA_03457	-1.60399	-0.997818	-0.734113	0.528021	0.80081	0.540248
BBA_05652	-1.60343	-1.39667	-1.36308	-1.01337	0.209079	0.116778
BBA_07911	-1.60067	-0.712773	-1.18888	-0.0361389	0.250105	0.550653
BBA_06136	-1.59689	-0.467439	-1.12299	0.0383579	-0.11898	0.139277
BBA_04794	-1.59371	-1.55088	-1.41643	-0.88353	0.321241	0.0745118
BBA_06710	-1.59227	-1.28549	-1.33774	-0.223871	0.647873	0.983313
BBA_06302	-1.59011	-0.807907	-1.40705	0.142543	0.163319	0.343459
BBA_04501	-1.58978	-1.018	-1.57381	-0.202708	0.543818	1.42763
BBA_07281	-1.58913	0.166259	0.115258	1.34063	1.08117	1.04034
BBA_07524	-1.58787	-0.692347	-1.07255	-0.286547	0.443954	0.934598
BBA_09281	-1.58761	-0.987269	-1.1883	-0.495891	0.471594	1.01339
BBA_01976	-1.58199	-1.03163	-1.34769	-0.654976	0.139098	0.958418
BBA_06556	-1.5817	-0.940071	-1.12355	-0.433821	0.447291	0.872024
BBA_09289	-1.57557	-1.3433	-1.41493	-0.018093	-0.166007	-0.505632
BBA_05049	-1.57484	-0.858932	-1.70494	0.431504	0.0523512	0.345041
BBA_00968	-1.57178	-1.29132	-1.66099	-0.150152	0.98228	0.895167
BBA_06830	-1.56795	-0.864687	-1.42192	-0.604788	0.0226483	0.432553
BBA_05866	-1.56721	-1.10511	-1.22014	-0.309824	0.375355	0.811647
BBA_03469	-1.56354	-0.981635	-1.2035	-0.780211	-0.143955	0.313787
BBA_04003	-1.56062	-0.857805	-1.23224	-0.0636723	0.362284	0.793632
BBA_08411	-1.55847	-1.13333	-1.29019	-0.452669	0.420217	0.899101
BBA_03118	-1.55621	-1.07823	-1.02449	0.762772	-0.140392	-0.0108654
BBA_05837	-1.55552	-0.701824	-0.939459	-0.240021	0.0739755	0.365274
BBA_02491	-1.54518	-0.929416	-0.670435	-0.0132191	-0.368408	1.00621
BBA_03966	-1.54042	-1.1318	-0.59059	-0.486406	0.117195	-0.0764419
BBA_08812	-1.53163	-2.25504	-0.956074	-0.708066	-0.347655	0.384537
BBA_07053	-1.53046	-0.519441	-1.07946	1.19997	1.23373	0.862265
BBA_07724	-1.52406	-0.593367	-0.824384	-0.231892	0.44055	1.068
BBA_02522	-1.52231	-0.744496	-1.2114	-0.172484	0.527357	1.07783
BBA_06601	-1.51795	-0.870716	-1.46155	-0.288766	0.0565685	0.527396
BBA_03659	-1.51075	-1.2099	-1.31697	-0.52223	0.349541	0.795309
BBA_10036	-1.50249	-0.891395	-0.999818	-0.141063	0.230887	0.661728
BBA_05973	-1.49535	-1.12987	-1.22971	-0.113945	0.507351	1.47928
BBA_05884	-1.49331	-1.07668	-1.40408	-0.297318	0.153599	0.614085
BBA_08502	-1.4927	-1.99946	-2.37409	1.82238	1.4348	1.24966
BBA_05949	-1.48987	-0.713477	-1.23018	-0.170345	0.437515	1.03683
BBA_04354	-1.48409	-0.734462	-1.00515	0.0885819	0.60755	1.18001
BBA_03301	-1.48085	-0.912165	-1.13776	-0.590262	0.104983	0.660079
BBA_00462	-1.47848	-1.031	-1.20488	1.12468	0.39265	0.289958
BBA_04328	-1.4753	-0.39656	-1.0617	0.117406	0.0934373	0.272391
BBA_09052	-1.47237	-1.45791	-1.1301	0.8175	0.975017	1.11481
BBA_08526	-1.46902	-1.45417	-2.0136	-0.49198	0.0789842	1.74189
BBA_06604	-1.46712	-1.23934	-1.44012	-0.895746	0.167328	0.0994877
BBA_00752	-1.46622	-0.817382	-0.725195	-0.40331	0.154388	1.09681
BBA_00420	-1.43907	-0.83503	-1.51599	1.45374	0.635763	0.279189
BBA_04064	-1.43907	-0.429385	-0.18705	0.659474	0.656559	0.403497
BBA_03921	-1.43865	-0.798709	-0.855265	-0.620195	0.328674	0.771836
BBA_06740	-1.43125	-1.77818	-1.21977	0.132383	-0.107293	-0.533806
BBA_03862	-1.43043	-0.830372	-1.1099	-0.341925	0.129987	0.838126
BBA_07940	-1.42898	-0.992299	-1.50166	-0.441326	0.459758	1.08034
BBA_10168	-1.42871	-1.11464	-1.29902	0.0542298	-0.267614	-0.196587
BBA_03368	-1.42799	-1.19747	-0.818736	-0.0744903	0.809931	1.12073
BBA_01117	-1.41664	-1.34623	-1.33911	-1.06603	0.315114	0.801683
BBA_02892	-1.41271	-0.203078	-0.157072	-0.0354431	0.961217	0.832336
BBA_05141	-1.40768	-0.757915	-1.20009	-0.942573	0.538664	0.6647
BBA_00108	-1.40536	-0.472887	-0.856988	0.0374232	0.640794	1.1595
BBA_02032	-1.40219	-1.06936	-1.29037	-0.502611	0.344959	0.555834
BBA_09116	-1.39899	0.275483	0.277824	0.105455	1.87506	1.84581
BBA_08476	-1.39302	-0.67449	-1.04251	1.13796	0.818134	0.685323
BBA_06693	-1.38803	-1.41618	-0.748748	0.0757695	1.19088	2.33963
BBA_07407	-1.38694	-1.10773	-1.18604	-1.08738	0.0386825	-0.258984
BBA_02944	-1.38552	-1.2293	-0.35601	-0.504071	0.902121	1.03401
BBA_07393	-1.3815	-0.77674	-1.22856	-0.55976	0.184409	0.739048
BBA_08984	-1.37983	-0.348757	-0.814669	0.281232	0.548409	1.18758
BBA_04912	-1.37681	-1.40632	-1.38635	1.02094	0.82428	0.78947
BBA_08642	-1.37514	-1.03824	-1.29946	-0.594203	0.0715924	0.567287
BBA_04101	-1.37442	-0.464242	-0.86242	0.414215	0.850379	1.27216
BBA_10105	-1.37069	0.169428	-0.648118	0.727389	1.23619	1.57131
BBA_00916	-1.36944	-1.17416	-0.00973885	-0.447217	1.43308	1.02415
BBA_07176	-1.36875	-0.940476	-1.52602	-1.07342	0.0621617	0.192223
BBA_03054	-1.36645	-0.552304	-0.483935	0.160061	0.514227	1.38548
BBA_05233	-1.36372	-0.299965	-0.279669	-0.160247	0.571202	1.11779
BBA_08359	-1.36023	-1.24329	-1.50283	-0.463657	0.144205	0.73636
BBA_06250	-1.35023	-2.03072	-1.64136	1.02516	0.857484	0.791299
BBA_02027	-1.33575	-0.548148	-0.910643	0.0312111	0.595893	1.28163
BBA_04723	-1.33025	-0.914819	-1.23189	-0.582984	0.0176231	0.493669
BBA_02325	-1.32758	-1.00126	-0.484253	-0.245952	0.568992	1.12756
BBA_05964	-1.32176	-0.448684	-1.01742	-0.0627804	0.367494	0.84697
BBA_08630	-1.31883	-1.61679	-1.34107	0.42134	0.32068	0.000700845
BBA_08027	-1.29957	-1.49041	-1.63127	-0.97478	0.515327	1.31938
BBA_00733	-1.29954	-1.58643	-1.53348	-0.731658	0.488193	0.890345
BBA_06588	-1.29636	-1.20971	-1.14804	-1.37812	0.915822	0.671036
BBA_04565	-1.29491	-1.05888	-1.42336	0.883954	0.508251	0.779097
BBA_03048	-1.29042	-0.856915	-1.05189	-0.449337	0.637216	1.23177
BBA_04933	-1.2897	-0.885303	-1.47154	-0.566378	0.407457	1.15016
BBA_03570	-1.28765	-1.84437	-0.618133	1.45462	0.0901815	0.250596
BBA_04932	-1.28695	-1.33426	-1.26295	-0.943904	1.02857	0.814156
BBA_04724	-1.27796	-1.23823	-1.34064	-0.634207	0.447951	1.07105
BBA_01527	-1.27786	-1.58494	-1.86554	0.0865509	0.896702	1.42484
BBA_06732	-1.25561	-1.0271	-1.09231	-0.294458	0.308303	0.762759
BBA_05728	-1.25319	-0.934741	-1.10598	-0.836899	-0.172676	-0.302166
BBA_02326	-1.25143	-1.52783	-1.39292	0.91664	1.41277	2.07239
BBA_04835	-1.24935	-1.22999	-1.2717	-0.585412	0.661068	0.958941
BBA_03047	-1.24532	-0.873773	-0.962596	-0.124926	0.546891	1.128
BBA_01883	-1.24513	-0.2627	-1.034	-0.0674804	0.57061	1.08248
BBA_09519	-1.23949	-1.78361	-0.639791	-0.450212	0.288492	0.822221
BBA_03634	-1.23841	-1.12709	-1.38875	-0.126098	0.140586	0.297337
BBA_03620	-1.22216	-1.32717	-1.5486	-0.355291	0.551871	1.34997
BBA_04415	-1.22015	-1.19411	-0.982339	-0.901232	0.746528	0.872928
BBA_09428	-1.21386	-1.29297	-1.09934	0.0480193	0.909836	0.341005
BBA_09663	-1.21198	-0.29053	-0.700287	0.493714	0.301558	0.811086
BBA_05739	-1.20961	-0.040029	-0.0088456	0.884791	0.589511	0.231434
BBA_02987	-1.20834	-0.684486	-0.98071	0.122977	0.665631	1.46373
BBA_03454	-1.19495	-0.955624	-1.32337	-0.131746	0.300729	0.958785
BBA_03683	-1.19294	-0.736838	-1.11523	0.242488	0.313496	-0.3906
BBA_00405	-1.18965	-0.895599	-0.951271	-0.872297	-0.154582	-0.100908
BBA_04559	-1.18934	-0.805452	-0.781852	0.205418	-0.00759328	-0.27309
BBA_08500	-1.17913	-1.33282	-1.45271	-0.527918	-0.249794	-0.0345468
BBA_07776	-1.17827	-2.26523	-1.2473	-0.752781	0.494739	0.58306
BBA_03808	-1.17563	-0.798439	-0.657588	-0.718812	0.394975	0.216606
BBA_07634	-1.1754	-2.8181	-0.636079	0.241708	0.638881	0.778766
BBA_02034	-1.16867	-2.12687	-1.20763	0.0210029	1.0865	0.151531
BBA_08581	-1.16294	-0.947156	-1.0927	-0.894827	-0.171136	-0.19816
BBA_09267	-1.16001	-1.04597	-1.22555	0.0191478	0.67681	0.99431
BBA_04940	-1.15906	-0.646787	-1.17118	-0.384843	-0.0289194	-0.206182
BBA_08061	-1.15708	-0.901085	-1.27106	-0.396195	-0.130712	-0.147808
BBA_06795	-1.1555	-2.45128	-0.756961	-0.73823	0.86588	0.887168
BBA_02858	-1.14838	-0.750796	-0.472274	-0.189076	0.624796	1.16305
BBA_03290	-1.14397	-1.08458	-1.24849	-1.05987	-0.228011	-0.0490661
BBA_02405	-1.143	-1.02119	-0.570186	-0.00111679	0.84891	1.26495
BBA_09119	-1.13761	-0.735632	-0.551268	0.193551	1.17815	1.1116
BBA_07117	-1.1246	-1.52738	-1.17332	-0.347817	0.46826	0.0847428
BBA_03472	-1.12193	-1.29755	-1.39126	0.0473641	-0.404595	-0.35319
BBA_00528	-1.115	-1.10789	-1.48837	-0.216492	0.156135	0.890512
BBA_02577	-1.11451	-1.18139	-1.13599	-0.136756	1.01617	0.343716
BBA_03965	-1.11426	-0.856229	-0.695868	-0.223125	0.0778282	-0.276036
BBA_01214	-1.10216	-1.59428	-1.37906	-0.555023	0.583675	1.13924
BBA_02186	-1.09981	-1.11539	-1.04895	-0.790608	-0.401469	-0.303736
BBA_00384	-1.09454	-0.967111	-1.59455	0.266886	0.396459	0.701667
BBA_05184	-1.09099	-1.22767	-1.13671	-0.783999	-0.253178	0.100667
BBA_06565	-1.09031	-0.771154	-0.860862	0.380165	0.397172	-0.536843
BBA_09303	-1.07536	-1.13644	-0.574357	-0.680707	0.0744917	-0.122117
BBA_09569	-1.05248	-1.30242	-1.11533	0.176205	0.0732338	-0.433411
BBA_00056	-1.0474	-1.20127	-1.17302	-0.762676	0.617997	0.182445
BBA_07460	-1.04215	-1.91648	-2.40356	1.27561	0.646341	0.232019
BBA_06333	-1.03408	-0.839864	-0.658941	0.846592	0.934015	1.03003
BBA_03477	-1.02236	-1.25391	-0.672076	-0.578432	1.13756	0.239237
BBA_03984	-1.01775	-1.85691	-1.965	0.607369	0.439657	0.131315
BBA_07771	-1.00983	-0.13894	-0.322111	-0.105775	0.784047	0.921517
BBA_05433	-1.00409	-1.1114	-0.820288	-0.419784	0.463843	1.42782
BBA_07772	-0.991451	-0.34684	-0.692048	0.224532	0.937811	1.01849
BBA_10301	-0.987935	-1.13963	-0.935488	-0.666858	0.00128856	0.303402
BBA_05793	-0.982602	-0.715063	-1.19814	-0.18398	0.89047	1.13886
BBA_06566	-0.977026	-0.881181	-0.980415	0.266951	-0.0575312	-0.649327
BBA_00626	-0.976729	-0.355096	-0.501011	0.622335	0.705226	0.837862
BBA_06273	-0.975909	-1.59276	-1.1763	0.660039	-0.401066	-0.308575
BBA_09523	-0.974556	-0.974556	-0.974556	0.94892	1.65635	-0.162057
BBA_07933	-0.974215	-1.00104	-2.14189	-0.200128	0.0313376	0.242835
BBA_01381	-0.971683	-1.75331	-0.740217	0.0273044	0.493786	1.46532
BBA_03071	-0.967366	-0.988044	-1.51853	-0.21152	-0.231609	-0.3217
BBA_04635	-0.960601	-1.27579	-1.08014	-0.551884	1.23973	0.724193
BBA_07782	-0.940029	-0.845374	-1.15371	0.643684	0.161096	-0.338019
BBA_00100	-0.935558	-0.773051	-0.849798	0.0051412	0.956346	1.63571
BBA_01667	-0.932526	-1.32196	-0.724175	-0.656891	0.0230094	0.189096
BBA_04552	-0.913246	-0.832698	-0.882307	-0.403444	1.47128	0.941517
BBA_01528	-0.906198	-1.59202	-1.86999	0.0341194	0.414952	1.05451
BBA_06706	-0.905496	-1.72351	-0.712484	-0.676794	1.48207	1.24222
BBA_03471	-0.900377	-1.01718	-0.959411	-0.46758	-0.740812	-0.468949
BBA_09565	-0.890336	-1.54942	-1.67138	0.382843	0.111909	0.128575
BBA_03494	-0.884898	-0.600594	-1.1114	-0.584383	0.3233	0.826149
BBA_08060	-0.869566	-1.33002	-1.16904	-0.28233	-0.135499	-0.4262
BBA_02003	-0.861438	-0.470036	-0.400688	0.30106	0.298154	0.29709
BBA_04783	-0.853871	-1.05208	-0.845422	0.0947406	-0.44395	-0.712336
BBA_06999	-0.849623	-1.30726	-0.622557	0.420322	1.13679	0.774103
BBA_04585	-0.836831	-0.785055	-0.877929	-0.0402367	0.0539631	-0.144731
BBA_06024	-0.829747	-2.13394	-1.40792	0.340737	-0.314519	0.119789
BBA_02396	-0.807202	-0.783924	-1.08077	0.561494	0.23115	0.172769
BBA_07118	-0.795374	-1.19725	-0.866084	-0.14825	0.362659	0.479815
BBA_07783	-0.786907	-1.08493	-0.854896	0.880153	0.270773	-0.523989
BBA_03213	-0.759205	-0.377037	0.080599	0.260208	0.631229	0.106348
BBA_06221	-0.758809	-0.513034	-1.11027	1.05172	0.75415	1.07274
BBA_03123	-0.753175	-1.62926	-1.12885	0.349587	1.07867	2.48827
BBA_10258	-0.750527	-0.757016	-0.752626	-0.543207	-0.214741	-0.163603
BBA_07328	-0.736723	-0.786159	-1.19815	0.321391	0.582604	0.915641
BBA_01983	-0.731388	-1.88429	-1.64064	1.01283	1.16847	1.19359
BBA_04241	-0.715152	-1.2789	-0.772062	-0.65336	0.647277	0.964582
BBA_07291	-0.714186	-0.284697	-0.359272	0.385812	1.45283	0.917301
BBA_07869	-0.702303	0.723655	1.11901	-1.24635	-0.43477	-0.912307
BBA_04827	-0.697478	-0.921884	-1.30751	1.08559	0.986117	0.883037
BBA_03821	-0.68832	-1.11711	-0.340438	2.74281	0.514815	0.711705
BBA_00522	-0.679984	-1.62878	-1.5701	1.62505	0.706326	1.03779
BBA_04029	-0.677986	-0.76003	-0.883332	-0.153971	0.360268	0.767488
BBA_02932	-0.666705	-1.09042	-0.570331	-0.321755	-0.0960274	-0.0268408
BBA_02002	-0.66623	-0.553856	-0.536254	0.543809	0.110905	0.151213
BBA_00878	-0.652439	-1.32001	-1.31	0.864135	0.839253	1.67094
BBA_06568	-0.647989	-0.652104	-0.847067	1.34776	1.01764	-0.0658239
BBA_07327	-0.608656	-1.33255	-1.3428	1.45508	0.54607	0.438899
BBA_05879	-0.602719	-1.08623	-0.173107	0.130852	1.99522	0.979383
BBA_05823	-0.600547	0.110244	0.278906	-0.985304	-0.572712	-0.586508
BBA_00319	-0.5983	-0.714016	-0.244316	0.277911	0.585865	0.0266742
BBA_09207	-0.59166	-0.146652	-0.0586782	-0.896857	-0.80186	-0.760172
BBA_00513	-0.572917	-1.30551	-0.890569	-0.200034	0.74028	0.275799
BBA_09454	-0.572734	-0.298017	-0.0924751	-0.845666	-0.771436	-0.773805
BBA_09690	-0.551044	-0.94924	-0.561906	1.85086	0.718349	0.954653
BBA_07294	-0.51485	-0.952449	-0.608864	0.490757	0.373171	-0.261119
BBA_01397	-0.508759	-0.426308	-0.0515528	-0.948033	-0.659838	-0.883704
BBA_04824	-0.488284	-0.397432	-0.683406	0.92329	0.760602	0.593069
BBA_09176	-0.448858	-1.10526	-0.833869	0.307324	0.697932	0.213929
BBA_06709	-0.430104	-0.00960382	-1.15691	0.689943	1.00293	0.780649
BBA_03795	-0.423415	-0.600426	-1.62509	-0.57261	0.528824	0.905425
BBA_08180	-0.413747	-0.206776	-0.508922	0.365044	0.321377	0.375135
BBA_04997	-0.401652	-0.265767	-0.349457	0.869295	0.87778	0.74906
BBA_03822	-0.399133	-0.827525	-1.07401	1.60021	0.884849	1.6126
BBA_01901	-0.389087	-0.819556	-0.895831	1.48524	0.748491	0.257441
BBA_08390	-0.3709	-1.04007	-1.33275	1.3354	1.07345	0.6725
BBA_01678	-0.370547	-0.0992392	-0.243996	1.08922	0.941893	1.38331
BBA_09843	-0.365809	-0.161796	0.029216	-1.06046	-0.754646	-0.925767
BBA_09455	-0.336605	-0.0404388	-0.000280016	-1.00541	-0.997823	-0.795464
BBA_06442	-0.32596	0.561291	0.426686	-1.24169	-0.720747	-0.792729
BBA_09826	-0.322394	-0.369113	-0.00305519	-0.978283	-0.702907	-0.878986
BBA_09837	-0.314555	-0.356065	0.00623874	-0.734202	-0.637385	-0.784102
BBA_04175	-0.312718	-1.14219	-1.23702	1.80367	1.21981	1.45426
BBA_04826	-0.304045	-0.134657	-0.850837	1.02673	0.863425	0.756436
BBA_09606	-0.29432	-0.254138	-0.137627	-0.867337	-0.77502	-0.734317
BBA_03973	-0.262868	-0.237117	0.0792044	-0.973172	-0.377099	-1.02473
BBA_04384	-0.247837	0.423287	0.987047	-0.983192	-0.713129	-0.0658979
BBA_10069	-0.225889	-0.416364	-0.064784	-0.818419	-0.745618	-0.713941
BBA_00445	-0.221205	0.840957	1.68897	-0.962435	-1.28061	-0.629259
BBA_09950	-0.192576	1.06912	0.396163	-1.31998	-0.550599	-0.873726
BBA_07611	-0.17105	0.0642652	0.777298	-0.67209	-0.503664	-0.481985
BBA_00212	-0.151854	-0.942553	-0.616275	1.23476	0.831561	1.28524
BBA_09555	-0.114533	-0.874594	-0.972238	1.24655	0.867496	0.67177
BBA_05366	-0.0986059	-0.548046	-0.114383	-1.49802	-0.576029	-0.907552
BBA_01687	-0.097351	0.286396	0.235692	0.442577	1.76703	2.39081
BBA_02719	-0.0885738	-1.06825	-0.950064	-0.137607	0.89703	1.50279
BBA_09208	-0.0831863	-0.219341	-0.0232311	-1.16838	-0.793834	-0.918222
BBA_06421	-0.0634804	-1.18387	-0.845002	1.61053	1.37203	1.26703
BBA_06708	-0.0630072	0.441853	-0.597853	0.870377	1.04153	0.825961
BBA_03338	-0.0600857	-0.0293049	0.345531	-1.47596	-0.178982	-0.537206
BBA_09211	-0.0348353	-0.192349	0.368191	-0.88871	-0.798722	-0.889735
BBA_00572	-0.0271765	1.39748	1.23112	-0.749795	-0.0120215	-0.0585164
BBA_09829	0.00355236	-0.273048	-0.455885	-0.85598	-0.507693	-0.85598
BBA_08183	0.00936489	1.07141	0.478655	0.00622879	-0.777074	-1.01139
BBA_03852	0.0261991	-0.0247442	0.0636863	-1.36643	-0.0503918	-0.546653
BBA_02933	0.0334944	0.412121	0.89285	-1.3922	-0.262087	-1.22145
BBA_01103	0.0605143	1.02103	0.931387	-0.5198	-1.09932	-0.351746
BBA_09213	0.0916643	-0.185323	0.00859205	-0.945877	-0.718667	-0.752289
BBA_09831	0.109983	-0.218056	0.0867609	-1.12217	-1.12217	-0.937077
BBA_06684	0.110282	1.39098	1.54667	-1.01121	-0.355592	-0.243634
BBA_01398	0.110896	0.522791	0.351807	-0.882856	-0.882856	-0.882856
BBA_00093	0.123333	1.57984	1.63255	-1.68524	0.301265	0.243528
BBA_07936	0.127127	-0.755503	-1.58218	1.82284	0.548907	0.273002
BBA_09626	0.138637	-0.371165	-0.145558	-0.808442	-0.701168	-0.80878
BBA_09604	0.138944	0.0378377	0.274367	-0.938051	-0.857417	-0.938289
BBA_01494	0.178553	1.11677	2.27817	-1.20027	-0.432993	-0.267742
BBA_09627	0.196328	-0.000681002	0.224152	-0.564154	-0.561324	-0.377528
BBA_06443	0.207778	0.859371	0.602096	-0.884359	-1.0792	-1.09009
BBA_10010	0.211183	0.209236	0.449019	-0.655615	-0.3248	-0.884133
BBA_08184	0.214707	1.04192	0.609316	-0.0243626	-0.736732	-1.45268
BBA_03832	0.215882	0.523393	0.167061	0.0281149	0.0184698	-0.780331
BBA_09430	0.228509	0.281382	1.61994	-0.557689	-1.19631	-0.7647
BBA_09955	0.228622	1.43057	1.51958	-0.399333	0.029743	0.181667
BBA_06921	0.255809	-0.410446	-0.200403	0.83906	0.608347	0.335163
BBA_03729	0.261841	1.02402	-0.0982803	-0.776677	-0.703465	-0.70805
BBA_01656	0.263191	2.04272	2.18799	-1.33552	-0.223349	-0.306018
BBA_06532	0.288343	0.139376	0.630338	-0.03364	-0.815768	-1.30612
BBA_04971	0.290719	0.78451	0.946338	-1.24582	-0.191448	-0.326684
BBA_00047	0.292994	-0.11746	1.49121	-2.00041	-0.928555	-0.625161
BBA_05833	0.300609	-0.00643069	1.16176	0.0192689	-0.645322	-1.08122
BBA_09838	0.307072	-0.588677	0.128986	-1.21689	-0.619764	-0.950869
BBA_09845	0.344833	-0.210306	0.071006	-0.904516	-0.687685	-0.735199
BBA_05089	0.358663	1.67476	1.76349	0.215433	-0.0205429	-0.0345688
BBA_05096	0.362146	1.1022	1.04264	-0.401465	-0.0780994	-0.897309
BBA_02602	0.371713	-0.267358	-0.145751	-0.540439	-0.737493	-0.890161
BBA_06116	0.396687	0.671998	0.878014	-0.402881	-1.53245	-1.65057
BBA_04700	0.410629	0.0314184	0.210488	-1.13775	-0.461234	-1.41166
BBA_00800	0.420083	0.801586	1.21761	-0.967583	-1.32421	-0.83284
BBA_00284	0.422155	0.490528	-0.218595	-1.07671	-0.586652	-0.824589
BBA_07636	0.423448	-0.194576	0.575695	-0.0065769	-0.489949	-0.881215
BBA_02762	0.434041	-0.360039	0.211654	-0.979084	-1.4898	-1.20225
BBA_09833	0.435697	-0.253928	0.100176	-1.13117	-0.83504	-1.13174
BBA_03160	0.446493	0.599395	1.32695	-1.27296	-0.66967	-0.835417
BBA_02759	0.45611	0.215092	0.530656	-0.8888	-0.754501	-0.930294
BBA_01679	0.458092	1.60015	2.11535	-0.328093	0.0353928	-0.695506
BBA_09844	0.460247	-0.234825	0.430785	-1.43615	-1.08178	-1.22046
BBA_01748	0.476926	0.790403	0.927706	0.455175	-0.238692	-0.676793
BBA_02457	0.487628	0.619972	0.249972	-0.0932053	-0.40664	-1.07092
BBA_09216	0.495468	-0.0945499	0.194159	-0.84883	-0.819031	-1.07565
BBA_03664	0.50035	-0.435228	0.158573	-0.34917	-0.87817	-1.40911
BBA_05404	0.522864	2.83055	0.481544	-0.0957783	-0.7396	-1.09373
BBA_02126	0.534614	0.937919	1.49031	-1.63391	-0.513241	-0.511991
BBA_10076	0.540574	-0.128796	0.331961	-1.22199	-0.899208	-0.956001
BBA_00792	0.541201	0.348416	0.210777	-0.289752	0.0637197	-0.698805
BBA_09256	0.550777	1.48077	2.56246	-0.736525	0.150313	-0.843334
BBA_01814	0.550893	0.796036	0.473183	0.382241	-0.151045	-1.24535
BBA_08528	0.563865	0.233872	1.42133	-1.3682	-0.305529	-0.270253
BBA_02118	0.576333	0.388711	0.342804	-0.498564	-0.136325	-1.21539
BBA_04027	0.579849	0.541991	0.405897	-0.635505	-0.533803	-1.06844
BBA_02896	0.591611	0.641675	0.661904	-0.425742	-0.477801	-0.429743
BBA_05353	0.605281	0.541648	1.767	-0.736761	-0.346747	-0.188355
BBA_09199	0.606217	-0.0382308	0.260785	-0.992503	-0.989327	-1.23602
BBA_07988	0.608471	0.0978614	0.362423	-0.774539	0.135467	-0.905601
BBA_09605	0.608915	0.497569	0.220838	-1.05819	-0.816937	-0.820563
BBA_08628	0.610421	0.139906	-0.0691965	-0.710065	-0.209088	-0.759845
BBA_08176	0.616745	-0.419344	1.76708	-0.780792	-0.496318	-0.840587
BBA_05551	0.620418	0.484529	0.823855	-0.278189	-0.267007	-0.778406
BBA_08218	0.626087	0.574345	0.799917	-1.12589	-1.00253	-0.98088
BBA_08524	0.635654	0.043291	-0.24686	-0.330338	-0.330338	-0.330338
BBA_06744	0.644421	0.969688	1.10142	-0.233931	-0.156429	-1.32659
BBA_02195	0.645409	1.74413	1.00818	0.0546234	-0.471495	-0.00619797
BBA_03476	0.651803	0.762998	-0.293945	-0.843056	-1.33052	-1.16658
BBA_09362	0.669348	0.145358	1.55728	-1.19202	-0.267461	-0.92929
BBA_03078	0.671032	1.36537	1.24517	0.614523	-0.310504	-1.27002
BBA_03813	0.68339	0.284293	0.153648	-0.190899	-0.266122	-0.837016
BBA_08685	0.686814	1.47356	0.882334	0.127874	-0.575335	-0.591411
BBA_09959	0.693951	2.7693	3.12236	-0.367311	-0.574482	-0.396805
BBA_08523	0.697553	1.62734	0.755678	-0.747364	-0.39202	-0.698798
BBA_09856	0.710124	1.76772	0.673218	-1.36059	-1.6272	-1.3656
BBA_00967	0.710536	1.07053	0.462838	-0.886749	0.0586114	-0.761567
BBA_09628	0.717185	0.314391	0.725201	-0.691756	-0.688655	-0.710431
BBA_04268	0.718079	0.194464	2.36316	-1.03551	-1.16685	-0.895916
BBA_09416	0.726381	2.62628	3.29148	-0.597347	-0.593169	-0.232876
BBA_05882	0.726962	0.510677	0.296055	0.0501395	-0.227194	-0.83355
BBA_09835	0.732829	-0.220668	0.235643	-1.1637	-0.915184	-1.10994
BBA_05855	0.769749	1.54035	1.76068	-1.4741	-1.06953	-0.847215
BBA_02815	0.774642	0.321096	0.540492	-0.162967	-0.550723	-0.563301
BBA_05856	0.780056	1.67704	1.59856	-0.843383	-0.911378	-0.798532
BBA_02339	0.794979	0.406499	0.13266	-0.578902	-0.241432	-1.05534
BBA_04934	0.800565	-0.0831046	-0.456006	-1.05638	-0.61686	-1.23289
BBA_05183	0.803045	1.26207	1.159	-0.678203	-0.0570932	-0.677033
BBA_00771	0.807264	0.25034	0.509966	-0.392739	-0.93231	-0.85282
BBA_08686	0.810323	1.54405	0.992848	0.0125854	-0.642246	-0.652591
BBA_00965	0.81232	0.511151	0.682651	-0.936196	-0.827555	-1.17676
BBA_03398	0.818928	0.558166	0.497751	-0.293132	-0.522964	-0.970315
BBA_00727	0.823446	0.879175	1.62235	-1.56069	-0.701168	-0.324962
BBA_00859	0.823872	2.00712	1.49104	-0.112967	-0.564605	-0.847656
BBA_05625	0.826273	0.522696	0.716151	0.13546	-0.438726	-0.733608
BBA_07147	0.830722	-0.221882	-0.117804	-0.528477	-0.841932	-1.48293
BBA_03082	0.844017	0.268068	2.36215	-0.926167	-0.411971	-0.517235
BBA_09299	0.851372	1.16611	1.32228	0.547539	0.182296	-0.337468
BBA_05167	0.864855	0.161308	0.470085	-0.74088	-0.323801	-0.721954
BBA_06346	0.865136	1.04408	1.2987	-1.09307	-1.33952	-1.51812
BBA_09834	0.867116	-0.124896	0.9062	-1.47424	-1.10475	-1.27973
BBA_10072	0.870684	-0.312126	0.000740329	-1.02455	-0.902714	-1.06658
BBA_02429	0.870872	1.0059	1.36066	-0.87767	-0.114972	-0.250902
BBA_01739	0.870901	0.829778	1.06617	-0.674287	-0.334871	-0.482018
BBA_09474	0.871144	1.77193	1.80376	-0.327183	-0.133993	-0.546575
BBA_08178	0.871751	0.943885	1.29339	-0.325154	-0.656445	-1.03074
BBA_09790	0.873002	0.743525	0.960999	-0.746432	-0.667517	-0.900165
BBA_05010	0.894055	0.138608	0.427215	-0.241607	-0.938017	-1.69508
BBA_05371	0.89408	1.03085	1.37682	-0.572118	-0.453838	-0.703093
BBA_09297	0.894556	1.03836	1.11665	-1.45855	-0.579878	-0.79272
BBA_05508	0.897649	0.541985	0.871668	-1.38195	-1.46304	-1.73797
BBA_03649	0.91154	0.983991	0.986508	0.555946	-0.943037	-1.78873
BBA_02516	0.923921	-0.0768413	0.809009	-0.744848	-0.740753	-0.760141
BBA_10253	0.927084	0.267593	0.585194	-0.760851	-0.522089	-0.946857
BBA_02891	0.943058	0.873313	0.92828	-1.0565	-0.386657	-0.52016
BBA_03501	0.948979	1.11905	1.92896	0.270098	-0.296082	-0.73919
BBA_06170	0.949082	0.370382	0.550179	-0.222211	-0.847116	-0.788224
BBA_03949	0.954717	1.14264	1.87751	-0.865805	-0.324971	-0.805788
BBA_00362	0.962782	0.809372	1.01081	-2.31807	-0.0888557	-0.700011
BBA_04512	0.966139	1.46257	1.80581	-0.849556	-1.07057	-0.599733
BBA_08503	0.966529	0.406422	0.658017	-0.283523	-0.447126	-0.797977
BBA_04647	0.967393	0.719402	1.55018	-0.39697	-1.22812	-1.17487
BBA_09296	0.971529	0.826883	0.904192	-1.17001	-0.33553	-0.655138
BBA_09286	0.973459	0.478122	0.925671	0.0611746	-0.440123	-0.944371
BBA_00565	0.973459	0.675337	0.801116	-0.0912077	-0.732013	-0.846737
BBA_03291	0.976406	2.2405	1.86311	-0.165088	-0.992609	-1.34401
BBA_02276	0.983528	0.0895808	0.496527	-0.651721	-0.657226	-1.16199
BBA_04473	0.988646	-0.045279	1.31831	-0.523755	-0.523765	-0.314413
BBA_04288	0.988978	0.595685	0.685266	-0.0037277	-0.376355	-1.20971
BBA_06352	1.00529	1.08918	1.61382	-0.604119	-0.316528	-0.174967
BBA_02281	1.00861	-0.159574	-0.154034	-1.04963	-1.01317	-0.908267
BBA_09491	1.00913	0.244971	1.13698	-0.724266	-1.0839	-1.44899
BBA_08224	1.01074	0.553697	0.759135	-0.108581	-0.498845	-1.01016
BBA_04409	1.01106	2.48277	0.971018	0.611604	-0.523123	-0.820928
BBA_03816	1.01269	2.21614	1.26601	-0.446997	0.519643	-1.24179
BBA_00934	1.02368	1.11308	0.724521	-0.992739	-0.822264	-1.27772
BBA_01863	1.03127	0.381481	0.456623	0.0306541	-0.322711	-0.831344
BBA_05386	1.0349	0.711274	0.748753	0.358379	-0.0121668	-0.384887
BBA_05176	1.03729	1.55554	1.84776	-0.923845	-0.688447	-0.193015
BBA_00449	1.04435	0.112999	0.959069	-1.01508	-0.547359	-0.636904
BBA_05779	1.04651	1.60475	2.11145	-0.883438	-0.628982	-0.718887
BBA_09128	1.05047	0.39752	0.587695	-1.43929	0.232597	-0.18445
BBA_07336	1.05071	-0.324384	0.145648	-0.959722	-0.803335	-0.843512
BBA_06132	1.05235	1.63268	1.98101	0.0320402	-0.0571835	-0.713709
BBA_01713	1.05452	1.00141	0.88185	-0.0330957	-0.266306	-0.552859
BBA_04339	1.05588	2.34885	1.56292	0.19832	-0.58814	-1.02407
BBA_02833	1.05628	1.62473	1.14867	0.199033	0.21085	-0.337185
BBA_03137	1.06206	0.512591	0.506508	-0.594791	-0.376758	-0.829631
BBA_07809	1.07273	0.232195	1.1201	0.0233076	-0.34031	-0.895593
BBA_09441	1.09863	0.805104	2.55392	0.0944284	0.339284	-1.13752
BBA_05858	1.10286	0.434009	0.937269	-0.538337	-0.574231	-0.98891
BBA_06941	1.10482	0.764836	0.845211	-0.288147	0.0813465	-0.22012
BBA_00614	1.11571	0.822454	1.19972	0.00374789	-0.549425	-0.836089
BBA_09468	1.11607	1.19633	0.947139	-0.0750697	0.150113	-0.444795
BBA_02459	1.11625	0.542747	0.892705	-0.382653	-0.00451178	-0.243678
BBA_06439	1.13497	0.540382	0.548299	0.269374	-0.207321	-0.592
BBA_03216	1.14105	0.200468	0.119366	-1.77801	-0.375318	-0.157844
BBA_07593	1.14242	0.713673	0.690227	-0.86038	-0.566716	-0.502934
BBA_09435	1.14332	2.01916	2.16611	-0.32294	0.350274	0.62528
BBA_02141	1.15233	0.483142	0.896898	0.351469	-1.02866	-1.66461
BBA_02408	1.15236	1.26224	1.46426	-1.17891	-0.4365	-1.00379
BBA_10254	1.16192	0.351883	0.496178	-0.562911	-0.708757	-0.496567
BBA_09434	1.16347	2.21435	2.06817	-0.503468	0.640728	0.786716
BBA_08764	1.17017	0.508365	1.69351	-0.467384	0.00599005	0.0407112
BBA_08621	1.17154	1.4108	1.46878	-0.365687	-0.231948	-0.481484
BBA_07402	1.1719	0.992975	0.882058	-0.113082	-1.00134	-1.58221
BBA_09431	1.17213	2.15215	3.34385	-0.922114	-0.101341	-0.282382
BBA_01740	1.17486	0.694153	0.957327	-1.00186	-0.418135	-0.942903
BBA_09929	1.18273	0.461993	0.289407	-0.331988	-0.122629	-0.611678
BBA_02824	1.18281	1.26367	0.779065	-0.183849	-0.719358	-0.187672
BBA_02114	1.1835	0.542214	1.23241	-0.822316	-0.41361	-0.566017
BBA_00672	1.18987	1.1138	1.38055	-0.720541	-0.446733	-0.893857
BBA_09554	1.19031	0.971185	1.06095	-0.330986	-0.747393	-1.57071
BBA_05887	1.19254	0.736536	0.832045	0.21714	-0.123353	-0.601035
BBA_07335	1.20579	-0.206584	0.510672	-1.00421	-0.476835	-1.0553
BBA_08757	1.20668	1.53057	1.0134	-1.07164	-0.075259	-0.369687
BBA_00254	1.21702	0.359588	0.576734	-0.325713	-0.351971	-0.972115
BBA_05777	1.22192	0.587828	1.19086	0.0144629	-0.425628	-0.662307
BBA_07806	1.2234	1.12945	0.85928	0.396074	0.120352	-0.383604
BBA_00017	1.22443	0.792223	0.262496	-0.462248	0.0785318	-0.493079
BBA_05854	1.23091	1.31277	1.94487	-1.47531	-1.24009	-1.13167
BBA_04583	1.23266	0.776378	0.746428	-0.474835	-0.421833	-1.12604
BBA_02432	1.23549	1.12788	0.426651	-0.752034	-0.430144	-1.37505
BBA_06081	1.23711	0.83506	0.985539	0.530324	-0.103375	-0.65547
BBA_08402	1.24257	0.240576	0.658215	-0.212738	-0.700787	-0.980988
BBA_07675	1.24374	1.55682	2.19268	-0.222713	-0.511893	-0.762684
BBA_07815	1.24586	1.281	1.10705	0.519963	0.127485	-0.330634
BBA_07838	1.24853	1.78233	2.51395	-0.891173	-0.94567	-0.424908
BBA_08466	1.25135	0.895229	0.295699	-0.263254	-0.334387	-0.5563
BBA_08249	1.25272	0.860849	0.784774	0.106265	-0.264635	-0.882944
BBA_05177	1.25587	1.61736	1.92446	-1.34334	-0.625085	-0.571673
BBA_03505	1.2593	0.99698	1.38245	-0.0487058	-0.794222	-1.297
BBA_07811	1.26093	1.24588	0.938504	0.647397	0.171591	-0.348149
BBA_08746	1.26302	0.948928	0.923462	0.0658725	-0.117661	-0.444325
BBA_03635	1.26534	0.801956	0.982575	-1.37005	-0.624724	-1.44954
BBA_06267	1.27499	0.448006	-0.0430646	-0.327467	-0.623057	-0.826951
BBA_08744	1.27824	0.967392	0.917482	-0.121304	-0.335045	-0.686575
BBA_00935	1.28335	0.536929	0.712934	0.0509791	-0.33183	-0.777084
BBA_08403	1.29049	0.288027	0.516136	-0.18162	-0.855771	-1.1016
BBA_07386	1.29275	0.53548	-0.633798	-0.754517	-0.427913	-0.754517
BBA_09990	1.29278	1.62094	2.32663	-0.747482	-0.272212	0.218915
BBA_08175	1.2936	0.0821869	1.59215	0.403773	-1.38058	-1.25718
BBA_07031	1.29397	1.84973	1.97502	-1.38314	-0.777843	-0.565568
BBA_05778	1.30268	2.10789	2.05998	0.299842	-1.10079	-0.15005
BBA_07745	1.30299	0.373764	0.628857	0.0510656	-0.475789	-0.47225
BBA_07534	1.30437	1.26333	1.02347	-0.25181	-0.0315796	-0.427423
BBA_04184	1.30766	1.04756	1.33227	0.0289841	-0.806811	-0.794339
BBA_01069	1.31132	1.10541	1.50413	0.128367	-0.329389	-0.786988
BBA_07588	1.31202	0.796607	0.759324	0.346832	-0.42952	-0.542916
BBA_07813	1.31633	1.23791	1.07377	0.483391	0.0801972	-0.518299
BBA_02275	1.31938	0.172165	0.200041	-0.458421	-0.502647	-0.892423
BBA_07807	1.33093	1.49321	1.12956	0.441918	0.182455	-0.387397
BBA_00095	1.33113	1.29788	1.14338	0.705189	-0.29489	-0.757885
BBA_04613	1.33725	0.943492	1.2071	-0.367871	-0.0534646	-0.493921
BBA_02096	1.3387	0.338308	0.739727	-2.00045	-0.973383	-0.510699
BBA_08743	1.3426	0.85614	0.907863	-0.265727	-0.330173	-0.769288
BBA_02558	1.34563	1.58323	2.33159	-0.459788	-0.469315	-0.84034
BBA_04062	1.34598	0.617398	0.569894	0.0012966	-0.423996	-1.03533
BBA_04917	1.35157	2.21217	1.78101	0.146607	-0.278413	-1.43559
BBA_09295	1.35695	1.21087	1.2366	-1.02823	-0.592595	-0.882698
BBA_02823	1.35823	1.03515	1.79937	-1.00566	0.0402829	-1.0098
BBA_08758	1.35861	0.607802	1.19217	-0.693361	-0.042455	-0.985684
BBA_03191	1.36932	2.83392	3.01189	-0.382447	-0.541291	-0.627037
BBA_09363	1.37123	0.922107	1.21109	-0.983045	-0.217274	-1.74209
BBA_04323	1.3715	1.92028	2.26045	-0.441636	-0.403959	-0.765859
BBA_07787	1.37192	2.44617	2.02442	-1.06457	0.0288931	-1.08727
BBA_09647	1.37468	0.78863	1.4196	-0.552252	-0.665985	-0.647383
BBA_05626	1.37914	0.768928	0.874749	0.717192	-0.593946	-0.994934
BBA_09881	1.37918	2.074	1.91388	0.0721534	0.350582	0.297371
BBA_05376	1.39271	0.823546	1.09574	-0.120174	-0.145056	-0.452916
BBA_04759	1.40103	1.17091	1.44473	-0.033067	-0.592327	-0.96073
BBA_10058	1.40623	1.28783	1.93927	-2.23219	0.251199	-0.163817
BBA_06082	1.41116	1.99097	2.0207	0.57719	0.287182	-0.0952181
BBA_08039	1.41301	-0.496452	0.549697	-0.583713	-1.43735	-1.34625
BBA_05264	1.41543	0.250989	-0.0340361	-0.507798	-0.742058	-1.34053
BBA_08392	1.42	1.43843	1.95323	-0.0885585	-0.168666	-0.534459
BBA_05265	1.42127	1.01274	0.804671	-0.0678265	-0.201394	-0.839488
BBA_04048	1.42309	1.31445	2.1427	-0.653439	-1.05006	-0.523022
BBA_07810	1.42599	1.57589	1.08263	0.204168	-0.121556	-0.634953
BBA_07850	1.4282	1.80608	1.41537	-0.318663	0.0442794	-0.265871
BBA_07814	1.43385	1.42301	1.04919	0.525788	0.11636	-0.399941
BBA_01281	1.43796	1.6992	1.3378	0.637273	0.663988	-0.249871
BBA_01536	1.43997	1.00453	1.50033	-0.660927	-0.365808	-0.735974
BBA_03138	1.44427	0.277631	0.61228	-0.767414	-0.620508	-0.812005
BBA_09487	1.46191	1.81373	1.76028	-0.178582	0.383393	-0.155181
BBA_08801	1.46279	2.20514	2.38039	-0.701002	-0.236424	-0.0421367
BBA_03618	1.46399	0.504081	0.0866248	-0.230479	-0.80272	-0.903073
BBA_05175	1.46751	1.52449	1.65489	-1.59406	-0.712963	-0.358409
BBA_07851	1.4692	0.701526	0.225317	-0.755373	-0.615816	-0.927818
BBA_00687	1.47525	0.470934	0.648504	0.148283	-0.505046	-0.851281
BBA_08246	1.48196	1.9184	2.40998	-0.979397	-0.689593	-0.400163
BBA_06481	1.48476	0.62964	0.770576	-0.210052	-0.303169	-0.694219
BBA_04627	1.49057	0.742681	0.818799	-0.568161	-0.790754	-0.722853
BBA_07364	1.49204	0.705091	1.18884	-0.745974	-0.118239	-0.18247
BBA_07839	1.49501	1.01262	1.20501	-0.990258	-0.289266	-0.5857
BBA_08602	1.50413	0.444277	0.805541	-0.849945	-0.875693	-0.909358
BBA_03644	1.5118	1.22773	1.36254	0.237111	-0.324428	-0.626722
BBA_08745	1.52426	0.888809	0.799545	0.235451	-0.328744	-0.759836
BBA_07337	1.54651	0.126081	0.848922	-1.03353	-0.433392	-0.714409
BBA_06826	1.55056	2.12299	2.52857	-0.609001	-0.609001	0.0413846
BBA_05387	1.55482	0.574629	0.830659	0.126487	-0.229898	-0.831663
BBA_08792	1.55494	1.43955	1.6241	-1.20954	-0.95178	-0.655124
BBA_06989	1.572	0.456897	0.540766	-0.936394	-0.805697	-1.05892
BBA_06679	1.57394	1.38674	1.1846	0.535353	-0.0321252	-1.05196
BBA_05182	1.57552	1.58427	1.41914	-0.834363	-0.484926	-0.962721
BBA_01324	1.57675	0.607837	0.369693	-0.423584	-0.664671	-0.717293
BBA_06453	1.58015	0.577045	0.286499	-0.410931	-0.475195	-0.547748
BBA_07340	1.58081	0.229494	2.21088	-1.06807	-0.384111	-0.708883
BBA_07101	1.5834	1.44533	1.4007	-0.18323	-0.238922	-0.787495
BBA_07148	1.58343	0.456792	0.320714	-0.783338	-0.537444	-0.864849
BBA_03419	1.59693	0.723971	0.779115	-0.0899235	-0.342501	-1.28487
BBA_06360	1.60025	1.07722	1.58948	0.0264511	-0.571171	-0.798345
BBA_05173	1.60157	1.48056	1.89285	-1.30622	-0.775308	-0.338662
BBA_02382	1.6031	0.57169	0.950627	-0.151218	-0.530881	-0.988977
BBA_00533	1.60423	0.509902	0.67191	-0.104512	-0.497064	-1.06067
BBA_04838	1.6046	1.25018	0.457161	-0.224415	-0.135615	-1.03768
BBA_09744	1.60894	0.886829	0.912005	-0.614637	-0.710207	-1.31388
BBA_08435	1.61725	1.65589	1.2282	0.00795552	0.530538	-0.813182
BBA_05683	1.62341	2.46563	2.9051	-0.348285	-0.43054	-0.228279
BBA_08260	1.62373	0.878087	1.68428	-1.16065	-0.92533	-0.866189
BBA_06776	1.62508	1.4107	1.43339	-0.23368	-0.105333	-0.689766
BBA_05891	1.62611	1.24436	1.48575	0.584525	-0.856184	-1.35313
BBA_07577	1.63237	1.83244	2.39901	-0.642266	-0.924344	-0.714059
BBA_05174	1.6328	1.59307	1.7105	-2.03002	-0.717502	-0.221812
BBA_08662	1.63362	0.800463	0.581341	0.16695	-0.780242	-1.27674
BBA_02942	1.6409	0.606851	0.610984	-1.47394	-0.336682	-0.61051
BBA_02945	1.64455	0.762453	0.767879	-0.849857	-0.138874	-0.434391
BBA_08376	1.64794	0.986377	1.26558	-0.786731	0.133496	-0.906485
BBA_00908	1.65205	1.23827	1.81869	-0.692617	-0.782262	-0.729391
BBA_08787	1.65391	0.754526	0.763054	-0.605844	-1.00036	-0.354534
BBA_07175	1.65598	1.068	0.821506	0.0295189	0.230695	-0.160765
BBA_00551	1.65629	1.41231	2.03277	-0.180008	-0.626981	-0.437838
BBA_08127	1.66515	1.13014	1.06069	0.376221	-0.12172	-1.1445
BBA_01322	1.66711	0.617773	1.21668	-0.442862	-0.670946	-0.991047
BBA_06336	1.66755	0.610937	0.472986	-0.691339	-0.964915	-1.04571
BBA_06695	1.68601	1.91878	3.77509	-0.55554	-0.55554	-0.55554
BBA_01903	1.69292	0.726578	1.09684	-0.177556	-0.62284	-1.16021
BBA_09131	1.69601	0.884963	0.496822	0.408909	0.0259337	-0.946846
BBA_07030	1.69865	2.19135	2.4534	-0.795695	-0.367287	-0.49082
BBA_02684	1.70016	1.36758	1.60552	0.506369	-0.203927	-0.386225
BBA_08777	1.70025	1.767	1.34426	-0.292472	-0.300175	-0.62786
BBA_01149	1.70669	0.742371	0.960149	-0.429036	-0.289059	-0.348889
BBA_05225	1.70942	0.857116	1.50896	-0.00762896	0.00186535	-0.339814
BBA_06353	1.71254	2.34772	2.76239	0.936203	0.433924	0.614318
BBA_02701	1.7244	1.50085	0.853663	-0.688934	-0.830253	-0.342358
BBA_09645	1.73339	0.897271	1.03408	-0.508291	-0.818693	-0.862956
BBA_09958	1.74242	2.7916	2.99886	-0.124051	-0.249347	-0.280293
BBA_08650	1.74306	1.5731	1.46099	-0.327435	-0.323261	-0.915387
BBA_00318	1.74647	0.678566	0.804997	-1.71568	-1.02617	-1.24866
BBA_06299	1.76039	2.52762	3.03727	-0.641837	-0.506444	-0.0131747
BBA_04394	1.77869	1.29685	2.00911	0.00571521	-0.193626	-0.348723
BBA_08974	1.78305	0.5574	0.994321	-1.43254	-0.291087	-0.845202
BBA_00952	1.78497	1.55136	1.88422	0.48885	-0.158291	-0.888473
BBA_04690	1.78621	2.25352	1.8777	-0.226135	0.228287	-0.398875
BBA_07612	1.79147	2.1402	2.32317	-1.39516	-0.0986679	-0.240861
BBA_07319	1.82142	1.14253	1.90779	-0.345145	-0.75883	-0.517232
BBA_04139	1.82159	1.87125	2.03762	-0.379026	-1.07255	-1.74871
BBA_07074	1.82234	1.75923	1.91902	-0.595064	-0.511336	-0.679069
BBA_03331	1.82825	1.03124	0.958248	0.222898	-0.324519	-0.757543
BBA_05180	1.83135	1.86909	1.99901	-1.37885	-0.606506	-0.521054
BBA_09436	1.83392	2.62629	3.21452	-0.326475	-0.202199	-0.056751
BBA_01406	1.83582	1.21619	1.33763	-0.842693	-0.61209	-1.22539
BBA_07614	1.83905	2.13586	2.35418	-1.35543	-0.75787	-1.06871
BBA_07250	1.85871	0.792349	1.00036	-0.321556	-0.596142	-0.816329
BBA_06726	1.86425	1.18943	1.86227	-0.880973	-0.659832	-0.934374
BBA_00238	1.86772	0.954518	1.77861	-0.91225	-0.250653	-0.516949
BBA_00448	1.86782	0.677274	0.846794	-0.672959	-1.51864	-0.727796
BBA_09882	1.86804	2.66294	2.40853	-0.376953	0.00622695	0.116665
BBA_04935	1.86852	0.435276	0.780016	-0.835774	-0.709639	-0.68456
BBA_03435	1.87657	0.812107	1.27533	-0.245025	-0.863649	-0.536985
BBA_01783	1.87659	-0.0279808	0.838946	-0.567412	-0.761142	-0.458967
BBA_08818	1.88733	0.104763	1.11997	-0.754578	-0.983597	-0.750344
BBA_05179	1.88846	1.80222	2.01502	-0.900326	-0.596172	-0.393036
BBA_02224	1.89604	1.8439	2.15903	-1.08481	-1.11129	-0.896952
BBA_02700	1.89794	1.34281	0.753306	-0.744025	-0.786734	-0.929282
BBA_08661	1.90084	0.724835	0.417067	-0.815731	-0.720688	-1.12228
BBA_04263	1.90091	1.60872	0.869565	-1.1368	0.299586	-0.177544
BBA_06745	1.92383	2.24306	2.02669	0.332193	-0.207516	-0.801103
BBA_04320	1.92617	1.24389	0.705188	0.362539	0.0326898	-0.817223
BBA_06725	1.92708	1.16143	1.60936	-0.498758	-0.342918	-0.237152
BBA_07842	1.93167	0.67024	0.581151	-0.510465	-0.483951	-1.22855
BBA_00603	1.93418	2.11854	2.2549	-0.392375	-0.465818	-0.850963
BBA_03436	1.93863	0.756995	1.02024	-0.991813	-0.68847	-0.807264
BBA_02414	1.94253	1.81297	2.36943	-0.282558	-0.271742	-0.578067
BBA_02231	1.94306	0.245809	0.222329	-1.09776	-0.930552	-1.07566
BBA_09935	1.96598	1.01328	1.20014	-0.522417	-0.698247	-0.195753
BBA_02407	1.96738	1.76704	2.35495	-0.695426	-0.963662	-0.697758
BBA_10284	1.97187	2.63077	2.4491	0.419473	-0.0310315	-0.443275
BBA_00691	1.97749	0.743985	1.26366	-0.77436	-0.933584	-1.28514
BBA_05815	1.97849	0.868669	0.922678	0.547258	-0.617963	-0.955043
BBA_10003	1.98288	2.72363	2.814	-0.219992	-0.590608	-0.6567
BBA_05181	1.99947	1.91472	1.85504	-1.1615	-0.676795	-0.709979
BBA_09438	2.02297	2.03385	2.75554	-0.822114	-0.822114	-0.713058
BBA_03772	2.02591	1.19693	1.25161	0.245224	0.126989	-0.683999
BBA_08666	2.04259	1.39403	0.709187	0.324632	-0.653685	-1.50466
BBA_05436	2.04615	1.35732	1.05473	-1.15139	-0.30882	-0.453506
BBA_08851	2.04779	2.50352	2.92289	-0.531329	-0.257844	-0.483186
BBA_09904	2.04836	1.05162	1.89998	-0.97815	-0.714097	-0.576419
BBA_09508	2.04949	2.28211	2.93832	-0.433606	-1.01967	-0.708752
BBA_09857	2.05492	2.3426	3.05703	-0.702304	-0.395854	-0.702304
BBA_03917	2.09106	2.64531	2.80443	-0.647092	-0.284108	-0.647092
BBA_02428	2.09451	1.64803	1.99919	-1.00453	-0.791678	-0.289133
BBA_01949	2.0952	1.61445	1.20653	-0.214488	0.0977077	-1.00516
BBA_06727	2.10651	0.705304	1.63952	-0.613346	-0.456833	-0.521309
BBA_08989	2.10858	1.28777	1.3411	-0.776896	-1.04172	-0.966142
BBA_06445	2.11219	0.763687	1.29447	-1.40428	-0.960272	-0.988392
BBA_04576	2.11571	1.08289	1.60617	1.04967	-0.145022	-0.489439
BBA_07613	2.11853	2.22171	2.59269	-1.11041	-0.760487	-0.915206
BBA_00728	2.14239	2.07434	2.94668	-0.940687	-0.519497	-0.79903
BBA_09603	2.14445	0.295682	0.811812	-1.79713	-0.865047	-0.654536
BBA_08753	2.15316	1.82938	2.42771	-0.262957	-0.889203	-0.651598
BBA_02857	2.16221	1.13116	1.17789	0.0167755	-0.845735	-0.737847
BBA_06446	2.16589	0.709878	0.913364	-0.48012	-0.776157	-1.15102
BBA_02427	2.16756	1.62535	2.1969	-0.814948	-1.14605	-0.804363
BBA_09602	2.17701	1.08523	0.927909	0.111117	-0.275911	-1.24776
BBA_04705	2.19604	0.169942	-0.403483	-0.766485	-0.669777	-0.766485
BBA_09437	2.19613	2.46931	3.12781	-0.500016	-0.549545	-0.446934
BBA_07290	2.20588	2.095	2.15872	-0.916331	-0.628702	-0.917791
BBA_04988	2.22095	1.51699	1.69964	0.199925	-0.272216	-0.946142
BBA_02503	2.23568	1.75086	1.97785	-0.566392	-0.471969	-0.753153
BBA_00923	2.25093	2.06135	1.84122	0.277594	-0.198817	0.263717
BBA_09905	2.2703	0.828826	2.28261	-0.785645	-0.983328	-0.971469
BBA_09936	2.293	1.92191	2.40516	-0.526135	-0.724866	-0.165745
BBA_01257	2.29368	1.19518	1.45528	-0.967422	-0.805406	-0.275645
BBA_10115	2.32924	1.07037	1.67968	-1.59614	-0.858355	-0.860555
BBA_08601	2.33622	1.47378	0.8746	-1.23403	-0.903987	-0.391878
BBA_07848	2.39259	1.38804	0.965405	-0.4164	-0.787557	-0.790212
BBA_10255	2.41358	1.68058	1.91149	-0.855226	-0.778023	-0.73961
BBA_02995	2.43402	1.67946	2.26341	0.0497374	-0.309665	-0.597887
BBA_02764	2.58941	2.057	1.65516	0.225252	-0.55559	-1.16232
BBA_09047	2.60808	1.27187	1.22198	-1.04486	-1.39705	-1.79439
BBA_07326	2.61409	1.19478	1.44937	0.458065	-0.477135	-1.10525
BBA_04753	2.63648	2.17297	2.19529	-0.886567	-0.285448	-0.514804
BBA_07289	2.64647	2.46452	3.01734	-0.329936	-0.643914	-0.842714
BBA_09999	2.67618	1.73972	1.66096	-1.12519	-0.637411	-0.18892
BBA_00544	2.69191	1.30226	1.72654	-1.91834	-0.27479	-0.121892
BBA_04974	2.70625	1.58543	1.75469	-0.0620649	-1.10404	-0.678806
BBA_04648	2.73967	1.97607	3.19749	-0.55295	-0.55295	-0.55295
BBA_10078	2.74037	0.417491	1.42479	-1.39933	-0.627871	-0.644051
BBA_09932	2.79258	2.70552	2.42768	-0.621569	-0.555492	-0.493153
BBA_09687	2.85248	1.75639	1.55567	-1.19937	-0.00312391	-0.0649349
BBA_09891	2.87269	1.99691	1.4829	-0.74408	1.12818	-1.26944
BBA_09933	3.00221	2.47944	2.37742	0.819298	-0.547603	-0.495662
BBA_09777	3.01492	1.33233	1.04068	0.0879867	-0.890591	0.348477
BBA_09609	3.02478	1.63885	1.25869	-0.911817	-0.673877	-1.18551
BBA_10221	3.10997	1.40347	1.56069	-1.01537	0.224053	-0.253507
BBA_05157	3.11024	1.35867	1.9259	-1.00631	-0.552118	-0.417928
BBA_09930	3.15153	2.26384	2.69883	-0.41356	-0.41356	-0.41356
BBA_02873	3.25082	0.897206	1.81575	-0.0924583	-0.523992	-1.01981
BBA_09778	3.31044	1.47025	1.01226	-0.168917	-0.365675	0.164304
BBA_09780	3.32913	2.10357	1.76955	-1.11142	0.0512319	-0.183211
BBA_09332	3.43671	1.51558	1.391	-1.33967	0.149912	-0.463344
BBA_10012	3.4885	1.02361	0.668909	-1.03866	-0.925439	-0.768088
BBA_10100	3.59345	1.07202	1.04923	-0.631678	-1.05192	-0.832282
BBA_09327	3.59853	0.852738	1.68208	-0.80392	-0.310926	-0.318851
BBA_02752	3.76406	2.4545	1.71788	-0.394059	-0.394059	-0.394059
BBA_09683	3.79538	0.938227	0.88051	-0.319265	-0.966375	-1.08097

## Sheet: Table S4
Table S4. Lists of 62 Elp3-regulated genes involved in DNA events, cell cycle and trascription of B. bassiana.
Gene ID	Protein description	P value	Log2(ΔElp3/WT)	Fold Change	Regulation
DNA PROGRESS
DNA restriction or modification
BBA_07393	DEAD/DEAH box helicase	0.000698337	-1.01377	0.495251	Down
BBA_01229	C2H2 transcription factor (TFIIIA), putative	0.000774035	-1.1984	0.435758	Down
BBA_01441	Zinc finger protein SFP1	0.000774035	-1.88715	0.27034	Down
BBA_04305	NF-X1 type zinc finger protein	0.000774035	-2.24901	0.210369	Down
BBA_04348	Wd-repeat protein	0.000774035	-1.03654	0.487494	Down
BBA_06115	RNA recognition domain-containing protein	0.000774035	-1.42032	0.373631	Down
BBA_06556	DEAD/DEAH box helicase	0.000774035	-1.30367	0.405094	Down
DNA repair
BBA_00771	Ankyrin repeat protein	0.0195938	1.1231	2.17815	Up
BBA_03454	DNA repair protein RAD14	0.0195938	-1.01757	0.493949	Down
BBA_05182	ATPase protein	0.0195938	1.46326	2.75732	Up
BBA_06573	Poly polymerase 2 ADP-ribosyltransferase 2	0.0195938	-1.82826	0.281605	Down
BBA_06604	Casein kinase 1 epsilon	0.0195938	-2.04548	0.242241	Down
BBA_06710	UV-endonuclease UvdE	0.0195938	-4.3025	0.0506778	Down
BBA_07393	DEAD/DEAH box helicase	0.0195938	-1.01377	0.495251	Down
BBA_09802	tRNA (Uracil-5-)-methyltransferase	0.0195938	-2.01507	0.247402	Down
CELL CYCLE
mitotic cell cycle and cell cycle control
BBA_00589	Pyruvate dehydrogenase	0.0312531	-2.52051	0.174281	Down
BBA_01441	Zinc finger protein SFP1	0.0312531	-1.88715	0.27034	Down
BBA_02186	Protein kinase domain-containing protein	0.0312531	-2.26403	0.20819	Down
BBA_02667	Cyclin-like protein	0.0312531	-1.94959	0.258889	Down
BBA_02804	TRAUB domain-containing protein	0.0312531	-1.22153	0.428828	Down
BBA_03454	DNA repair protein RAD14	0.0312531	-1.01757	0.493949	Down
BBA_03469	Uncharacterized protein	0.0312531	-1.72485	0.302531	Down
BBA_03659	Uncharacterized protein	0.0312531	-3.57849	0.0837081	Down
BBA_03977	MAK16 protein, putative	0.0312531	-1.36209	0.389018	Down
BBA_04348	Wd-repeat protein	0.0312531	-1.03654	0.487494	Down
BBA_04441	Nuclear GTP-binding protein NUG1	0.0312531	-1.40081	0.378718	Down
BBA_04721	Serine protein kinase	0.0312531	-2.1392	0.227006	Down
BBA_05120	Vault protein inter-alpha-trypsin	0.0312531	-1.41526	0.374942	Down
BBA_05182	ATPase protein	0.0312531	1.46326	2.75732	Up
BBA_05224	Protein phosphatase 2C	0.0312531	-3.35927	0.0974447	Down
BBA_05625	Metal ion transporter metal ion transporter	0.0312531	1.60175	3.03511	Up
BBA_05854	Putative phospholipase	0.0312531	2.50939	5.69378	Up
BBA_07524	SDA1 protein, required for normal organization of the actin cytoskeleton	0.0312531	-1.12031	0.459996	Down
BBA_08584	Diphthamide biosynthesis protein	0.0312531	-1.22043	0.429155	Down
BBA_08630	Kinesin family protein	0.0312531	-1.15474	0.449146	Down
BBA_09932	SCF E3 ubiquitin ligase complex F-box protein grrA	0.0312531	6.64751	100.253	Up
BBA_10036	26S proteasome regulatory subunit-like protein	0.0312531	-1.61079	0.32742	Down
BBA_03454	DNA repair protein RAD14	0.0432975	-1.01757	0.493949	Down
cytokinesis (cell division) /septum formation and hydrolysis
BBA_05353	Class III chitinase ChiA2	0.00139153	2.98063	7.89333	Up
BBA_07745	Glycoside hydrolase, catalytic core	0.00139153	1.59708	3.02531	Up
TRANSCRIPTION
RNA synthesis
BBA_00752	Linker histone H1 and H5 family protein	2.31935e-06	-1.20425	0.433995	Down
BBA_01214	HMG box protein	2.31935e-06	-1.63188	0.322668	Down
BBA_01229	C2H2 transcription factor (TFIIIA), putative	2.31935e-06	-1.1984	0.435758	Down
BBA_01441	Zinc finger protein SFP1	2.31935e-06	-1.88715	0.27034	Down
BBA_02196	Nuc-1 negative regulatory protein preg	2.31935e-06	-1.04496	0.484658	Down
BBA_02804	TRAUB domain-containing protein	2.31935e-06	-1.22153	0.428828	Down
BBA_02815	ABC transporter	2.31935e-06	1.19928	2.29625	Up
BBA_03093	U3 small nucleolar RNA associated protein	2.31935e-06	-1.33426	0.396595	Down
BBA_04003	DEAD/DEAH box helicase	2.31935e-06	-1.01415	0.495119	Down
BBA_04256	Fungal specific transcription factor	2.31935e-06	-1.72888	0.301685	Down
BBA_04305	NF-X1 type zinc finger protein	2.31935e-06	-2.24901	0.210369	Down
BBA_04348	Wd-repeat protein	2.31935e-06	-1.03654	0.487494	Down
BBA_04635	CAMK kinase	2.31935e-06	-2.78562	0.145025	Down
BBA_05163	GATA transcription factor AreB	2.31935e-06	-2.57244	0.168119	Down
BBA_05854	Putative phospholipase	2.31935e-06	2.50939	5.69378	Up
BBA_06115	RNA recognition domain-containing protein	2.31935e-06	-1.42032	0.373631	Down
BBA_06250	Transcription factor TamA	2.31935e-06	-1.23736	0.424149	Down
BBA_06556	DEAD/DEAH box helicase	2.31935e-06	-1.30367	0.405094	Down
BBA_06830	Endonuclease/Exonuclease/phosphatase protein	2.31935e-06	-1.72754	0.301966	Down
BBA_07393	DEAD/DEAH box helicase	2.31935e-06	-1.01377	0.495251	Down
BBA_08176	Mitochondrial CorA family metal ion transporter	2.31935e-06	1.1344	2.19527	Up
BBA_08184	Glutathione-s-transferase	2.31935e-06	3.22496	9.34999	Up
BBA_08411	RNA polymerase M/15 kDa subunit	2.31935e-06	-2.65977	0.158245	Down
BBA_10036	26S proteasome regulatory subunit-like protein	2.31935e-06	-1.61079	0.32742	Down
rRNA processing
BBA_00122	rRNA-processing protein UTP23	0.0225692	-1.59326	0.331421	Down
BBA_01170	Ribosome biogenesis regulatory protein	0.0225692	-1.89242	0.269355	Down
BBA_01976	Down-regulated in metastasis	0.0225692	-1.30287	0.405319	Down
BBA_03093	U3 small nucleolar RNA associated protein	0.0225692	-1.33426	0.396595	Down
BBA_03241	p60 domain-containing protein	0.0225692	-1.16811	0.445005	Down
BBA_03921	20S-pre-rRNA D-site endonuclease NOB1	0.0225692	-1.09131	0.469334	Down
BBA_04003	DEAD/DEAH box helicase	0.0225692	-1.01415	0.495119	Down
BBA_04144	Nuclear protein involved in pre-rRNA processing, putative	0.0225692	-1.07952	0.473185	Down
BBA_04348	Wd-repeat protein	0.0225692	-1.03654	0.487494	Down
BBA_04441	Nuclear GTP-binding protein NUG1	0.0225692	-1.40081	0.378718	Down
BBA_05995	Ribosomal protein L10	0.0225692	-1.39116	0.381258	Down
BBA_06556	DEAD/DEAH box helicase	0.0225692	-1.30367	0.405094	Down
BBA_07162	rRNA processing protein	0.0225692	-1.2364	0.42443	Down
BBA_07218	Ebp2p-like protein	0.0225692	-1.12994	0.456934	Down
BBA_07393	DEAD/DEAH box helicase	0.0225692	-1.01377	0.495251	Down
BBA_07911	18S rRNA biogenesis protein RCL1	0.0225692	-1.25866	0.417933	Down
BBA_08114	Eukaryotic translation initiation factor 6 (eIF-6)	0.0225692	-2.51358	0.17512	Down
BBA_08359	Shwachman-Bodian-Diamond syndrome protein	0.0225692	-1.79915	0.287344	Down
BBA_08936	Pre-rRNA-processing protein ESF1	0.0225692	-1.09169	0.469211	Down
BBA_09735	U3 small nucleolar RNA-associated protein	0.0225692	-1.39203	0.38103	Down

## Sheet: Table S5
Table S5. Lists of 58 Elp3-regulated genes involved in cellular transportation of B. bassiana.
Gene ID	Protein description	P value	Log2(ΔElp3/WT)	Fold Change	Regulation
CELLULAR TRANSPORTATION
electron transport
BBA_00965	Cytochrome P450 CYP52T1	0.0145286	1.47487	2.77959	Up
BBA_01452	NMD3 family protein	0.0145286	-1.39911	0.379164	Down
BBA_01656	Amine oxidase	0.0145286	1.24991	2.37826	Up
BBA_01713	Pyridine nucleotide-disulfide oxidoreductase, putative	0.0145286	1.16949	2.24932	Up
BBA_01748	NADPH dehydrogenase	0.0145286	1.20407	2.30389	Up
BBA_02275	Cytochrome P450 CYP5202A1	0.0145286	1.40151	2.64179	Up
BBA_02325	Sugar 1,4-lactone oxidase	0.0145286	-1.29085	0.40871	Down
BBA_02414	Short chain dehydrogenase	0.0145286	2.73756	6.66943	Up
BBA_02823	Cytochrome P450 CYP504E1	0.0145286	1.43081	2.69598	Up
BBA_02824	Short chain dehydrogenase	0.0145286	1.45759	2.7465	Up
BBA_03477	Cytochrome P450 CYP682H1	0.0145286	-1.97266	0.254783	Down
BBA_03664	Amine oxidase	0.0145286	1.21003	2.31343	Up
BBA_03821	N,N-dimethylglycine oxidase	0.0145286	-1.27481	0.413279	Down
BBA_04175	Kynurenine 3-monooxygenase	0.0145286	-1.20518	0.433715	Down
BBA_04583	Putative aldehyde dehydrogenase	0.0145286	1.29218	2.44897	Up
BBA_04648	Cytochrome P450 CYP5280A1P	0.0145286	Inf	Inf	Up
BBA_04690	Na,H/K antiporter P-type ATPase	0.0145286	1.36225	2.57086	Up
BBA_04705	Cytochrome P450 CYP5293A1	0.0145286	6.06257	66.8366	Up
BBA_04759	Zinc-binding dehydrogenase	0.0145286	1.12444	2.18017	Up
BBA_05371	2-nitropropane dioxygenase	0.0145286	1.05502	2.07775	Up
BBA_05387	FAD binding domain-containing protein	0.0145286	1.07001	2.09945	Up
BBA_06826	Glucose oxidase	0.0145286	3.79268	13.8583	Up
BBA_07335	Cytochrome P450 CYP655C1	0.0145286	2.74723	6.71427	Up
BBA_07613	Cytochrome P450 CYP684A2	0.0145286	6.36563	82.4606	Up
BBA_07811	Cytochrome P450 CYP5099A1	0.0145286	1.28757	2.44116	Up
BBA_08402	Monooxygenase-like protein	0.0145286	1.38981	2.62045	Up
BBA_08661	FMN-dependent dehydrogenase	0.0145286	1.96259	3.89761	Up
BBA_08743	Sarcosine oxidase	0.0145286	2.9998	7.9989	Up
BBA_09474	Cytochrome P450 CYP53A11	0.0145286	1.42157	2.67877	Up
BBA_09790	Flavin-containing monooxygenase (EC 1.-.-.-)	0.0145286	3.17283	9.01813	Up
vesicular transport (Golgi network, etc.)
BBA_02804	TRAUB domain-containing protein	0.000116737	-1.22153	0.428828	Down
BBA_05182	ATPase protein	0.000116737	1.46326	2.75732	Up
BBA_05884	Magnesium-translocating P-type ATPase family protein	0.000116737	-1.62	0.325335	Down
BBA_09604	Synaptobrevin-like protein	0.000116737	4.13141	17.5258	Up
non-vesicular cellular import
BBA_00049	Transporter-like protein	0.000330978	-1.07644	0.474199	Down
BBA_00893	Amino acid/polyamine transporter I	0.000330978	-1.48857	0.356365	Down
BBA_00923	Monocarboxylate transporter	0.000330978	1.61054	3.05367	Up
BBA_01122	Trk family potassium uptake protein	0.000330978	-1.5861	0.33307	Down
BBA_01678	ZIP Zinc transporter family protein	0.000330978	-1.79356	0.288459	Down
BBA_02429	Alpha glucoside transporter	0.000330978	1.21004	2.31344	Up
BBA_02762	Sugar transporter	0.000330978	1.04504	2.06343	Up
BBA_02932	General substrate transporter	0.000330978	-1.01839	0.493666	Down
BBA_03123	Uracil permease	0.000330978	-1.87096	0.273392	Down
BBA_03291	MFS monocarboxylate transporter	0.000330978	1.06576	2.09327	Up
BBA_03368	Amino acid permease	0.000330978	-1.19251	0.437541	Down
BBA_03457	Phthalate transporter	0.000330978	-2.37816	0.192355	Down
BBA_04029	Amino acid permease	0.000330978	-1.5592	0.33934	Down
BBA_04064	Allantoate permease	0.000330978	-1.05863	0.480088	Down
BBA_04394	Major facilitator superfamily transporter	0.000330978	1.31242	2.48358	Up
BBA_04647	H(+)-myo-inositol cotransporter	0.000330978	2.73135	6.64077	Up
BBA_05433	Pantothenate transporter liz1	0.000330978	-1.05943	0.479822	Down
BBA_05625	Metal ion transporter metal ion transporter	0.000330978	1.60175	3.03511	Up
BBA_05835	Putative peptide transporter	0.000330978	-1.86644	0.27425	Down
BBA_06081	Allantoate permease	0.000330978	1.16485	2.2421	Up
BBA_07053	Sugar porter family MFS transporter	0.000330978	-2.1476	0.225688	Down
BBA_07340	Monocarboxylate permease-like protein	0.000330978	2.26858	4.8185	Up
BBA_08060	MFS monosaccharide transporter, putative	0.000330978	-1.41871	0.374048	Down
BBA_08997	High-affinity methionine permease	0.000330978	-1.03524	0.487934	Down

## Sheet: Table S6
Table S6. Lists of 28 Elp3-regulated genes involved in cell communication and morphogenesis of B. bassiana.
Gene ID	Protein description	P value	Log2(ΔElp3/WT)	Fold Change	Regulation
CELLULAR COMMUNICATION/SIGNAL TRANSDUCTION MECHANISM
cellular signalling
BBA_00589	Pyruvate dehydrogenase	0.000786135	-2.52051	0.174281	Down
BBA_02186	Protein kinase domain-containing protein	0.000786135	-2.26403	0.20819	Down
BBA_02191	Protein histidine kinase	0.000786135	-1.53149	0.34592	Down
BBA_02491	Rho-related gtp-binding protein rhoe	0.000786135	-1.14679	0.451628	Down
BBA_04101	3'5'-cyclic nucleotide phosphodiesterase	0.000786135	-1.12586	0.458227	Down
BBA_04585	Elongation factor-2 kinase EFK-1B isoform	0.000786135	-1.53	0.346278	Down
BBA_04635	CAMK kinase	0.000786135	-2.78562	0.145025	Down
BBA_04721	Serine protein kinase	0.000786135	-2.1392	0.227006	Down
BBA_04838	1-aminocyclopropane-1-carboxylate synthase	0.000786135	1.50386	2.836	Up
BBA_05182	ATPase protein	0.000786135	1.46326	2.75732	Up
BBA_05224	Protein phosphatase 2C	0.000786135	-3.35927	0.0974447	Down
BBA_06082	ATP synthase F0	0.000786135	1.04796	2.06761	Up
BBA_06604	Casein kinase 1 epsilon	0.000786135	-2.04548	0.242241	Down
BBA_06742	HET domain-containing protein	0.000786135	-1.43247	0.370496	Down
BBA_06745	Putative peroxisomal membrane protein	0.000786135	1.79778	3.47684	Up
BBA_07783	CFEM domain-containing protein	0.000786135	-1.64545	0.319647	Down
BBA_08744	Aspartokinase	0.000786135	2.34965	5.09702	Up
enzyme mediated signal transduction
BBA_02186	Protein kinase domain-containing protein	0.00030654	-2.26403	0.20819	Down
BBA_02491	Rho-related gtp-binding protein rhoe	0.00030654	-1.14679	0.451628	Down
BBA_04101	3'5'-cyclic nucleotide phosphodiesterase	0.00030654	-1.12586	0.458227	Down
BBA_04585	Elongation factor-2 kinase EFK-1B isoform	0.00030654	-1.53	0.346278	Down
BBA_04635	CAMK kinase	0.00030654	-2.78562	0.145025	Down
BBA_04721	Serine protein kinase	0.00030654	-2.1392	0.227006	Down
BBA_06604	Casein kinase 1 epsilon	0.00030654	-2.04548	0.242241	Down
CELL FATE
cell death
BBA_00565	Annexin	0.0339342	1.01486	2.0207	Up
BBA_03137	Putative metacaspase	0.0339342	1.0991	2.14221	Up
BBA_03213	Putative aspartic protease	0.0339342	-1.4631	0.362714	Down
BBA_05182	ATPase protein	0.0339342	1.46326	2.75732	Up
CELL TYPE DIFFERENTIATION
budding, cell polarity and filament formation
BBA_02405	RNA recognition domain-containing protein	0.0450313	-1.12964	0.457031	Down
BBA_03036	Methyltransferase domain-containing protein	0.0450313	-1.02159	0.492573	Down
BBA_03082	Beta (1-3) glucanosyltransferase	0.0450313	1.77777	3.42895	Up
BBA_03137	Putative metacaspase	0.0450313	1.0991	2.14221	Up
BBA_06352	Glycoside hydrolase family 76	0.0450313	1.23455	2.35308	Up
BBA_06532	DUF500 domain protein	0.0450313	1.37907	2.60101	Up
BBA_06742	HET domain-containing protein	0.0450313	-1.43247	0.370496	Down
BBA_09932	SCF E3 ubiquitin ligase complex F-box protein grrA	0.0450313	6.64751	100.253	Up
BBA_10036	26S proteasome regulatory subunit-like protein	0.0450313	-1.61079	0.32742	Down
BBA_10072	Basic proline-rich protein	0.0450313	2.30494	4.94148	Up

## Sheet: Table S7
Table S7. Lists of 89 Elp3-regulated genes involved in cell rescue, defense and virulence of B. bassiana.
Gene ID	Protein description	P value	Fold Change	Log2(ΔElp3/WT)	Regulation
CELL RESCUE, DEFENSE AND VIRULENCE
Stress response
BBA_00212	Proline dehydrogenase	0.00702306	0.377404	-1.40582	Down
BBA_00319	Peptidase S8	0.00702306	0.428192	-1.22367	Down
BBA_00771	Ankyrin repeat protein	0.00702306	2.17815	1.1231	Up
BBA_00878	Proline dehydrogenase	0.00702306	0.339995	-1.55641	Down
BBA_01103	ABC transporter	0.00702306	2.00211	1.00152	Up
BBA_02191	Protein histidine kinase	0.00702306	0.34592	-1.53149	Down
BBA_02325	Sugar 1,4-lactone oxidase	0.00702306	0.40871	-1.29085	Down
BBA_02459	Uncharacterized protein	0.00702306	2.12312	1.08618	Up
BBA_03048	SNO glutamine amidotransferase	0.00702306	0.178364	-2.48711	Down
BBA_03454	DNA repair protein RAD14	0.00702306	0.493949	-1.01757	Down
BBA_03921	20S-pre-rRNA D-site endonuclease NOB1	0.00702306	0.469334	-1.09131	Down
BBA_04568	Arrestin domain-containing protein	0.00702306	0.443806	-1.172	Down
BBA_04917	Mannosylphosphorylation protein MNN4	0.00702306	3.14872	1.65477	Up
BBA_05182	ATPase protein	0.00702306	2.75732	1.46326	Up
BBA_05884	Magnesium-translocating P-type ATPase family protein	0.00702306	0.325335	-1.62	Down
BBA_06573	Poly polymerase 2 ADP-ribosyltransferase 2	0.00702306	0.281605	-1.82826	Down
BBA_06725	ABC transporter	0.00702306	4.85843	2.28049	Up
BBA_06745	Putative peroxisomal membrane protein	0.00702306	3.47684	1.79778	Up
BBA_07250	MAPEG family protein	0.00702306	3.61914	1.85564	Up
BBA_07771	Feebly protein	0.00702306	0.388746	-1.3631	Down
BBA_07869	Nudix domain containing protein	0.00702306	2.33955	1.22623	Up
BBA_08402	Monooxygenase-like protein	0.00702306	2.62045	1.38981	Up
BBA_08580	Subtilisin-like serine protease	0.00702306	0.161248	-2.63265	Down
BBA_08628	Hsp70 family chaperone	0.00702306	2.61051	1.38433	Up
BBA_09790	Flavin-containing monooxygenase	0.00702306	9.01813	3.17283	Up
BBA_09932	SCF E3 ubiquitin ligase complex F-box protein grrA	0.00702306	100.253	6.64751	Up
BBA_10072	Basic proline-rich protein	0.00702306	4.94148	2.30494	Up
DNA damage response
BBA_00771	Ankyrin repeat protein	0.0341189	2.17815	1.1231	Up
BBA_03454	DNA repair protein RAD14	0.0341189	0.493949	-1.01757	Down
BBA_06573	Poly polymerase 2 ADP-ribosyltransferase 2	0.0341189	0.281605	-1.82826	Down
Disease, virulence and defense
chemical agent resistance
BBA_01103	ABC transporter	0.0274305	2.00211	1.00152	Up
BBA_02988	ATPase protein	0.0274305	0.0441995	-4.49983	Down
BBA_03053	Abc transporter	0.0274305	0.029349	-5.09054	Down
BBA_04328	Aminotriazole resistance protein	0.0274305	0.27167	-1.88007	Down
BBA_04568	Arrestin domain-containing protein	0.0274305	0.443806	-1.172	Down
BBA_04576	Multicopper oxidase	0.0274305	2.69766	1.43171	Up
BBA_04721	Serine protein kinase	0.0274305	0.227006	-2.1392	Down
BBA_06602	Abc transporter	0.0274305	0.204193	-2.292	Down
defense related proteins
BBA_02933	Carboxylesterase-like protein	0.00219544	3.70169	1.88819	Up
BBA_03078	Cytochrome P450 CYP68N1	0.00219544	3.98124	1.99322	Up
BBA_04583	Putative aldehyde dehydrogenase	0.00219544	2.44897	1.29218	Up
BBA_04827	Peptide synthetase	0.00219544	0.302931	-1.72294	Down
BBA_06709	Carboxylesterase-like protein	0.00219544	0.383395	-1.3831	Down
BBA_06727	Nonribosomal peptide synthase	0.00219544	12.5411	3.64859	Up
BBA_07336	Cytochrome P450 CYP623C1	0.00219544	15.3023	3.93568	Up
BBA_07611	Non-ribosomal peptide synthetase	0.00219544	2.11537	1.08091	Up
BBA_09286	Oxygenase-like protein	0.00219544	3.62315	1.85725	Up
BBA_09508	CAP domain-containing protein	0.00219544	9.841	3.29881	Up
virulence, disease factors
BBA_00522	Urease (EC 3.5.1.5) (Urea amidohydrolase)	0.0039371	0.388275	-1.36485	Down
BBA_02325	Sugar 1,4-lactone oxidase	0.0039371	0.40871	-1.29085	Down
BBA_02701	Asp-hemolysin	0.0039371	25.757	4.68689	Up
BBA_03477	Cytochrome P450 CYP682H1	0.0039371	0.254783	-1.97266	Down
BBA_03808	NADPH-dependent 1-acyl dihydroxyacetone phosphate reductase, putative	0.0039371	0.294293	-1.76467	Down
BBA_05887	Gamma-glutamyltranspeptidase	0.0039371	2.02916	1.02089	Up
BBA_06082	ATP synthase F0	0.0039371	2.06761	1.04796	Up
BBA_06726	Cytochrome P450 CYP625A1	0.0039371	110.496	6.78785	Up
BBA_06727	Nonribosomal peptide synthase	0.0039371	12.5411	3.64859	Up
BBA_07783	CFEM domain-containing protein	0.0039371	0.319647	-1.64545	Down
BBA_07842	Cyanide hydratase	0.0039371	3.3132	1.72822	Up
BBA_08759	Perilipin MPL1-like protein	0.0039371	0.349025	-1.5186	Down
BBA_09289	Pectin lyase fold/virulence factor	0.0039371	0.486497	-1.0395	Down
BBA_09882	Integral membrane protein	0.0039371	2.08097	1.05726	Up
BBA_10010	Cytochrome P450 CYP542B2	0.0039371	2.55708	1.3545	Up
BBA_10105	Nonribosomal peptide synthase	0.0039371	0.489331	-1.03112	Down
Detoxification
BBA_00544	Major Facilitator Superfamily protein	2.42833e-05	2.52408	1.33576	Up
BBA_00551	Major facilitator superfamily transporter	2.42833e-05	2.12434	1.08701	Up
BBA_00728	Zinc-binding dehydrogenase	2.42833e-05	6.57499	2.71699	Up
BBA_00792	Beta-1, 3 exoglucanase	2.42833e-05	2.06088	1.04326	Up
BBA_00908	RTA1 like protein	2.42833e-05	6.21823	2.6365	Up
BBA_01103	ABC transporter	2.42833e-05	2.00211	1.00152	Up
BBA_01397	ABC multidrug transporter, putative	2.42833e-05	3.0597	1.61339	Up
BBA_02191	Protein histidine kinase	2.42833e-05	0.34592	-1.53149	Down
BBA_02275	Cytochrome P450 CYP5202A1	2.42833e-05	2.64179	1.40151	Up
BBA_02823	Cytochrome P450 CYP504E1	2.42833e-05	2.69598	1.43081	Up
BBA_03053	Abc transporter	2.42833e-05	0.029349	-5.09054	Down
BBA_03458	TfdA family Taurine catabolism dioxygenase TauD	2.42833e-05	0.139665	-2.83996	Down
BBA_03471	FAD dependent oxidoreductase domain containing protein	2.42833e-05	0.116112	-3.10641	Down
BBA_03477	Cytochrome P450 CYP682H1	2.42833e-05	0.254783	-1.97266	Down
BBA_03772	NADPH oxidase regulator NoxR	2.42833e-05	2.1357	1.09471	Up
BBA_03862	Major facilitator superfamily transporter	2.42833e-05	0.349605	-1.5162	Down
BBA_04328	Aminotriazole resistance protein	2.42833e-05	0.27167	-1.88007	Down
BBA_04568	Arrestin domain-containing protein	2.42833e-05	0.443806	-1.172	Down
BBA_04583	Putative aldehyde dehydrogenase	2.42833e-05	2.44897	1.29218	Up
BBA_04648	Cytochrome P450 CYP5280A1P	2.42833e-05	Inf	Inf	Up
BBA_04705	Cytochrome P450 CYP5293A1	2.42833e-05	66.8366	6.06257	Up
BBA_05833	Major facilitator superfamily transporter	2.42833e-05	2.3176	1.21263	Up
BBA_05885	FAD binding domain-containing protein	2.42833e-05	0.452631	-1.14359	Down
BBA_06353	Cytochrome P450 CYP660A2	2.42833e-05	2.89639	1.53425	Up
BBA_06602	Abc transporter	2.42833e-05	0.204193	-2.292	Down
BBA_06726	Cytochrome P450 CYP625A1	2.42833e-05	110.496	6.78785	Up
BBA_06745	Putative peroxisomal membrane protein	2.42833e-05	3.47684	1.79778	Up
BBA_06942	MFS multidrug transporter, putative	2.42833e-05	0.428496	-1.22265	Down
BBA_07031	MFS multidrug transporter	2.42833e-05	12.7103	3.66793	Up
BBA_07175	FAD dependent oxidoreductase domain containing protein	2.42833e-05	2.02909	1.02083	Up
BBA_07250	MAPEG family protein	2.42833e-05	3.61914	1.85564	Up
BBA_07336	Cytochrome P450 CYP623C1	2.42833e-05	15.3023	3.93568	Up
BBA_07613	Cytochrome P450 CYP684A2	2.42833e-05	82.4606	6.36563	Up
BBA_07771	Feebly protein	2.42833e-05	0.388746	-1.3631	Down
BBA_07811	Cytochrome P450 CYP5099A1	2.42833e-05	2.44116	1.28757	Up
BBA_07842	Cyanide hydratase	2.42833e-05	3.3132	1.72822	Up
BBA_08180	MFS multidrug resistance transporter, putative	2.42833e-05	0.311808	-1.68127	Down
BBA_08183	Laccase 2	2.42833e-05	2.15764	1.10945	Up
BBA_08184	Glutathione-s-transferase	2.42833e-05	9.34999	3.22496	Up
BBA_08402	Monooxygenase-like protein	2.42833e-05	2.62045	1.38981	Up
BBA_08686	UDP-glucosyltransferase	2.42833e-05	2.79443	1.48256	Up
BBA_09362	RTA-like protein	2.42833e-05	5.78027	2.53114	Up
BBA_09474	Cytochrome P450 CYP53A11	2.42833e-05	2.67877	1.42157	Up
BBA_09790	Flavin-containing monooxygenase (EC 1.-.-.-)	2.42833e-05	9.01813	3.17283	Up
BBA_10010	Cytochrome P450 CYP542B2	2.42833e-05	2.55708	1.3545	Up
Degradation / modification of foreign (exogenous) compounds
BBA_00047	Cel5b-like protein	0.00204606	2.14266	1.0994	Up
BBA_00792	Beta-1, 3 exoglucanase	0.00204606	2.06088	1.04326	Up
BBA_02933	Carboxylesterase-like protein	0.00204606	3.70169	1.88819	Up
BBA_04705	Cytochrome P450 CYP5293A1	0.00204606	66.8366	6.06257	Up
BBA_07335	Cytochrome P450 CYP655C1	0.00204606	6.71427	2.74723	Up
BBA_09289	Pectin lyase fold/virulence factor	0.00204606	0.486497	-1.0395	Down
BBA_09468	WSC domain-containing protein	0.00204606	2.37377	1.24718	Up
BBA_09790	Flavin-containing monooxygenase	0.00204606	9.01813	3.17283	Up

## Sheet: Table S8
Table S8. Lists of 80 BbElp3-regulated genes enriched in pathogen-host interaction (PHI) networks.
Gene ID	Gene loci	Protein description	Fold Change	Log2(ΔElp3/WT)	P value	Q value	Regulation	Pathogenicity
BBA_05163	EJP65752	GATA transcription factor AreB	0.168119	-2.57244	0.00697298	0.0600891	Down	lethal
BBA_02421	EJP68419	ankyrin repeat and zinc finger domain-containing protein	0.41309	-1.27547	7.58089e-05	0.00201001	Down	lethal
BBA_04539	EJP66599	ribosome biogenesis protein Brx1	0.428661	-1.22209	0.00339523	0.0360273	Down	lethal
BBA_08936	EJP62139	pre-rRNA-processing protein ESF1	0.469211	-1.09169	1.42256e-05	0.000515791	Down	lethal
BBA_03921	EJP67347	20S-pre-rRNA D-site endonuclease NOB1	0.469334	-1.09131	0.0228276	0.132037	Down	lethal
BBA_09603	EJP61467	transposase-like protein	3.1819	1.66989	0.0121858	0.0862931	Up	lethal
BBA_08759	EJP62332	perilipin MPL1-like protein	0.349025	-1.5186	5.77811e-08	4.11731e-06	Down	loss_of_pathogenicity
BBA_02995	EJP68099	branched-chain amino acid aminotransferase	2.16796	1.11634	2.73136e-07	1.70893e-05	Up	loss_of_pathogenicity
BBA_02516	EJP68514	Malate synthase, glyoxysomal	2.18521	1.12777	0.000760988	0.0122582	Up	loss_of_pathogenicity
BBA_09441	EJP61598	NsdD protein	4.33196	2.11502	0.0365147	0.178078	Up	loss_of_pathogenicity
BBA_00565	EJP70935	annexin-like protein	2.0207	1.01486	1.08231e-05	0.000419078	Up	loss_of_pathogenicity
BBA_02195	EJP69160	glucoamylase I precursor	2.28417	1.19167	0.00357667	0.0374492	Up	loss_of_pathogenicity
BBA_04101	EJP66808	3&apos;5&apos;-cyclic nucleotide phosphodiesterase	0.458227	-1.12586	1.32427e-05	0.000492333	Down	loss_of_pathogenicity
BBA_02815	EJP67919	ABC transporter	2.29625	1.19928	7.13109e-06	0.000303619	Up	loss_of_pathogenicity
BBA_03435	EJP67655	NAPE-hydrolyzing phospholipase D	2.07059	1.05004	7.03461e-05	0.00189454	Up	reduced_virulence
BBA_01678	EJP69713	ZIP Zinc transporter family protein	0.288459	-1.79356	1.10112e-09	1.16481e-07	Down	reduced_virulence
BBA_08974	EJP62050	antifungal protein	24.3321	4.60479	0.017649	0.111102	Up	reduced_virulence
BBA_01103	EJP70234	ABC transporter	2.00211	1.00152	0.000154178	0.00353919	Up	reduced_virulence
BBA_02056	EJP69021	YT521-B-like splicing factor	0.262425	-1.93002	0.000923025	0.014073	Down	reduced_virulence
BBA_03047	EJP68151	pyridoxine biosynthesis protein	0.266094	-1.90999	0.00573044	0.0520816	Down	reduced_virulence
BBA_05884	EJP65114	magnesium-translocating P-type ATPase family protein	0.325335	-1.62	0.000398372	0.0075698	Down	reduced_virulence
BBA_02191	EJP69156	protein histidine kinase	0.34592	-1.53149	0.016761	0.107608	Down	reduced_virulence
BBA_00522	EJP70892	Urease, alpha subunit	0.388275	-1.36485	2.3042e-07	1.48701e-05	Down	reduced_virulence
BBA_03071	EJP68175	hydrophobin-like protein	0.405884	-1.30086	0.0306685	0.159316	Down	reduced_virulence
BBA_03241	EJP67461	p60 domain-containing protein	0.445005	-1.16811	0.00812929	0.0660449	Down	reduced_virulence
BBA_07786	EJP63186	calcium-translocating P-type ATPase	0.47868	-1.06287	0.0104262	0.0780053	Down	reduced_virulence
BBA_04241	EJP66948	phosphoesterase-like protein	0.492629	-1.02143	0.0291475	0.155045	Down	reduced_virulence
BBA_09119	EJP61963	phosphoesterase-like protein	0.498437	-1.00452	7.89409e-05	0.0020611	Down	reduced_virulence
BBA_00792	EJP69923	beta-1, 3 exoglucanase precursor	2.06088	1.04326	0.00145143	0.019622	Up	reduced_virulence
BBA_08178	EJP62791	hydantoinase B/oxoprolinase	2.17695	1.12231	1.04621e-07	7.13146e-06	Up	reduced_virulence
BBA_02833	EJP67937	phosphoenolpyruvate carboxykinase	2.19495	1.13419	1.16043e-06	6.33362e-05	Up	reduced_virulence
BBA_06941	EJP64237	short-chain type dehydrogenase, putative	2.25997	1.17631	4.57417e-05	0.0013334	Up	reduced_virulence
BBA_07588	EJP63412	beta-eliminating lyase	2.28801	1.19409	0.00101469	0.0150562	Up	reduced_virulence
BBA_05167	EJP65756	peptidase family M48	2.35836	1.23779	0.00033017	0.0065912	Up	reduced_virulence
BBA_04583	EJP66643	putative aldehyde dehydrogenase	2.44897	1.29218	1.07352e-07	7.24694e-06	Up	reduced_virulence
BBA_06439	EJP64445	CipC protein	2.55154	1.35137	0.0126683	0.0885087	Up	reduced_virulence
BBA_10010	EJP61051	Cytochrome P450 CYP542B2	2.55708	1.3545	3.0465e-08	2.36819e-06	Up	reduced_virulence
BBA_08175	EJP62788	evolved D-lactonohydrolase	2.71632	1.44166	0.0220592	0.128731	Up	reduced_virulence
BBA_02382	EJP68380	Cytochrome P450 CYP52T1	2.9169	1.54444	0.00164075	0.0216398	Up	reduced_virulence
BBA_00967	EJP70098	polyketide synthase	2.97182	1.57135	3.53123e-05	0.00107519	Up	reduced_virulence
BBA_02428	EJP68426	Cytochrome P450 CYP52G8	3.5217	1.81627	1.01225e-17	3.46224e-15	Up	reduced_virulence
BBA_09435	EJP61592	C6 zinc finger domain-containing protein	5.1145	2.35459	0.000370405	0.00717118	Up	reduced_virulence
BBA_08801	EJP62259	beta-1,6-glucanase precursor	6.16165	2.62332	1.25598e-08	1.03933e-06	Up	reduced_virulence
BBA_06826	EJP64122	glucose oxidase precursor	13.8583	3.79268	0.0112905	0.0816136	Up	reduced_virulence
BBA_06346	EJP64777	oxaloacetate acetylhydrolase	14.3589	3.84387	4.28745e-25	2.7496e-22	Up	reduced_virulence
BBA_05173	EJP65762	Cytochrome P450 CYP52G6	14.625	3.87037	7.22301e-23	3.70576e-20	Up	reduced_virulence
BBA_09628	EJP61438	C6 zinc finger domain-containing protein	18.7521	4.22898	1.20333e-11	1.84289e-09	Up	reduced_virulence
BBA_08580	EJP62496	subtilisin-like serine protease	0.161248	-2.63265	0.017775	0.11169	Down	unaffected_pathogenicity
BBA_03457	EJP67677	phthalate transporter	0.192355	-2.37816	1.97513e-16	5.79052e-14	Down	unaffected_pathogenicity
BBA_04305	EJP67012	NF-X1 type zinc finger protein	0.210369	-2.24901	6.76291e-12	1.0676e-09	Down	unaffected_pathogenicity
BBA_01214	EJP70345	HMG box protein	0.322668	-1.63188	0.00891606	0.0703211	Down	unaffected_pathogenicity
BBA_10036	EJP61022	26S proteasome regulatory subunit-like protein	0.32742	-1.61079	0.000294278	0.006073	Down	unaffected_pathogenicity
BBA_07168	EJP63844	zinc finger protein RTS2	0.353103	-1.50184	6.99282e-05	0.00189244	Down	unaffected_pathogenicity
BBA_04501	EJP66561	C2H2 finger domain protein	0.353576	-1.49991	0.00495713	0.0469235	Down	unaffected_pathogenicity
BBA_06709	EJP64327	carboxylesterase-like protein	0.383395	-1.3831	2.13133e-08	1.72201e-06	Down	unaffected_pathogenicity
BBA_03822	EJP67248	C6 transcription factor	0.391043	-1.3546	1.43753e-08	1.18004e-06	Down	unaffected_pathogenicity
BBA_06732	EJP64350	MYB DNA-binding domain-containing protein	0.406353	-1.2992	0.00134395	0.0185616	Down	unaffected_pathogenicity
BBA_06250	EJP64681	transcription factor TamA	0.424149	-1.23736	3.92419e-09	3.56338e-07	Down	unaffected_pathogenicity
BBA_00319	EJP70689	Peptidase S8	0.428192	-1.22367	0.000671981	0.0112117	Down	unaffected_pathogenicity
BBA_09806	EJP61229	C2H2 transcription factor	0.430557	-1.21572	0.0205017	0.122583	Down	unaffected_pathogenicity
BBA_00752	EJP69883	linker histone H1 and H5 family protein	0.433995	-1.20425	0.0452073	0.204259	Down	unaffected_pathogenicity
BBA_01229	EJP70360	C2H2 transcription factor (TFIIIA), putative	0.435758	-1.1984	0.000327454	0.00658652	Down	unaffected_pathogenicity
BBA_03570	EJP67790	hypothetical protein BBA_03570	0.439329	-1.18662	0.00639563	0.0564278	Down	unaffected_pathogenicity
BBA_00049	EJP70419	transporter-like protein	0.474199	-1.07644	0.0173603	0.109892	Down	unaffected_pathogenicity
BBA_08183	EJP62796	laccase 2	2.15764	1.10945	0.0126045	0.0882231	Up	unaffected_pathogenicity
BBA_05183	EJP65772	Cel3e-like protein	2.30604	1.20542	2.36227e-08	1.87901e-06	Up	unaffected_pathogenicity
BBA_02141	EJP69106	mannitol-1-phosphate dehydrogenase	2.35766	1.23736	0.00227383	0.0272886	Up	unaffected_pathogenicity
BBA_04576	EJP66636	multicopper oxidase	2.69766	1.43171	0.010408	0.0779758	Up	unaffected_pathogenicity
BBA_02114	EJP69079	mitochondrial phosphate carrier protein	2.88066	1.5264	2.8997e-07	1.78166e-05	Up	unaffected_pathogenicity
BBA_07842	EJP63242	cyanide hydratase	3.3132	1.72822	0.017184	0.109135	Up	unaffected_pathogenicity
BBA_03082	EJP68186	beta (1-3) glucanosyltransferase	3.42895	1.77777	0.0255405	0.142044	Up	unaffected_pathogenicity
BBA_05854	EJP65084	putative phospholipase	5.69378	2.50939	1.39172e-13	2.97508e-11	Up	unaffected_pathogenicity
BBA_08753	EJP62326	ErfK/YbiS/YcfS/YnhG family protein	7.77809	2.95942	7.48006e-21	3.33708e-18	Up	unaffected_pathogenicity
BBA_03862	EJP67288	major facilitator superfamily transporter	0.349605	-1.5162	0.0131897	0.091446	Down	unaffected_pathogenicity
BBA_09211	EJP61874	exo-beta-1,3-glucanase, putative	4.92634	2.30052	6.60274e-05	0.00181637	Up	plant_avirulence_determinant effector
BBA_03138	EJP68242	LysM domain-containing protein	37.8951	5.24394	0.0344526	0.171361	Up	plant_avirulence_determinant effector
BBA_08602	EJP62518	LysM domain-containing protein	112.915	6.81909	0.00438871	0.0430552	Up	plant_avirulence_determinant effector
BBA_03772	EJP67198	NADPH oxidase regulator NoxR	2.1357	1.09471	0.000493767	0.00885759	Up	enhanced_antagonism
BBA_08897	EJP62100	longiborneol synthase	0.0938624	-3.41331	7.32463e-10	8.16935e-08	Down	increased_virulence_(hypervirulence)
BBA_05353	EJP65484	class III chitinase ChiA2	7.89333	2.98063	0.0197451	0.11987	Up	increased_virulence_(hypervirulence)

## Sheet: Table S9
Table S9. Lists of 64 DEGs enriched in 57 KEGG pathways in ΔBbElp3 versus WT.
PathwayID	Pathway	Level1	Level2	Up_number	Down_number	DEG_number	P value	FDR	Up_gene	Down_gene
ko03008	Ribosome biogenesis in eukaryotes	Genetic Information Processing	Translation	0	7	7	0.0147264	0.368497	-	BBA_08359( BBA_08359),BBA_09735( BBA_09735),BBA_07911( BBA_07911),BBA_04441( BBA_04441),BBA_03921( BBA_03921),BBA_01452( BBA_01452),BBA_08114( BBA_08114)
ko00053	Ascorbate and aldarate metabolism	Metabolism	Carbohydrate metabolism	2	0	2	0.0217899	0.368497	BBA_08175( BBA_08175),BBA_04583( BBA_04583)	-
ko00750	Vitamin B6 metabolism	Metabolism	Metabolism of cofactors and vitamins	0	2	2	0.0297071	0.368497	-	BBA_03047( BBA_03047),BBA_03048( BBA_03048)
ko00460	Cyanoamino acid metabolism	Metabolism	Metabolism of other amino acids	3	0	3	0.0336325	0.368497	BBA_05183( BBA_05183),BBA_05887( BBA_05887),BBA_07842( BBA_07842)	-
ko00620	Pyruvate metabolism	Metabolism	Carbohydrate metabolism	4	0	4	0.0342759	0.368497	BBA_08661( BBA_08661),BBA_02833( BBA_02833),BBA_02516( BBA_02516),BBA_04583( BBA_04583)	-
ko00650	Butanoate metabolism	Metabolism	Carbohydrate metabolism	3	0	3	0.0387891	0.368497	BBA_07577( BBA_07577),BBA_02503( BBA_02503),BBA_02684( BBA_02684)	-
ko00430	Taurine and hypotaurine metabolism	Metabolism	Metabolism of other amino acids	2	0	2	0.0483073	0.393359	BBA_07577( BBA_07577),BBA_05887( BBA_05887)	-
ko00500	Starch and sucrose metabolism	Metabolism	Carbohydrate metabolism	4	0	4	0.0648822	0.450098	BBA_00047( BBA_00047),BBA_05183( BBA_05183),BBA_05376( BBA_05376),BBA_02195( BBA_02195)	-
ko00254	Aflatoxin biosynthesis	Metabolism	Biosynthesis of other secondary metabolites	0	1	1	0.0790799	0.450098	-	BBA_03808( BBA_03808)
ko00332	Carbapenem biosynthesis	Metabolism	Biosynthesis of other secondary metabolites	1	0	1	0.0790799	0.450098	BBA_04139( BBA_04139)	-
ko00740	Riboflavin metabolism	Metabolism	Metabolism of cofactors and vitamins	0	2	2	0.0942791	0.450098	-	BBA_04241( BBA_04241),BBA_09119( BBA_09119)
ko00480	Glutathione metabolism	Metabolism	Metabolism of other amino acids	3	0	3	0.10961	0.450098	BBA_05887( BBA_05887),BBA_07250( BBA_07250),BBA_08178( BBA_08178)	-
ko00791	Atrazine degradation	Metabolism	Xenobiotics biodegradation and metabolism	0	1	1	0.116259	0.450098	-	BBA_00522( BBA_00522)
ko00360	Phenylalanine metabolism	Metabolism	Amino acid metabolism	3	0	3	0.118368	0.450098	BBA_02823( BBA_02823),BBA_02503( BBA_02503),BBA_01069( BBA_01069)	-
ko00290	Valine, leucine and isoleucine biosynthesis	Metabolism	Amino acid metabolism	1	1	2	0.120519	0.450098	BBA_02995( BBA_02995)	BBA_01687( BBA_01687)
ko00730	Thiamine metabolism	Metabolism	Metabolism of cofactors and vitamins	0	2	2	0.13424	0.450098	-	BBA_04241( BBA_04241),BBA_09119( BBA_09119)
ko00340	Histidine metabolism	Metabolism	Amino acid metabolism	2	0	2	0.13424	0.450098	BBA_04974( BBA_04974),BBA_04583( BBA_04583)	-
ko00280	Valine, leucine and isoleucine degradation	Metabolism	Amino acid metabolism	3	0	3	0.155776	0.472106	BBA_02684( BBA_02684),BBA_02995( BBA_02995),BBA_04583( BBA_04583)	-
ko00920	Sulfur metabolism	Metabolism	Energy metabolism	2	0	2	0.162623	0.472106	BBA_01713( BBA_01713),BBA_00095( BBA_00095)	-
ko00330	Arginine and proline metabolism	Metabolism	Amino acid metabolism	3	0	3	0.165651	0.472106	BBA_04139( BBA_04139),BBA_01069( BBA_01069),BBA_04583( BBA_04583)	-
ko00010	Glycolysis / Gluconeogenesis	Metabolism	Carbohydrate metabolism	3	0	3	0.175707	0.476919	BBA_02833( BBA_02833),BBA_07326( BBA_07326),BBA_04583( BBA_04583)	-
ko00310	Lysine degradation	Metabolism	Amino acid metabolism	2	0	2	0.206873	0.512685	BBA_09299( BBA_09299),BBA_04583( BBA_04583)	-
ko00410	beta-Alanine metabolism	Metabolism	Metabolism of other amino acids	2	0	2	0.206873	0.512685	BBA_07577( BBA_07577),BBA_04583( BBA_04583)	-
ko00270	Cysteine and methionine metabolism	Metabolism	Amino acid metabolism	3	0	3	0.250007	0.593767	BBA_04627( BBA_04627),BBA_01903( BBA_01903),BBA_02995( BBA_02995)	-
ko00564	Glycerophospholipid metabolism	Metabolism	Lipid metabolism	3	0	3	0.28323	0.645765	BBA_05779( BBA_05779),BBA_05854( BBA_05854),BBA_05626( BBA_05626)	-
ko03020	RNA polymerase	Genetic Information Processing	Transcription	0	2	2	0.297794	0.652857	-	BBA_07022( BBA_07022),BBA_08411( BBA_08411)
ko00511	Other glycan degradation	Metabolism	Glycan biosynthesis and metabolism	0	1	1	0.310028	0.654504	-	BBA_03660( BBA_03660)
ko04122	Sulfur relay system	Genetic Information Processing	Folding, sorting and degradation	1	0	1	0.33794	0.68795	BBA_06745( BBA_06745)	-
ko00565	Ether lipid metabolism	Metabolism	Lipid metabolism	1	0	1	0.415126	0.790299	BBA_05779( BBA_05779)	-
ko00380	Tryptophan metabolism	Metabolism	Amino acid metabolism	2	0	2	0.415947	0.790299	BBA_01069( BBA_01069),BBA_04583( BBA_04583)	-
ko00100	Steroid biosynthesis	Metabolism	Lipid metabolism	1	0	1	0.524411	0.884414	BBA_05225( BBA_05225)	-
ko00770	Pantothenate and CoA biosynthesis	Metabolism	Metabolism of cofactors and vitamins	1	0	1	0.524411	0.884414	BBA_02995( BBA_02995)	-
ko00071	Fatty acid degradation	Metabolism	Lipid metabolism	1	0	1	0.543701	0.884414	BBA_04583( BBA_04583)	-
ko00260	Glycine, serine and threonine metabolism	Metabolism	Amino acid metabolism	2	0	2	0.548316	0.884414	BBA_07588( BBA_07588),BBA_09299( BBA_09299)	-
ko00400	Phenylalanine, tyrosine and tryptophan biosynthesis	Metabolism	Amino acid metabolism	1	0	1	0.562214	0.884414	BBA_09256( BBA_09256)	-
ko00220	Arginine biosynthesis	Metabolism	Amino acid metabolism	0	1	1	0.579981	0.884414	-	BBA_00522( BBA_00522)
ko03410	Base excision repair	Genetic Information Processing	Replication and repair	0	1	1	0.597032	0.884414	-	BBA_06573( BBA_06573)
ko00030	Pentose phosphate pathway	Metabolism	Carbohydrate metabolism	1	0	1	0.613396	0.884414	BBA_08175( BBA_08175)	-
ko00230	Purine metabolism	Metabolism	Nucleotide metabolism	0	2	2	0.617162	0.884414	-	BBA_04101( BBA_04101),BBA_00522( BBA_00522)
ko00520	Amino sugar and nucleotide sugar metabolism	Metabolism	Carbohydrate metabolism	2	0	2	0.627829	0.884414	BBA_07745( BBA_07745),BBA_05353( BBA_05353)	-
ko00020	Citrate cycle (TCA cycle)	Metabolism	Carbohydrate metabolism	1	0	1	0.67251	0.884414	BBA_02833( BBA_02833)	-
ko00561	Glycerolipid metabolism	Metabolism	Lipid metabolism	1	0	1	0.698609	0.884414	BBA_04583( BBA_04583)	-
ko00051	Fructose and mannose metabolism	Metabolism	Carbohydrate metabolism	1	0	1	0.698609	0.884414	BBA_02141( BBA_02141)	-
ko00513	Various types of N-glycan biosynthesis	Metabolism	Glycan biosynthesis and metabolism	1	0	1	0.698609	0.884414	BBA_05858( BBA_05858)	-
ko04139	Mitophagy - yeast	Cellular Processes	Transport and catabolism	0	1	1	0.710872	0.884414	-	BBA_02191( BBA_02191)
ko00250	Alanine, aspartate and glutamate metabolism	Metabolism	Amino acid metabolism	1	0	1	0.722641	0.884414	BBA_07577( BBA_07577)	-
ko00510	N-Glycan biosynthesis	Metabolism	Glycan biosynthesis and metabolism	1	0	1	0.744769	0.884414	BBA_05858( BBA_05858)	-
ko00630	Glyoxylate and dicarboxylate metabolism	Metabolism	Carbohydrate metabolism	1	0	1	0.744769	0.884414	BBA_02516( BBA_02516)	-
ko04141	Protein processing in endoplasmic reticulum	Genetic Information Processing	Folding, sorting and degradation	1	1	2	0.795567	0.9132	BBA_05858( BBA_05858)	BBA_07886( BBA_07886)
ko00970	Aminoacyl-tRNA biosynthesis	Genetic Information Processing	Translation	0	1	1	0.801174	0.9132	-	BBA_04826( BBA_04826)
ko03420	Nucleotide excision repair	Genetic Information Processing	Replication and repair	0	1	1	0.817073	0.9132	-	BBA_03454( BBA_03454)
ko04146	Peroxisome	Cellular Processes	Transport and catabolism	1	0	1	0.868999	0.952557	BBA_09299( BBA_09299)	-
ko04113	Meiosis - yeast	Cellular Processes	Cell growth and death	0	1	1	0.889174	0.956282	-	BBA_05141( BBA_05141)
ko04011	MAPK signaling pathway - yeast	Environmental Information Processing	Signal transduction	0	1	1	0.920729	0.966904	-	BBA_02191( BBA_02191)
ko04138	Autophagy - yeast	Cellular Processes	Transport and catabolism	0	1	1	0.932978	0.966904	-	BBA_02667( BBA_02667)
ko03013	RNA transport	Genetic Information Processing	Translation	0	1	1	0.973472	0.97457	-	BBA_01452( BBA_01452)
ko03040	Spliceosome	Genetic Information Processing	Transcription	0	1	1	0.97457	0.97457	-	BBA_04354( BBA_04354)

## Sheet: Table S10
Table S10. Lists of the top 20 up-regulated genes and the top 20 down-regulated gene in ΔBbElp3 versus WT.
Gene ID	Protein description	Log2(ΔElp3/WT)	Fold Change	P value	Q value	Regulation
BBA_03053	abc transporter	-5.09054	0.029349	0.00550896	0.0507664	Down
BBA_02988	ATPase protein	-4.49983	0.0441995	0.000730967	0.0120007	Down
BBA_05184	Trypsin-related protease	-4.47082	0.0450971	0.00171577	0.0224072	Down
BBA_06710	UV-endonuclease UvdE	-4.3025	0.0506778	0.00107242	0.0157202	Down
BBA_03634	hypothetical protein BBA_03634	-4.24052	0.0529025	9.22056e-05	0.0023361	Down
BBA_00733	SAM-dependent methyltransferase	-3.8693	0.0684263	0.00870135	0.0693738	Down
BBA_00628	salicylate hydroxylase	-3.63364	0.0805686	6.61075e-12	1.05989e-09	Down
BBA_03659	hypothetical protein BBA_03659	-3.57849	0.0837081	0.00872693	0.0693738	Down
BBA_08897	longiborneol synthase	-3.41331	0.0938624	7.32463e-10	8.16935e-08	Down
BBA_05224	protein phosphatase 2C	-3.35927	0.0974447	0.00110858	0.0161579	Down
BBA_03899	CHY zinc finger domain-containing protein	-3.35748	0.0975661	0.000141866	0.00330087	Down
BBA_09690	hypothetical protein BBA_09690	-3.34822	0.0981944	0.0440037	0.200676	Down
BBA_02326	sodium symporter family protein	-3.26731	0.103858	2.03069e-06	0.000102645	Down
BBA_05652	hypothetical protein BBA_05652	-3.24477	0.105494	0.00490412	0.0465936	Down
BBA_04912	hypothetical protein BBA_04912	-3.21954	0.107355	0.0206585	0.123028	Down
BBA_04963	hypothetical protein BBA_04963	-3.20147	0.108708	2.17262e-13	4.54965e-11	Down
BBA_00441	hypothetical protein BBA_00441	-3.15505	0.112262	0.00166327	0.0218806	Down
BBA_03471	FAD dependent oxidoreductase domain containing protein	-3.10641	0.116112	0.0245842	0.138451	Down
BBA_05973	hypothetical protein BBA_05973	-3.08063	0.118206	0.0194601	0.118915	Down
BBA_06603	hypothetical protein BBA_06603	-3.06703	0.119326	0.0108701	0.0800705	Down
BBA_03419	hypothetical protein BBA_03419	5.23367	37.6263	0.0332533	0.167837	Up
BBA_03138	LysM domain-containing protein	5.24394	37.8951	0.0344526	0.171361	Up
BBA_08851	hypothetical protein BBA_08851	5.31313	39.7569	3.15698e-10	3.8564e-08	Up
BBA_09363	hypothetical protein BBA_09363	5.33832	40.4571	6.37324e-10	7.34784e-08	Up
BBA_07289	alpha/beta hydrolase, putative	5.38187	41.6968	1.66417e-25	1.1384e-22	Up
BBA_02700	hypothetical protein BBA_02700	5.39934	42.2048	3.35304e-08	2.54856e-06	Up
BBA_09645	hypothetical protein BBA_09645	5.53183	46.2643	0.00136713	0.0187541	Up
BBA_09857	alpha/beta hydrolase	5.66532	50.7495	2.33697e-09	2.17997e-07	Up
BBA_03917	hypothetical protein BBA_03917	5.84616	57.5265	8.01292e-15	1.95763e-12	Up
BBA_03191	argininosuccinate lyase	5.94942	61.7952	7.24682e-09	6.19663e-07	Up
BBA_04705	Cytochrome P450 CYP5293A1	6.06257	66.8366	0.0380043	0.182055	Up
BBA_07614	hypothetical protein BBA_07614	6.23675	75.4137	2.76884e-35	2.84111e-32	Up
BBA_07613	Cytochrome P450 CYP684A2	6.36563	82.4606	9.13323e-22	4.46267e-19	Up
BBA_07290	hypothetical protein BBA_07290	6.5831	95.8758	3.93594e-121	4.03867e-117	Up
BBA_09932	SCF E3 ubiquitin ligase complex F-box protein grrA	6.64751	100.253	9.56875e-25	5.77558e-22	Up
BBA_06726	Cytochrome P450 CYP625A1	6.78785	110.496	3.19503e-11	4.55336e-09	Up
BBA_08602	LysM domain-containing protein	6.81909	112.915	0.00438871	0.0430552	Up
BBA_07148	hypothetical protein BBA_07148	6.88936	118.551	0.0486735	0.213659	Up
BBA_03436	hypothetical protein BBA_03436	7.36316	164.639	0.0146554	0.098401	Up
BBA_09438	Methyltransferase type 11	7.73263	212.693	6.19074e-20	2.54093e-17	Up
